# Supplementary material for: Macrophages transfer mitochondria to sensory neurons to resolve inflammatory pain
Source: bioRxiv or medRxiv preprint supplement (doi:10.1101/2020.02.12.940445), 2021-09-21
Supplement: Supplementary file [file media-1.pdf]

Fig 1A

| Two-way RM ANOVA                |                      | Matching: Stacked |                 |                   |         |
|---------------------------------|----------------------|-------------------|-----------------|-------------------|---------|
| Assume sphericity?              | Yes                  |                   |                 |                   |         |
| Alpha                           |                      | 0,05              |                 |                   |         |
| Source of Variation             | % of total variation | P value           | P value summary | Significant?      |         |
| Time x Treatment                |                      | 26                | 0,01 *          | Yes               |         |
| Time                            |                      | 17                | 0,072 ns        | No                |         |
| Treatment                       |                      | 22 <0,001         | ****            | Yes               |         |
| Subject                         |                      | 0,27              | 0,992 ns        | No                |         |
| ANOVA table                     | SS                   | DF                | MS              | F (DFn, DFd)      | P value |
| Time x Treatment                | 0,89                 | 8                 | 0,11            | F (8, 32) = 3,1   | P=0,010 |
| Time                            | 0,59                 | 8                 | 0,073           | F (8, 32) = 2,0   | P=0,072 |
| Treatment                       | 0,75                 | 1                 | 0,75            | F (1, 4) = 332    | P<0,001 |
| Subject                         | 0,009                | 4                 | 0,0023          | F (4, 32) = 0,063 | P=0,992 |
| Residual                        | 1,1                  | 32                | 0,036           |                   |         |
| Difference between column means |                      |                   |                 |                   |         |
| Mean of Carrageenan             |                      | 0,34              |                 |                   |         |
| Mean of Saline                  |                      | 0,58              |                 |                   |         |
| Difference between means        |                      | -0,24             |                 |                   |         |
| SE of difference                |                      | 0,013             |                 |                   |         |
| 95% CI of difference            | -0,27 to -0,20       |                   |                 |                   |         |
| Data summary                    |                      |                   |                 |                   |         |
| Number of columns (Treatment)   |                      | 2                 |                 |                   |         |
| Number of rows (Time)           |                      | 9                 |                 |                   |         |
| Number of subjects (Subject)    |                      | 6                 |                 |                   |         |
| Number of missing values        |                      | 0                 |                 |                   |         |

Compare each cell mean with the other cell mean in that row

|                                   |            |                       |              |         |                  |
|-----------------------------------|------------|-----------------------|--------------|---------|------------------|
| Number of families                | 1          |                       |              |         |                  |
| Number of comparisons per family  | 9          |                       |              |         |                  |
| Alpha                             | 0,05       |                       |              |         |                  |
| Sidak's multiple comparisons test | Mean Diff, | 95,00% CI of diff,    | Significant? | Summary | Adjusted P Value |
| Carrageenan - Saline              |            |                       |              |         |                  |
| 0                                 |            | 0,059 -0,37 to 0,49   | No           | ns      | >0,999           |
| 0.5                               |            | -0,56 -0,99 to -0,13  | Yes          | **      | 0,004            |
| 1                                 |            | -0,51 -0,94 to -0,083 | Yes          | *       | 0,011            |
| 2                                 |            | -0,5 -0,93 to -0,069  | Yes          | *       | 0,014            |
| 3                                 |            | -0,46 -0,89 to -0,033 | Yes          | *       | 0,028            |
| 4                                 |            | -0,088 -0,52 to 0,34  | No           | ns      | >0,999           |
| 5                                 |            | -0,17 -0,60 to 0,26   | No           | ns      | 0,921            |
| 6                                 |            | 0,076 -0,36 to 0,51   | No           | ns      | >0,999           |
| 8                                 |            | 0,047 -0,38 to 0,48   | No           | ns      | >0,999           |

| Test details         | Mean 1 | Mean 2 | Mean Diff, | SE of diff, | N1   | N2 | t | DF   |    |
|----------------------|--------|--------|------------|-------------|------|----|---|------|----|
| Carrageenan - Saline |        |        |            |             |      |    |   |      |    |
| 0                    |        | 0,53   | 0,48       | 0,059       | 0,15 | 3  | 3 | 0,41 | 36 |
| 0.5                  |        | 0,071  | 0,63       | -0,56       | 0,15 | 3  | 3 | 3,8  | 36 |
| 1                    |        | 0,091  | 0,6        | -0,51       | 0,15 | 3  | 3 | 3,5  | 36 |
| 2                    |        | 0,074  | 0,57       | -0,5        | 0,15 | 3  | 3 | 3,4  | 36 |
| 3                    |        | 0,14   | 0,6        | -0,46       | 0,15 | 3  | 3 | 3,2  | 36 |
| 4                    |        | 0,52   | 0,61       | -0,088      | 0,15 | 3  | 3 | 0,6  | 36 |
| 5                    |        | 0,44   | 0,61       | -0,17       | 0,15 | 3  | 3 | 1,2  | 36 |
| 6                    |        | 0,62   | 0,55       | 0,076       | 0,15 | 3  | 3 | 0,52 | 36 |
| 8                    |        | 0,6    | 0,55       | 0,047       | 0,15 | 3  | 3 | 0,32 | 36 |

Fig 1B

| Two-way ANOVA                 |                      | Ordinary      |                 |              |                  |          |
|-------------------------------|----------------------|---------------|-----------------|--------------|------------------|----------|
| Alpha                         |                      | 0,05          |                 |              |                  |          |
| Source of Variation           | % of total variation | P value       | P value summary | Significant? |                  |          |
| Interaction                   | 9.7                  | 0,085         | ns              | No           |                  |          |
| Time                          | 6.6                  | 0,0115        | *               | Yes          |                  |          |
| Cell type                     | 32                   | <0,0001       | ****            | Yes          |                  |          |
| ANOVA table                   |                      | SS (Type III) | DF              | MS           | F (DFn, DFd)     | P value  |
| Interaction                   |                      | 4262966       | 12              | 355247       | F (12, 92) = 1.7 | P=0,0850 |
| Time                          |                      | 2917241       | 4               | 729310       | F (4, 92) = 3,4  | P=0,0115 |
| Cell type                     |                      | 14240042      | 3               | 4746681      | F (3, 92) = 22   | P<0,0001 |
| Residual                      |                      | 19503313      | 92              | 211993       |                  |          |
| Data summary                  |                      |               |                 |              |                  |          |
| Number of columns (Cell type) |                      | 4             |                 |              |                  |          |
| Number of rows (Time)         |                      | 5             |                 |              |                  |          |
| Number of values              |                      | 112           |                 |              |                  |          |

**Within each column, compare rows (simple effects within columns)**

Number of families 4  
 Number of comparisons per family 4  
 Alpha 0,05

| Dunnett's multiple comparisons to Predicted (LS) mean diff, | 95,00% CI of diff, | Significant?  | Summary | Adjusted P Value |         |
|-------------------------------------------------------------|--------------------|---------------|---------|------------------|---------|
| <b>F4/80</b>                                                |                    |               |         |                  |         |
| 0 vs. 1                                                     | -369               | -897 to 159   | No      | ns               | 0,2629  |
| 0 vs. 2                                                     | -296               | -824 to 232   | No      | ns               | 0,4636  |
| 0 vs. 3                                                     | -1136              | -1664 to -608 | Yes     | ****             | <0,0001 |
| 0 vs. 7                                                     | -35                | -703 to 633   | No      | ns               | 0,9998  |
| <b>CD3+</b>                                                 |                    |               |         |                  |         |
| 0 vs. 1                                                     | -15                | -725 to 694   | No      | ns               | >0,9999 |
| 0 vs. 2                                                     | -11                | -721 to 699   | No      | ns               | >0,9999 |
| 0 vs. 3                                                     | -57                | -767 to 653   | No      | ns               | 0,999   |
| 0 vs. 7                                                     | -39                | -749 to 670   | No      | ns               | 0,9998  |
| <b>CD19+</b>                                                |                    |               |         |                  |         |
| 0 vs. 1                                                     | -4                 | -714 to 705   | No      | ns               | >0,9999 |
| 0 vs. 2                                                     | -1,8               | -711 to 708   | No      | ns               | >0,9999 |
| 0 vs. 3                                                     | -12                | -721 to 698   | No      | ns               | >0,9999 |
| 0 vs. 7                                                     | -10                | -720 to 699   | No      | ns               | >0,9999 |
| <b>Other</b>                                                |                    |               |         |                  |         |
| 0 vs. 1                                                     | 273                | -437 to 983   | No      | ns               | 0,7722  |
| 0 vs. 2                                                     | 316                | -393 to 1026  | No      | ns               | 0,6692  |
| 0 vs. 3                                                     | -593               | -1302 to 117  | No      | ns               | 0,133   |
| 0 vs. 7                                                     | -51                | -761 to 658   | No      | ns               | 0,9993  |

| Test details | Predicted (LS) mean 1 | Predicted (LS) mean 2 | Predicted (LS) mean diff, | SE of diff, | N1 | N2 | q      | DF |
|--------------|-----------------------|-----------------------|---------------------------|-------------|----|----|--------|----|
| <b>F4/80</b> |                       |                       |                           |             |    |    |        |    |
| 0 vs. 1      | 374                   | 743                   | -369                      | 210         | 12 | 8  | 1,8    | 92 |
| 0 vs. 2      | 374                   | 670                   | -296                      | 210         | 12 | 8  | 1,4    | 92 |
| 0 vs. 3      | 374                   | 1510                  | -1136                     | 210         | 12 | 8  | 5,4    | 92 |
| 0 vs. 7      | 374                   | 409                   | -35                       | 266         | 12 | 4  | 0,13   | 92 |
| <b>CD3+</b>  |                       |                       |                           |             |    |    |        |    |
| 0 vs. 1      | 31                    | 46                    | -15                       | 282         | 8  | 4  | 0,055  | 92 |
| 0 vs. 2      | 31                    | 42                    | -11                       | 282         | 8  | 4  | 0,039  | 92 |
| 0 vs. 3      | 31                    | 88                    | -57                       | 282         | 8  | 4  | 0,2    | 92 |
| 0 vs. 7      | 31                    | 70                    | -39                       | 282         | 8  | 4  | 0,14   | 92 |
| <b>CD19+</b> |                       |                       |                           |             |    |    |        |    |
| 0 vs. 1      | 13                    | 17                    | -4                        | 282         | 8  | 4  | 0,014  | 92 |
| 0 vs. 2      | 13                    | 15                    | -1,8                      | 282         | 8  | 4  | 0,0065 | 92 |
| 0 vs. 3      | 13                    | 25                    | -12                       | 282         | 8  | 4  | 0,042  | 92 |
| 0 vs. 7      | 13                    | 23                    | -10                       | 282         | 8  | 4  | 0,037  | 92 |
| <b>Other</b> |                       |                       |                           |             |    |    |        |    |
| 0 vs. 1      | 844                   | 571                   | 273                       | 282         | 8  | 4  | 0,97   | 92 |
| 0 vs. 2      | 844                   | 528                   | 316                       | 282         | 8  | 4  | 1,1    | 92 |
| 0 vs. 3      | 844                   | 1437                  | -593                      | 282         | 8  | 4  | 2,1    | 92 |
| 0 vs. 7      | 844                   | 895                   | -51                       | 282         | 8  | 4  | 0,18   | 92 |

Fig 1C

Two-way RM ANOVA      Matching: Stacked  
 Assume sphericity?      Yes  
 Alpha                      0,05

| Source of Variation | % of total variation | P value | P value summary | Significant? |
|---------------------|----------------------|---------|-----------------|--------------|
| Time x Treatment    | 14                   | <0,001  | ****            | Yes          |
| Time                | 61                   | <0,001  | ****            | Yes          |
| Treatment           | 11                   | <0,001  | ****            | Yes          |
| Subject             | 1,9                  | 0,459   | ns              | No           |

| ANOVA table      | SS    | DF | MS    | F (DFn, DFd)     | P value |
|------------------|-------|----|-------|------------------|---------|
| Time x Treatment | 0,66  | 7  | 0,094 | F (7, 63) = 9,3  | P<0,001 |
| Time             | 3     | 7  | 0,43  | F (7, 63) = 42   | P<0,001 |
| Treatment        | 0,52  | 1  | 0,52  | F (1, 9) = 52    | P<0,001 |
| Subject          | 0,091 | 9  | 0,01  | F (9, 63) = 0,99 | P=0,459 |
| Residual         | 0,64  | 63 | 0,01  |                  |         |

Difference between column means  
 Mean of Depleted Carragee 0,15  
 Mean of Non-depleted Car 0,31  
 Difference between means -0,16  
 SE of difference            0,022  
 95% CI of difference      -0,21 to -0,11

Data summary  
 Number of columns (Treatr 2  
 Number of rows (Time) 8  
 Number of subjects (Subje 11  
 Number of missing values 0

Compare each cell mean with the other cell mean in that row

Number of families            1  
 Number of comparisons pe 8  
 Alpha                          0,05

| Sidak's multiple comparison                     | Predicted (LS) mean diff, | 95,00% CI of diff, | Significant? | Summary | Adjusted P Value |
|-------------------------------------------------|---------------------------|--------------------|--------------|---------|------------------|
| Depleted Carrageenan - Non-depleted Carrageenan |                           |                    |              |         |                  |
| 0                                               | -0,084                    | -0,26 to 0,093     | No           | ns      | 0,807            |
| 0,5                                             | 0,012                     | -0,17 to 0,19      | No           | ns      | >0,999           |
| 1                                               | 0,002                     | -0,18 to 0,18      | No           | ns      | >0,999           |
| 2                                               | 0,014                     | -0,16 to 0,19      | No           | ns      | >0,999           |
| 3                                               | -0,087                    | -0,26 to 0,091     | No           | ns      | 0,78             |
| 4                                               | -0,28                     | -0,46 to -0,10     | Yes          | ***     | <0,001           |
| 5                                               | -0,47                     | -0,65 to -0,30     | Yes          | ****    | <0,001           |
| 6                                               | -0,38                     | -0,56 to -0,21     | Yes          | ****    | <0,001           |

| Test details                                    | Predicted (LS) mean 1 | Predicted (LS) mean 2 | Predicted (LS) mean diff, | SE of diff, | N1 | N2 | t     | DF |
|-------------------------------------------------|-----------------------|-----------------------|---------------------------|-------------|----|----|-------|----|
| Depleted Carrageenan - Non-depleted Carrageenan |                       |                       |                           |             |    |    |       |    |
| 0                                               | 0,61                  | 0,69                  | -0,084                    | 0,063       | 7  | 4  | 1,3   | 72 |
| 0,5                                             | 0,047                 | 0,035                 | 0,012                     | 0,063       | 7  | 4  | 0,19  | 72 |
| 1                                               | 0,054                 | 0,052                 | 0,002                     | 0,063       | 7  | 4  | 0,031 | 72 |
| 2                                               | 0,077                 | 0,064                 | 0,014                     | 0,063       | 7  | 4  | 0,22  | 72 |
| 3                                               | 0,095                 | 0,18                  | -0,087                    | 0,063       | 7  | 4  | 1,4   | 72 |
| 4                                               | 0,093                 | 0,37                  | -0,28                     | 0,063       | 7  | 4  | 4,4   | 72 |
| 5                                               | 0,092                 | 0,57                  | -0,47                     | 0,063       | 7  | 4  | 7,5   | 72 |
| 6                                               | 0,1                   | 0,49                  | -0,38                     | 0,063       | 7  | 4  | 6,1   | 72 |

Fig 1D

Two-way RM ANOVA Matching: Stacked  
 Assume sphericity? Yes  
 Alpha 0,05

| Source of Variation | % of total variation | P value | P value summary | Significant? |
|---------------------|----------------------|---------|-----------------|--------------|
| Time x Treatment    | 7,2                  | 0,014   | *               | Yes          |
| Time                | 58                   | <0,001  | ****            | Yes          |
| Treatment           | 5,3                  | 0,023   | *               | Yes          |
| Subject             | 5,4                  | 0,09    | ns              | No           |

| ANOVA table      | SS   | DF | MS    | F (DFn, DFd)    | P value |
|------------------|------|----|-------|-----------------|---------|
| Time x Treatment | 0,2  | 7  | 0,029 | F (7, 56) = 2,8 | P=0,014 |
| Time             | 1,6  | 7  | 0,23  | F (7, 56) = 23  | P<0,001 |
| Treatment        | 0,15 | 1  | 0,15  | F (1, 8) = 7,9  | P=0,023 |
| Subject          | 0,15 | 8  | 0,019 | F (8, 56) = 1,8 | P=0,090 |
| Residual         | 0,58 | 56 | 0,01  |                 |         |

Difference between column means  
 Mean of depl-veh 0,14  
 Mean of depl-MN 0,23  
 Difference between means -0,088  
 SE of difference 0,031  
 95% CI of difference -0,16 to -0,016

Data summary  
 Number of columns (Treatr 2  
 Number of rows (Time) 8  
 Number of subjects (Subje 10  
 Number of missing values 0

Compare each cell mean with the other cell mean in that row

Number of families 1  
 Number of comparisons per 8  
 Alpha 0,05

| Sidak's multiple comparison | Predicted (LS) mean diff, | 95,00% CI of diff, | Significant? | Summary | Adjusted P Value |
|-----------------------------|---------------------------|--------------------|--------------|---------|------------------|
| depl-veh - depl-MN          |                           |                    |              |         |                  |
| 0                           | -0,0066                   | -0,20 to 0,19      | No           | ns      | >0,999           |
| 2                           | -0,0056                   | -0,20 to 0,19      | No           | ns      | >0,999           |
| 3                           | -0,00082                  | -0,19 to 0,19      | No           | ns      | >0,999           |
| 6                           | -0,021                    | -0,22 to 0,17      | No           | ns      | >0,999           |
| 6,05                        | -0,047                    | -0,24 to 0,15      | No           | ns      | 0,996            |
| 6,15                        | -0,11                     | -0,31 to 0,081     | No           | ns      | 0,592            |
| 6,7                         | -0,28                     | -0,47 to -0,081    | Yes          | **      | 0,001            |
| 7                           | -0,23                     | -0,43 to -0,041    | Yes          | **      | 0,009            |

| Test details       | Predicted (LS) mean 1 | Predicted (LS) mean 2 | Predicted (LS) mean diff, | SE of diff, | N1 | N2 | t     | DF |
|--------------------|-----------------------|-----------------------|---------------------------|-------------|----|----|-------|----|
| depl-veh - depl-MN |                       |                       |                           |             |    |    |       |    |
| 0                  | 0,53                  | 0,54                  | -0,0066                   | 0,069       | 4  | 6  | 0,096 | 64 |
| 2                  | 0,055                 | 0,061                 | -0,0056                   | 0,069       | 4  | 6  | 0,081 | 64 |
| 3                  | 0,071                 | 0,072                 | -0,00082                  | 0,069       | 4  | 6  | 0,012 | 64 |
| 6                  | 0,077                 | 0,099                 | -0,021                    | 0,069       | 4  | 6  | 0,31  | 64 |
| 6,05               | 0,1                   | 0,15                  | -0,047                    | 0,069       | 4  | 6  | 0,68  | 64 |
| 6,15               | 0,11                  | 0,22                  | -0,11                     | 0,069       | 4  | 6  | 1,6   | 64 |
| 6,7                | 0,1                   | 0,38                  | -0,28                     | 0,069       | 4  | 6  | 4     | 64 |
| 7                  | 0,097                 | 0,33                  | -0,23                     | 0,069       | 4  | 6  | 3,4   | 64 |

Fig 1E

| Two-way RM ANOVA                |                      | Matching: Stacked |                 |                  |         |
|---------------------------------|----------------------|-------------------|-----------------|------------------|---------|
| Assume sphericity?              | Yes                  |                   |                 |                  |         |
| Alpha                           | 0,05                 |                   |                 |                  |         |
| Source of Variation             | % of total variation | P value           | P value summary | Significant?     |         |
| Time x Treatment                | 24                   | <0,001            | ****            | Yes              |         |
| Time                            | 41                   | <0,001            | ****            | Yes              |         |
| Treatment                       | 21                   | <0,001            | ****            | Yes              |         |
| Subject                         | 0,73                 | 0,825             | ns              | No               |         |
| ANOVA table                     | SS                   | DF                | MS              | F (DFn, DFd)     | P value |
| Time x Treatment                | 1,5                  | 10                | 0,15            | F (10, 80) = 14  | P<0,001 |
| Time                            | 2,6                  | 10                | 0,26            | F (10, 80) = 24  | P<0,001 |
| Treatment                       | 1,3                  | 1                 | 1,3             | F (1, 8) = 232   | P<0,001 |
| Subject                         | 0,046                | 8                 | 0,0058          | F (8, 80) = 0,54 | P=0,825 |
| Residual                        | 0,86                 | 80                | 0,011           |                  |         |
| Difference between column means |                      |                   |                 |                  |         |
| Mean of Depleted carr M1        | 0,088                |                   |                 |                  |         |
| Mean of Depleted carr M2        | 0,31                 |                   |                 |                  |         |
| Difference between means        | -0,22                |                   |                 |                  |         |
| SE of difference                | 0,015                |                   |                 |                  |         |
| 95% CI of difference            | -0,25 to -0,19       |                   |                 |                  |         |
| Data summary                    |                      |                   |                 |                  |         |
| Number of columns (Treatment)   | 2                    |                   |                 |                  |         |
| Number of rows (Time)           | 11                   |                   |                 |                  |         |
| Number of subjects (Subject)    | 10                   |                   |                 |                  |         |
| Number of missing values        | 0                    |                   |                 |                  |         |

Compare each cell mean with the other cell mean in that row

| Number of families                  |            | Number of comparisons per family |              | Alpha       |                  |    |       |    |
|-------------------------------------|------------|----------------------------------|--------------|-------------|------------------|----|-------|----|
| Number of families                  | 1          |                                  |              |             |                  |    |       |    |
| Number of comparisons per family    | 11         |                                  |              |             |                  |    |       |    |
| Alpha                               | 0,05       |                                  |              |             |                  |    |       |    |
| Sidak's multiple comparisons test   | Mean Diff. | 95,00% CI of diff.               | Significant? | Summary     | Adjusted P Value |    |       |    |
| Depleted carr M1 - Depleted carr M2 |            |                                  |              |             |                  |    |       |    |
| 0                                   | 0,012      | -0,17 to 0,20                    | No           | ns          | >0,999           |    |       |    |
| 2                                   | 0,012      | -0,18 to 0,20                    | No           | ns          | >0,999           |    |       |    |
| 4                                   | 0,0074     | -0,18 to 0,19                    | No           | ns          | >0,999           |    |       |    |
| 6                                   | -0,0033    | -0,19 to 0,18                    | No           | ns          | >0,999           |    |       |    |
| 6,05                                | -0,023     | -0,21 to 0,16                    | No           | ns          | >0,999           |    |       |    |
| 6,15                                | -0,099     | -0,29 to 0,088                   | No           | ns          | 0,778            |    |       |    |
| 6,7                                 | -0,32      | -0,51 to -0,14                   | Yes          | ****        | <0,001           |    |       |    |
| 7                                   | -0,49      | -0,68 to -0,31                   | Yes          | ****        | <0,001           |    |       |    |
| 8                                   | -0,45      | -0,64 to -0,26                   | Yes          | ****        | <0,001           |    |       |    |
| 9                                   | -0,6       | -0,79 to -0,42                   | Yes          | ****        | <0,001           |    |       |    |
| 10                                  | -0,47      | -0,66 to -0,28                   | Yes          | ****        | <0,001           |    |       |    |
| Test details                        |            |                                  |              |             |                  |    |       |    |
|                                     | Mean 1     | Mean 2                           | Mean Diff.   | SE of diff. | N1               | N2 | t     | DF |
| Depleted carr M1 - Depleted carr M2 |            |                                  |              |             |                  |    |       |    |
| 0                                   | 0,52       | 0,51                             | 0,012        | 0,064       | 5                | 5  | 0,19  | 88 |
| 2                                   | 0,04       | 0,028                            | 0,012        | 0,064       | 5                | 5  | 0,18  | 88 |
| 4                                   | 0,039      | 0,032                            | 0,0074       | 0,064       | 5                | 5  | 0,12  | 88 |
| 6                                   | 0,041      | 0,044                            | -0,0033      | 0,064       | 5                | 5  | 0,052 | 88 |
| 6,05                                | 0,034      | 0,058                            | -0,023       | 0,064       | 5                | 5  | 0,36  | 88 |
| 6,15                                | 0,039      | 0,14                             | -0,099       | 0,064       | 5                | 5  | 1,5   | 88 |
| 6,7                                 | 0,046      | 0,37                             | -0,32        | 0,064       | 5                | 5  | 5     | 88 |
| 7                                   | 0,062      | 0,56                             | -0,49        | 0,064       | 5                | 5  | 7,7   | 88 |
| 8                                   | 0,056      | 0,51                             | -0,45        | 0,064       | 5                | 5  | 7     | 88 |
| 9                                   | 0,044      | 0,65                             | -0,6         | 0,064       | 5                | 5  | 9,4   | 88 |
| 10                                  | 0,054      | 0,52                             | -0,47        | 0,064       | 5                | 5  | 7,3   | 88 |

**Fig 2A**

Table Analyzed IB lysM MitoDendra mice

Column B ipsi  
vs. vs,  
Column A contra

## Paired t test

P value 0,0204  
P value summary \*  
Significantly different ( $P < 0.05$ )? Yes  
One- or two-tailed P value? Two-tailed  
t, df  $t=3,347$ ,  $df=5$   
Number of pairs 6

## How big is the difference?

Mean of differences (B - A) 2,954  
SD of differences 2,162  
SEM of differences 0,8827  
95% confidence interval 0,6854 to 5,223  
R squared (partial eta squared) 0,6914

## How effective was the pairing?

Correlation coefficient (r) -0,0783  
P value (one tailed) 0,4414  
P value summary ns  
Was the pairing significantly effec No

Fig 2C

ANOVA summary

|                                           |        |
|-------------------------------------------|--------|
| F                                         | 10.21  |
| P value                                   | <0.001 |
| P value summary                           | ***    |
| Significant diff. among means (P < 0.05)? | Yes    |
| R squared                                 | 0.7185 |

Brown-Forsythe test

|                                             |                |
|---------------------------------------------|----------------|
| F (DFn, DFd)                                | 0.2093 (4, 16) |
| P value                                     | 0.93           |
| P value summary                             | ns             |
| Are SDs significantly different (P < 0.05)? | No             |

Bartlett's test

|                                             |  |
|---------------------------------------------|--|
| Bartlett's statistic (corrected)            |  |
| P value                                     |  |
| P value summary                             |  |
| Are SDs significantly different (P < 0.05)? |  |

ANOVA table

|                             | SS          | DF | MS         | F (DFn, DFd)     | P value |
|-----------------------------|-------------|----|------------|------------------|---------|
| Treatment (between columns) | 21177550039 | 4  | 5294387510 | F(4, 16) = 10.21 | P<0.001 |
| Residual (within columns)   | 8298024613  | 16 | 518626538  |                  |         |
| Total                       | 29475574652 | 20 |            |                  |         |

Data summary

|                                |    |
|--------------------------------|----|
| Number of treatments (columns) | 5  |
| Number of values (total)       | 21 |

Number of families

|                                  |      |
|----------------------------------|------|
| Number of comparisons per family | 10   |
| Alpha                            | 0.05 |

Tukey's multiple comparisons test

|                                                            | Mean Diff. | 95.00% CI of diff. | Significant? | Summary | Adjusted P Value |     |
|------------------------------------------------------------|------------|--------------------|--------------|---------|------------------|-----|
| MMdtr + Carr + MF vs. MMdtr + vehicle + MF                 | 68534      | 24803 to 112265    | Yes          | **      | 0.002            | A-B |
| MMdtr + Carr + MF vs. MMdtr + Carr + Sonic MF              | 63860      | 15714 to 112006    | Yes          | **      | 0.007            | A-C |
| MMdtr + Carr + MF vs. WT + Carr + MF (resolved pain)       | 50349      | 6618 to 94080      | Yes          | *       | 0.02             | A-D |
| MMdtr + Carr + MF vs. MMdtr + Vehicle + PBS                | 79995      | 31849 to 128141    | Yes          | ***     | <0.001           | A-E |
| MMdtr + vehicle + MF vs. MMdtr + Carr + Sonic MF           | -4675      | -57962 to 48613    | No           | ns      | 0.999            | B-C |
| MMdtr + vehicle + MF vs. WT + Carr + MF (resolved pain)    | -18186     | -67520 to 31149    | No           | ns      | 0.789            | B-D |
| MMdtr + vehicle + MF vs. MMdtr + Vehicle + PBS             | 11461      | -41827 to 64749    | No           | ns      | 0.962            | B-E |
| MMdtr + Carr + Sonic MF vs. WT + Carr + MF (resolved pain) | -13511     | -66799 to 39777    | No           | ns      | 0.934            | C-D |
| MMdtr + Carr + Sonic MF vs. MMdtr + Vehicle + PBS          | 16136      | -40831 to 73103    | No           | ns      | 0.905            | C-E |
| WT + Carr + MF (resolved pain) vs. MMdtr + Vehicle + PBS   | 29647      | -23641 to 82934    | No           | ns      | 0.459            | D-E |

Test details

|                                                            | Mean 1 | Mean 2 | Mean Diff. | SE of diff. | n1 | n2 | q      | DF |
|------------------------------------------------------------|--------|--------|------------|-------------|----|----|--------|----|
| MMdtr + Carr + MF vs. MMdtr + vehicle + MF                 | 142572 | 74038  | 68534      | 14274       | 7  | 4  | 6.79   | 16 |
| MMdtr + Carr + MF vs. MMdtr + Carr + Sonic MF              | 142572 | 78712  | 63860      | 15715       | 7  | 3  | 5.747  | 16 |
| MMdtr + Carr + MF vs. WT + Carr + MF (resolved pain)       | 142572 | 92223  | 50349      | 14274       | 7  | 4  | 4.988  | 16 |
| MMdtr + Carr + MF vs. MMdtr + Vehicle + PBS                | 142572 | 62577  | 79995      | 15715       | 7  | 3  | 7.199  | 16 |
| MMdtr + vehicle + MF vs. MMdtr + Carr + Sonic MF           | 74038  | 78712  | -4675      | 17393       | 4  | 3  | 0.3801 | 16 |
| MMdtr + vehicle + MF vs. WT + Carr + MF (resolved pain)    | 74038  | 92223  | -18186     | 16103       | 4  | 4  | 1.597  | 16 |
| MMdtr + vehicle + MF vs. MMdtr + Vehicle + PBS             | 74038  | 62577  | 11461      | 17393       | 4  | 3  | 0.9319 | 16 |
| MMdtr + Carr + Sonic MF vs. WT + Carr + MF (resolved pain) | 78712  | 92223  | -13511     | 17393       | 3  | 4  | 1.099  | 16 |
| MMdtr + Carr + Sonic MF vs. MMdtr + Vehicle + PBS          | 78712  | 62577  | 16136      | 18594       | 3  | 3  | 1.227  | 16 |
| WT + Carr + MF (resolved pain) vs. MMdtr + Vehicle + PBS   | 92223  | 62577  | 29647      | 17393       | 4  | 3  | 2.41   | 16 |

Fig 2D

| Two-way RM ANOVA   |      | Matching: Stacked |  |
|--------------------|------|-------------------|--|
| Assume sphericity? | Yes  |                   |  |
| Alpha              | 0,05 |                   |  |

| Source of Variation | % of total variation | P value | P value summary | Significant? |
|---------------------|----------------------|---------|-----------------|--------------|
| Time x Treatment    | 13,51                | 0,036   | -               | Yes          |
| Time                | 7,507                | 0,005   | ..              | Yes          |
| Treatment           | 62,58                | <0,001  | ----            | Yes          |
| Subject             | 0,2945               | 0,979   | ns              | No           |

| ANOVA table      | SS     | DF | MS       | F (DFn, DFd)       | P value |
|------------------|--------|----|----------|--------------------|---------|
| Time x Treatment | 0,9537 | 30 | 0,03179  | F (30, 60) = 1,726 | P=0,036 |
| Time             | 0,53   | 10 | 0,053    | F (10, 60) = 2,878 | P=0,005 |
| Treatment        | 4,419  | 3  | 1,473    | F (3, 6) = 425,0   | P<0,001 |
| Subject          | 0,0208 | 6  | 0,003466 | F (6, 60) = 0,1882 | P=0,979 |
| Residual         | 1,105  | 60 | 0,01842  |                    |         |

## Data summary

|                               |    |
|-------------------------------|----|
| Number of columns (Treatment) | 4  |
| Number of rows (Time)         | 11 |
| Number of subjects (Subject)  | 10 |
| Number of missing values      | 0  |

Within each row, compare columns (simple effects within rows)

|                                  |      |
|----------------------------------|------|
| Number of families               | 11   |
| Number of comparisons per family | 3    |
| Alpha                            | 0,05 |

## Dunnett's multiple comparisons test

|                                                                   | Predicted (LS) mean diff. | 95.00% CI of diff.  | Significant? | Summary | Adjusted P Value |
|-------------------------------------------------------------------|---------------------------|---------------------|--------------|---------|------------------|
| 0                                                                 |                           |                     |              |         |                  |
| Depleted carr WT sup-mito vs. Depleted carr sonicated sup-mito    | -0,1094                   | -0,3975 to 0,1787   | No           | ns      | 0,698            |
| Depleted carr WT sup-mito vs. Depleted Vehicle sonicated sup-mito | 0,006109                  | -0,2820 to 0,2942   | No           | ns      | >0,999           |
| Depleted carr WT sup-mito vs. Depleted Vehicle WT sup-mito        | 0,03487                   | -0,2228 to 0,2926   | No           | ns      | 0,979            |
| 2                                                                 |                           |                     |              |         |                  |
| Depleted carr WT sup-mito vs. Depleted carr sonicated sup-mito    | -0,004295                 | -0,2924 to 0,2838   | No           | ns      | >0,999           |
| Depleted carr WT sup-mito vs. Depleted Vehicle sonicated sup-mito | -0,4481                   | -0,7362 to -0,1600  | Yes          | **      | 0,001            |
| Depleted carr WT sup-mito vs. Depleted Vehicle WT sup-mito        | -0,5237                   | -0,7814 to -0,2660  | Yes          | ***     | <0,001           |
| 4                                                                 |                           |                     |              |         |                  |
| Depleted carr WT sup-mito vs. Depleted carr sonicated sup-mito    | -0,004721                 | -0,2928 to 0,2834   | No           | ns      | >0,999           |
| Depleted carr WT sup-mito vs. Depleted Vehicle sonicated sup-mito | -0,548                    | -0,8361 to -0,2599  | Yes          | ***     | <0,001           |
| Depleted carr WT sup-mito vs. Depleted Vehicle WT sup-mito        | -0,436                    | -0,6937 to -0,1783  | Yes          | **      | <0,001           |
| 6                                                                 |                           |                     |              |         |                  |
| Depleted carr WT sup-mito vs. Depleted carr sonicated sup-mito    | 0,008612                  | -0,2795 to 0,2967   | No           | ns      | >0,999           |
| Depleted carr WT sup-mito vs. Depleted Vehicle sonicated sup-mito | -0,4534                   | -0,7415 to -0,1653  | Yes          | ***     | <0,001           |
| Depleted carr WT sup-mito vs. Depleted Vehicle WT sup-mito        | -0,4431                   | -0,7007 to -0,1854  | Yes          | **      | <0,001           |
| 6,05                                                              |                           |                     |              |         |                  |
| Depleted carr WT sup-mito vs. Depleted carr sonicated sup-mito    | 0,005837                  | -0,2823 to 0,2939   | No           | ns      | >0,999           |
| Depleted carr WT sup-mito vs. Depleted Vehicle sonicated sup-mito | -0,5092                   | -0,7973 to -0,2211  | Yes          | ***     | <0,001           |
| Depleted carr WT sup-mito vs. Depleted Vehicle WT sup-mito        | -0,4075                   | -0,6652 to -0,1498  | Yes          | **      | <0,001           |
| 6,15                                                              |                           |                     |              |         |                  |
| Depleted carr WT sup-mito vs. Depleted carr sonicated sup-mito    | 0,1167                    | -0,1714 to 0,4048   | No           | ns      | 0,656            |
| Depleted carr WT sup-mito vs. Depleted Vehicle sonicated sup-mito | -0,4291                   | -0,7172 to -0,1410  | Yes          | **      | 0,002            |
| Depleted carr WT sup-mito vs. Depleted Vehicle WT sup-mito        | -0,2934                   | -0,5511 to -0,03575 | Yes          | *       | 0,021            |
| 6,7                                                               |                           |                     |              |         |                  |
| Depleted carr WT sup-mito vs. Depleted carr sonicated sup-mito    | 0,3434                    | 0,05532 to 0,6315   | Yes          | *       | 0,015            |
| Depleted carr WT sup-mito vs. Depleted Vehicle sonicated sup-mito | -0,07175                  | -0,3598 to 0,2163   | No           | ns      | 0,887            |
| Depleted carr WT sup-mito vs. Depleted Vehicle WT sup-mito        | -0,187                    | -0,4447 to 0,07066  | No           | ns      | 0,208            |
| 7                                                                 |                           |                     |              |         |                  |
| Depleted carr WT sup-mito vs. Depleted carr sonicated sup-mito    | 0,04919                   | -0,2389 to 0,3373   | No           | ns      | 0,959            |
| Depleted carr WT sup-mito vs. Depleted Vehicle sonicated sup-mito | -0,5251                   | -0,8132 to -0,2370  | Yes          | ***     | <0,001           |
| Depleted carr WT sup-mito vs. Depleted Vehicle WT sup-mito        | -0,5495                   | -0,8072 to -0,2918  | Yes          | ***     | <0,001           |
| 8                                                                 |                           |                     |              |         |                  |
| Depleted carr WT sup-mito vs. Depleted carr sonicated sup-mito    | 0,004768                  | -0,2833 to 0,2929   | No           | ns      | >0,999           |
| Depleted carr WT sup-mito vs. Depleted Vehicle sonicated sup-mito | -0,4107                   | -0,6988 to -0,1226  | Yes          | **      | 0,003            |
| Depleted carr WT sup-mito vs. Depleted Vehicle WT sup-mito        | -0,467                    | -0,7246 to -0,2093  | Yes          | **      | <0,001           |
| 9                                                                 |                           |                     |              |         |                  |
| Depleted carr WT sup-mito vs. Depleted carr sonicated sup-mito    | 0,002738                  | -0,2854 to 0,2908   | No           | ns      | >0,999           |
| Depleted carr WT sup-mito vs. Depleted Vehicle sonicated sup-mito | -0,4883                   | -0,7764 to -0,2002  | Yes          | ***     | <0,001           |
| Depleted carr WT sup-mito vs. Depleted Vehicle WT sup-mito        | -0,4555                   | -0,7132 to -0,1978  | Yes          | **      | <0,001           |
| 10                                                                |                           |                     |              |         |                  |
| Depleted carr WT sup-mito vs. Depleted carr sonicated sup-mito    | 0,001716                  | -0,2964 to 0,2899   | No           | ns      | >0,999           |
| Depleted carr WT sup-mito vs. Depleted Vehicle sonicated sup-mito | -0,4813                   | -0,7694 to -0,1932  | Yes          | ***     | <0,001           |
| Depleted carr WT sup-mito vs. Depleted Vehicle WT sup-mito        | -0,4193                   | -0,6769 to -0,1616  | Yes          | **      | <0,001           |

| Test details                                                      | Predicted (LS) mean 1 | Predicted (LS) mean 2 | Predicted (LS) mean diff. | SE of diff. | N1 | N2 | q       | DF |
|-------------------------------------------------------------------|-----------------------|-----------------------|---------------------------|-------------|----|----|---------|----|
| 0                                                                 |                       |                       |                           |             |    |    |         |    |
| Depleted carr WT sup-mito vs. Depleted carr sonicated sup-mito    | 0,5129                | 0,6223                | -0,1094                   | 0,1192      | 3  | 2  | 0,9176  | 66 |
| Depleted carr WT sup-mito vs. Depleted Vehicle sonicated sup-mito | 0,5129                | 0,5088                | 0,006109                  | 0,1192      | 3  | 2  | 0,05124 | 66 |
| Depleted carr WT sup-mito vs. Depleted Vehicle WT sup-mito        | 0,5129                | 0,478                 | 0,03487                   | 0,1066      | 3  | 3  | 0,327   | 66 |
| 2                                                                 |                       |                       |                           |             |    |    |         |    |
| Depleted carr WT sup-mito vs. Depleted carr sonicated sup-mito    | 0,02917               | 0,03346               | -0,004295                 | 0,1192      | 3  | 2  | 0,03602 | 66 |
| Depleted carr WT sup-mito vs. Depleted Vehicle sonicated sup-mito | 0,02917               | 0,4773                | -0,4481                   | 0,1192      | 3  | 2  | 3,758   | 66 |
| Depleted carr WT sup-mito vs. Depleted Vehicle WT sup-mito        | 0,02917               | 0,5529                | -0,5237                   | 0,1066      | 3  | 3  | 4,911   | 66 |
| 4                                                                 |                       |                       |                           |             |    |    |         |    |
| Depleted carr WT sup-mito vs. Depleted carr sonicated sup-mito    | 0,03711               | 0,04183               | -0,004721                 | 0,1192      | 3  | 2  | 0,03959 | 66 |
| Depleted carr WT sup-mito vs. Depleted Vehicle sonicated sup-mito | 0,03711               | 0,5852                | -0,548                    | 0,1192      | 3  | 2  | 4,597   | 66 |
| Depleted carr WT sup-mito vs. Depleted Vehicle WT sup-mito        | 0,03711               | 0,4731                | -0,436                    | 0,1066      | 3  | 3  | 4,089   | 66 |
| 6                                                                 |                       |                       |                           |             |    |    |         |    |
| Depleted carr WT sup-mito vs. Depleted carr sonicated sup-mito    | 0,06562               | 0,05701               | 0,008612                  | 0,1192      | 3  | 2  | 0,07224 | 66 |
| Depleted carr WT sup-mito vs. Depleted Vehicle sonicated sup-mito | 0,06562               | 0,519                 | -0,4534                   | 0,1192      | 3  | 2  | 3,803   | 66 |
| Depleted carr WT sup-mito vs. Depleted Vehicle WT sup-mito        | 0,06562               | 0,5087                | -0,4431                   | 0,1066      | 3  | 3  | 4,155   | 66 |
| 6,05                                                              |                       |                       |                           |             |    |    |         |    |
| Depleted carr WT sup-mito vs. Depleted carr sonicated sup-mito    | 0,06794               | 0,0621                | 0,005837                  | 0,1192      | 3  | 2  | 0,04896 | 66 |
| Depleted carr WT sup-mito vs. Depleted Vehicle sonicated sup-mito | 0,06794               | 0,5772                | -0,5092                   | 0,1192      | 3  | 2  | 4,271   | 66 |
| Depleted carr WT sup-mito vs. Depleted Vehicle WT sup-mito        | 0,06794               | 0,4754                | -0,4075                   | 0,1066      | 3  | 3  | 3,821   | 66 |
| 6,15                                                              |                       |                       |                           |             |    |    |         |    |
| Depleted carr WT sup-mito vs. Depleted carr sonicated sup-mito    | 0,1708                | 0,05407               | 0,1167                    | 0,1192      | 3  | 2  | 0,9787  | 66 |
| Depleted carr WT sup-mito vs. Depleted Vehicle sonicated sup-mito | 0,1708                | 0,5999                | -0,4291                   | 0,1192      | 3  | 2  | 3,599   | 66 |
| Depleted carr WT sup-mito vs. Depleted Vehicle WT sup-mito        | 0,1708                | 0,4642                | -0,2934                   | 0,1066      | 3  | 3  | 2,752   | 66 |
| 6,7                                                               |                       |                       |                           |             |    |    |         |    |
| Depleted carr WT sup-mito vs. Depleted carr sonicated sup-mito    | 0,4055                | 0,0621                | 0,3434                    | 0,1192      | 3  | 2  | 2,88    | 66 |
| Depleted carr WT sup-mito vs. Depleted Vehicle sonicated sup-mito | 0,4055                | 0,4773                | -0,07175                  | 0,1192      | 3  | 2  | 0,6018  | 66 |
| Depleted carr WT sup-mito vs. Depleted Vehicle WT sup-mito        | 0,4055                | 0,5925                | -0,187                    | 0,1066      | 3  | 3  | 1,754   | 66 |
| 7                                                                 |                       |                       |                           |             |    |    |         |    |
| Depleted carr WT sup-mito vs. Depleted carr sonicated sup-mito    | 0,09294               | 0,04375               | 0,04919                   | 0,1192      | 3  | 2  | 0,4126  | 66 |
| Depleted carr WT sup-mito vs. Depleted Vehicle sonicated sup-mito | 0,09294               | 0,6191                | -0,5251                   | 0,1192      | 3  | 2  | 4,405   | 66 |
| Depleted carr WT sup-mito vs. Depleted Vehicle WT sup-mito        | 0,09294               | 0,6424                | -0,5495                   | 0,1066      | 3  | 3  | 5,153   | 66 |
| 8                                                                 |                       |                       |                           |             |    |    |         |    |
| Depleted carr WT sup-mito vs. Depleted carr sonicated sup-mito    | 0,06687               | 0,0621                | 0,004768                  | 0,1192      | 3  | 2  | 0,03999 | 66 |
| Depleted carr WT sup-mito vs. Depleted Vehicle sonicated sup-mito | 0,06687               | 0,4776                | -0,4107                   | 0,1192      | 3  | 2  | 3,445   | 66 |
| Depleted carr WT sup-mito vs. Depleted Vehicle WT sup-mito        | 0,06687               | 0,5338                | -0,467                    | 0,1066      | 3  | 3  | 4,379   | 66 |
| 9                                                                 |                       |                       |                           |             |    |    |         |    |
| Depleted carr WT sup-mito vs. Depleted carr sonicated sup-mito    | 0,06883               | 0,06609               | 0,002738                  | 0,1192      | 3  | 2  | 0,02296 | 66 |
| Depleted carr WT sup-mito vs. Depleted Vehicle sonicated sup-mito | 0,06883               | 0,5571                | -0,4883                   | 0,1192      | 3  | 2  | 4,096   | 66 |
| Depleted carr WT sup-mito vs. Depleted Vehicle WT sup-mito        | 0,06883               | 0,5243                | -0,4555                   | 0,1066      | 3  | 3  | 4,272   | 66 |
| 10                                                                |                       |                       |                           |             |    |    |         |    |
| Depleted carr WT sup-mito vs. Depleted carr sonicated sup-mito    | 0,07584               | 0,07413               | 0,001716                  | 0,1192      | 3  | 2  | 0,01439 | 66 |
| Depleted carr WT sup-mito vs. Depleted Vehicle sonicated sup-mito | 0,07584               | 0,5571                | -0,4813                   | 0,1192      | 3  | 2  | 4,037   | 66 |
| Depleted carr WT sup-mito vs. Depleted Vehicle WT sup-mito        | 0,07584               | 0,4951                | -0,4193                   | 0,1066      | 3  | 3  | 3,932   | 66 |



Fig 2E

| Two-way RM ANOVA                                                                       |                      | Matching: Stacked  |                 |                      |                  |    |          |     |
|----------------------------------------------------------------------------------------|----------------------|--------------------|-----------------|----------------------|------------------|----|----------|-----|
| Assume sphericity?                                                                     | Yes                  |                    |                 |                      |                  |    |          |     |
| Alpha                                                                                  | 0,05                 |                    |                 |                      |                  |    |          |     |
| Source of Variation                                                                    | % of total variation | P value            | P value summary | Significant?         |                  |    |          |     |
| Time x Treatment                                                                       | 13,57                | <0,001             | ***             | Yes                  |                  |    |          |     |
| Time                                                                                   | 7,269                | <0,001             | ***             | Yes                  |                  |    |          |     |
| Treatment                                                                              | 51,46                | <0,001             | ****            | Yes                  |                  |    |          |     |
| Subject                                                                                | 3,25                 | 0,537              | ns              | No                   |                  |    |          |     |
| ANOVA table                                                                            | SS                   | DF                 | MS              | F (DFn, DFd)         | P value          |    |          |     |
| Time x Treatment                                                                       | 1,512                | 21                 | 0,07202         | F (21, 112) = 2,958  | P<0,001          |    |          |     |
| Time                                                                                   | 0,8104               | 7                  | 0,1158          | F (7, 112) = 4,755   | P<0,001          |    |          |     |
| Treatment                                                                              | 5,736                | 3                  | 1,912           | F (3, 16) = 84,44    | P<0,001          |    |          |     |
| Subject                                                                                | 0,3623               | 16                 | 0,02264         | F (16, 112) = 0,9301 | P=0,537          |    |          |     |
| Residual                                                                               | 2,727                | 112                | 0,02435         |                      |                  |    |          |     |
| Data summary                                                                           |                      |                    |                 |                      |                  |    |          |     |
| Number of columns (Treatment)                                                          | 4                    |                    |                 |                      |                  |    |          |     |
| Number of rows (Time)                                                                  | 8                    |                    |                 |                      |                  |    |          |     |
| Number of subjects (Subject)                                                           | 20                   |                    |                 |                      |                  |    |          |     |
| Number of missing values                                                               | 0                    |                    |                 |                      |                  |    |          |     |
| Within each row, compare columns (simple effects within rows)                          |                      |                    |                 |                      |                  |    |          |     |
| Number of families                                                                     | 8                    |                    |                 |                      |                  |    |          |     |
| Number of comparisons per family                                                       | 3                    |                    |                 |                      |                  |    |          |     |
| Alpha                                                                                  | 0,05                 |                    |                 |                      |                  |    |          |     |
| Dunnett's multiple comparisons test                                                    | Mean Diff,           | 95,00% CI of diff, | Significant?    | Summary              | Adjusted P Value |    |          |     |
| 0                                                                                      |                      |                    |                 |                      |                  |    |          |     |
| Depleted carr inhibited iso-mito (myxo) vs. Depleted Vehicle inhibited iso-mito (myxo) | 0,07681              | -0,1568 to 0,3104  | No              | ns                   | 0,774            |    |          |     |
| Depleted carr inhibited iso-mito (myxo) vs. Depleted carr intact iso-mito              | 0,02367              | -0,2099 to 0,2572  | No              | ns                   | 0,99             |    |          |     |
| Depleted carr inhibited iso-mito (myxo) vs. Depleted Vehicle intact iso-mito           | -0,02218             | -0,2558 to 0,2114  | No              | ns                   | 0,992            |    |          |     |
| 2                                                                                      |                      |                    |                 |                      |                  |    |          |     |
| Depleted carr inhibited iso-mito (myxo) vs. Depleted Vehicle inhibited iso-mito (myxo) | -0,4403              | -0,6739 to -0,2067 | Yes             | ****                 | <0,001           |    |          |     |
| Depleted carr inhibited iso-mito (myxo) vs. Depleted carr intact iso-mito              | 0,001053             | -0,2325 to 0,2346  | No              | ns                   | >0,999           |    |          |     |
| Depleted carr inhibited iso-mito (myxo) vs. Depleted Vehicle intact iso-mito           | -0,5371              | -0,7706 to -0,3035 | Yes             | ****                 | <0,001           |    |          |     |
| 4                                                                                      |                      |                    |                 |                      |                  |    |          |     |
| Depleted carr inhibited iso-mito (myxo) vs. Depleted Vehicle inhibited iso-mito (myxo) | -0,5378              | -0,7714 to -0,3043 | Yes             | ****                 | <0,001           |    |          |     |
| Depleted carr inhibited iso-mito (myxo) vs. Depleted carr intact iso-mito              | 0,01047              | -0,2231 to 0,2440  | No              | ns                   | >0,999           |    |          |     |
| Depleted carr inhibited iso-mito (myxo) vs. Depleted Vehicle intact iso-mito           | -0,513               | -0,7466 to -0,2795 | Yes             | ****                 | <0,001           |    |          |     |
| 6                                                                                      |                      |                    |                 |                      |                  |    |          |     |
| Depleted carr inhibited iso-mito (myxo) vs. Depleted Vehicle inhibited iso-mito (myxo) | -0,4086              | -0,6421 to -0,1750 | Yes             | ***                  | <0,001           |    |          |     |
| Depleted carr inhibited iso-mito (myxo) vs. Depleted carr intact iso-mito              | 0,01989              | -0,2137 to 0,2535  | No              | ns                   | 0,994            |    |          |     |
| Depleted carr inhibited iso-mito (myxo) vs. Depleted Vehicle intact iso-mito           | -0,4555              | -0,6891 to -0,2219 | Yes             | ****                 | <0,001           |    |          |     |
| 6,05                                                                                   |                      |                    |                 |                      |                  |    |          |     |
| Depleted carr inhibited iso-mito (myxo) vs. Depleted Vehicle inhibited iso-mito (myxo) | -0,4095              | -0,6430 to -0,1759 | Yes             | ***                  | <0,001           |    |          |     |
| Depleted carr inhibited iso-mito (myxo) vs. Depleted carr intact iso-mito              | 0,0008894            | -0,2327 to 0,2345  | No              | ns                   | >0,999           |    |          |     |
| Depleted carr inhibited iso-mito (myxo) vs. Depleted Vehicle intact iso-mito           | -0,4895              | -0,7231 to -0,2560 | Yes             | ****                 | <0,001           |    |          |     |
| 6,15                                                                                   |                      |                    |                 |                      |                  |    |          |     |
| Depleted carr inhibited iso-mito (myxo) vs. Depleted Vehicle inhibited iso-mito (myxo) | -0,4923              | -0,7259 to -0,2587 | Yes             | ****                 | <0,001           |    |          |     |
| Depleted carr inhibited iso-mito (myxo) vs. Depleted carr intact iso-mito              | -0,1402              | -0,3738 to 0,09337 | No              | ns                   | 0,349            |    |          |     |
| Depleted carr inhibited iso-mito (myxo) vs. Depleted Vehicle intact iso-mito           | -0,3657              | -0,5993 to -0,1321 | Yes             | ***                  | <0,001           |    |          |     |
| 6,7                                                                                    |                      |                    |                 |                      |                  |    |          |     |
| Depleted carr inhibited iso-mito (myxo) vs. Depleted Vehicle inhibited iso-mito (myxo) | -0,3896              | -0,6231 to -0,1560 | Yes             | ***                  | <0,001           |    |          |     |
| Depleted carr inhibited iso-mito (myxo) vs. Depleted carr intact iso-mito              | -0,3425              | -0,5761 to -0,1089 | Yes             | **                   | 0,002            |    |          |     |
| Depleted carr inhibited iso-mito (myxo) vs. Depleted Vehicle intact iso-mito           | -0,5259              | -0,7595 to -0,2923 | Yes             | ****                 | <0,001           |    |          |     |
| 7                                                                                      |                      |                    |                 |                      |                  |    |          |     |
| Depleted carr inhibited iso-mito (myxo) vs. Depleted Vehicle inhibited iso-mito (myxo) | -0,5195              | -0,7531 to -0,2860 | Yes             | ****                 | <0,001           |    |          |     |
| Depleted carr inhibited iso-mito (myxo) vs. Depleted carr intact iso-mito              | -0,4091              | -0,2745 to 0,1927  | No              | ns                   | 0,954            |    |          |     |
| Depleted carr inhibited iso-mito (myxo) vs. Depleted Vehicle intact iso-mito           | -0,4512              | -0,6848 to -0,2176 | Yes             | ****                 | <0,001           |    |          |     |
| Test details                                                                           | Mean 1               | Mean 2             | Mean Diff,      | SE of diff,          | N1               | N2 | q        | DF  |
| 0                                                                                      |                      |                    |                 |                      |                  |    |          |     |
| Depleted carr inhibited iso-mito (myxo) vs. Depleted Vehicle inhibited iso-mito (myxo) | 0,5281               | 0,4513             | 0,07681         | 0,09825              | 5                | 5  | 0,7818   | 128 |
| Depleted carr inhibited iso-mito (myxo) vs. Depleted carr intact iso-mito              | 0,5281               | 0,5044             | 0,02367         | 0,09825              | 5                | 5  | 0,2409   | 128 |
| Depleted carr inhibited iso-mito (myxo) vs. Depleted Vehicle intact iso-mito           | 0,5281               | 0,5503             | -0,02218        | 0,09825              | 5                | 5  | 0,2257   | 128 |
| 2                                                                                      |                      |                    |                 |                      |                  |    |          |     |
| Depleted carr inhibited iso-mito (myxo) vs. Depleted Vehicle inhibited iso-mito (myxo) | 0,04828              | 0,4886             | -0,4403         | 0,09825              | 5                | 5  | 4,481    | 128 |
| Depleted carr inhibited iso-mito (myxo) vs. Depleted carr intact iso-mito              | 0,04828              | 0,04723            | 0,001053        | 0,09825              | 5                | 5  | 0,01071  | 128 |
| Depleted carr inhibited iso-mito (myxo) vs. Depleted Vehicle intact iso-mito           | 0,04828              | 0,5853             | -0,5371         | 0,09825              | 5                | 5  | 5,466    | 128 |
| 4                                                                                      |                      |                    |                 |                      |                  |    |          |     |
| Depleted carr inhibited iso-mito (myxo) vs. Depleted Vehicle inhibited iso-mito (myxo) | 0,04847              | 0,5863             | -0,5378         | 0,09825              | 5                | 5  | 5,474    | 128 |
| Depleted carr inhibited iso-mito (myxo) vs. Depleted carr intact iso-mito              | 0,04847              | 0,038              | 0,01047         | 0,09825              | 5                | 5  | 0,1065   | 128 |
| Depleted carr inhibited iso-mito (myxo) vs. Depleted Vehicle intact iso-mito           | 0,04847              | 0,5615             | -0,513          | 0,09825              | 5                | 5  | 5,222    | 128 |
| 6                                                                                      |                      |                    |                 |                      |                  |    |          |     |
| Depleted carr inhibited iso-mito (myxo) vs. Depleted Vehicle inhibited iso-mito (myxo) | 0,07008              | 0,4786             | -0,4086         | 0,09825              | 5                | 5  | 4,158    | 128 |
| Depleted carr inhibited iso-mito (myxo) vs. Depleted carr intact iso-mito              | 0,07008              | 0,05019            | 0,01989         | 0,09825              | 5                | 5  | 0,2025   | 128 |
| Depleted carr inhibited iso-mito (myxo) vs. Depleted Vehicle intact iso-mito           | 0,07008              | 0,5256             | -0,4555         | 0,09825              | 5                | 5  | 4,636    | 128 |
| 6,05                                                                                   |                      |                    |                 |                      |                  |    |          |     |
| Depleted carr inhibited iso-mito (myxo) vs. Depleted Vehicle inhibited iso-mito (myxo) | 0,07209              | 0,4815             | -0,4095         | 0,09825              | 5                | 5  | 4,167    | 128 |
| Depleted carr inhibited iso-mito (myxo) vs. Depleted carr intact iso-mito              | 0,07209              | 0,0712             | 0,0008894       | 0,09825              | 5                | 5  | 0,009052 | 128 |
| Depleted carr inhibited iso-mito (myxo) vs. Depleted Vehicle intact iso-mito           | 0,07209              | 0,5616             | -0,4895         | 0,09825              | 5                | 5  | 4,983    | 128 |
| 6,15                                                                                   |                      |                    |                 |                      |                  |    |          |     |
| Depleted carr inhibited iso-mito (myxo) vs. Depleted Vehicle inhibited iso-mito (myxo) | 0,09539              | 0,5877             | -0,4923         | 0,09825              | 5                | 5  | 5,01     | 128 |
| Depleted carr inhibited iso-mito (myxo) vs. Depleted carr intact iso-mito              | 0,09539              | 0,2356             | -0,1402         | 0,09825              | 5                | 5  | 1,427    | 128 |
| Depleted carr inhibited iso-mito (myxo) vs. Depleted Vehicle intact iso-mito           | 0,09539              | 0,4611             | -0,3657         | 0,09825              | 5                | 5  | 3,722    | 128 |
| 6,7                                                                                    |                      |                    |                 |                      |                  |    |          |     |
| Depleted carr inhibited iso-mito (myxo) vs. Depleted Vehicle inhibited iso-mito (myxo) | 0,0872               | 0,4768             | -0,3896         | 0,09825              | 5                | 5  | 3,965    | 128 |
| Depleted carr inhibited iso-mito (myxo) vs. Depleted carr intact iso-mito              | 0,0872               | 0,4297             | -0,3425         | 0,09825              | 5                | 5  | 3,486    | 128 |
| Depleted carr inhibited iso-mito (myxo) vs. Depleted Vehicle intact iso-mito           | 0,0872               | 0,6131             | -0,5259         | 0,09825              | 5                | 5  | 5,353    | 128 |
| 7                                                                                      |                      |                    |                 |                      |                  |    |          |     |
| Depleted carr inhibited iso-mito (myxo) vs. Depleted Vehicle inhibited iso-mito (myxo) | 0,08464              | 0,6042             | -0,5195         | 0,09825              | 5                | 5  | 5,288    | 128 |
| Depleted carr inhibited iso-mito (myxo) vs. Depleted carr intact iso-mito              | 0,08464              | 0,1256             | -0,04091        | 0,09825              | 5                | 5  | 0,4164   | 128 |
| Depleted carr inhibited iso-mito (myxo) vs. Depleted Vehicle intact iso-mito           | 0,08464              | 0,5359             | -0,4512         | 0,09825              | 5                | 5  | 4,593    | 128 |

Fig 3A

| Two-way RM ANOVA                                            |                      | Matching: Stacked   |                 |                   |                  |    |         |    |
|-------------------------------------------------------------|----------------------|---------------------|-----------------|-------------------|------------------|----|---------|----|
| Assume sphericity?                                          | Yes                  |                     |                 |                   |                  |    |         |    |
| Alpha                                                       | 0,05                 |                     |                 |                   |                  |    |         |    |
| Source of Variation                                         | % of total variation | P value             | P value summary | Significant?      |                  |    |         |    |
| Time x Column Factor                                        | 15,36                | <0,0001             | ****            | Yes               |                  |    |         |    |
| Time                                                        | 63,26                | <0,0001             | ****            | Yes               |                  |    |         |    |
| Column Factor                                               | 13,38                | 0,0001              | ***             | Yes               |                  |    |         |    |
| Subject                                                     | 2,143                | 0,0186              | *               | Yes               |                  |    |         |    |
| ANOVA table                                                 | SS                   | DF                  | MS              | F (DFn, DFd)      | P value          |    |         |    |
| Time x Column Factor                                        | 0,6257               | 7                   | 0,08939         | F (7, 56) = 20,99 | P<0,0001         |    |         |    |
| Time                                                        | 2,576                | 7                   | 0,3681          | F (7, 56) = 86,43 | P<0,0001         |    |         |    |
| Column Factor                                               | 0,5451               | 1                   | 0,5451          | F (1, 8) = 49,95  | P=0,0001         |    |         |    |
| Subject                                                     | 0,0873               | 8                   | 0,01091         | F (8, 56) = 2,562 | P=0,0186         |    |         |    |
| Residual                                                    | 0,2385               | 56                  | 0,004259        |                   |                  |    |         |    |
| Difference between column means                             |                      |                     |                 |                   |                  |    |         |    |
| Mean of WT                                                  | 0,279                |                     |                 |                   |                  |    |         |    |
| Mean of CD200R KO                                           | 0,1139               |                     |                 |                   |                  |    |         |    |
| Difference between means                                    | 0,1651               |                     |                 |                   |                  |    |         |    |
| SE of difference                                            | 0,02336              |                     |                 |                   |                  |    |         |    |
| 95% CI of difference                                        | 0,1112 to 0,2190     |                     |                 |                   |                  |    |         |    |
| Data summary                                                |                      |                     |                 |                   |                  |    |         |    |
| Number of columns (Column Factor)                           | 2                    |                     |                 |                   |                  |    |         |    |
| Number of rows (Time)                                       | 8                    |                     |                 |                   |                  |    |         |    |
| Number of subjects (Subject)                                | 10                   |                     |                 |                   |                  |    |         |    |
| Number of missing values                                    | 0                    |                     |                 |                   |                  |    |         |    |
| Compare each cell mean with the other cell mean in that row |                      |                     |                 |                   |                  |    |         |    |
| Number of families                                          | 1                    |                     |                 |                   |                  |    |         |    |
| Number of comparisons per family                            | 8                    |                     |                 |                   |                  |    |         |    |
| Alpha                                                       | 0,05                 |                     |                 |                   |                  |    |         |    |
| Sidak's multiple comparisons test                           | Mean Diff,           | 95,00% CI of diff,  | Significant?    | Summary           | Adjusted P Value |    |         |    |
| WT - CD200R KO                                              |                      |                     |                 |                   |                  |    |         |    |
| 0                                                           | 0,07702              | -0,05021 to 0,2043  | No              | ns                | 0,5407           |    |         |    |
| 1                                                           | 0,008858             | -0,1184 to 0,1361   | No              | ns                | >0,9999          |    |         |    |
| 2                                                           | 0,001166             | -0,1261 to 0,1284   | No              | ns                | >0,9999          |    |         |    |
| 3                                                           | 0,0186               | -0,1086 to 0,1458   | No              | ns                | 0,9999           |    |         |    |
| 4                                                           | 0,128                | 0,0007474 to 0,2552 | Yes             | *                 | 0,0478           |    |         |    |
| 6                                                           | 0,1771               | 0,04991 to 0,3044   | Yes             | **                | 0,0017           |    |         |    |
| 8                                                           | 0,4447               | 0,3175 to 0,5719    | Yes             | ****              | <0,0001          |    |         |    |
| 15                                                          | 0,4652               | 0,3380 to 0,5924    | Yes             | ****              | <0,0001          |    |         |    |
| Test details                                                |                      |                     |                 |                   |                  |    |         |    |
|                                                             | Mean 1               | Mean 2              | Mean Diff,      | SE of diff,       | N1               | N2 | t       | DF |
| WT - CD200R KO                                              |                      |                     |                 |                   |                  |    |         |    |
| 0                                                           | 0,6132               | 0,5362              | 0,07702         | 0,04512           | 5                | 5  | 1,707   | 64 |
| 1                                                           | 0,04282              | 0,03396             | 0,008858        | 0,04512           | 5                | 5  | 0,1963  | 64 |
| 2                                                           | 0,03391              | 0,03275             | 0,001166        | 0,04512           | 5                | 5  | 0,02585 | 64 |
| 3                                                           | 0,05094              | 0,03235             | 0,0186          | 0,04512           | 5                | 5  | 0,4121  | 64 |
| 4                                                           | 0,161                | 0,033               | 0,128           | 0,04512           | 5                | 5  | 2,836   | 64 |
| 6                                                           | 0,2474               | 0,07025             | 0,1771          | 0,04512           | 5                | 5  | 3,926   | 64 |
| 8                                                           | 0,5298               | 0,08505             | 0,4447          | 0,04512           | 5                | 5  | 9,855   | 64 |
| 15                                                          | 0,5531               | 0,08789             | 0,4652          | 0,04512           | 5                | 5  | 10,31   | 64 |

Fig 3B

| Two-way RM ANOVA                                                  |                           | Matching: Stacked   |                     |                   |                  |    |       |     |
|-------------------------------------------------------------------|---------------------------|---------------------|---------------------|-------------------|------------------|----|-------|-----|
| Assume sphericity?                                                | Yes                       |                     |                     |                   |                  |    |       |     |
| Alpha                                                             | 0.05                      |                     |                     |                   |                  |    |       |     |
| Source of Variation                                               | % of total variation      | P value             | P value summary     | Significant?      |                  |    |       |     |
| Time x Treatment                                                  | 13                        | <0.001              | ****                | Yes               |                  |    |       |     |
| Time                                                              | 8.9                       | <0.001              | ****                | Yes               |                  |    |       |     |
| Treatment                                                         | 51                        | <0.001              | ****                | Yes               |                  |    |       |     |
| Subject                                                           | 3.6                       | 0.338               | ns                  | No                |                  |    |       |     |
| ANOVA table                                                       |                           |                     |                     |                   |                  |    |       |     |
| Time x Treatment                                                  | SS                        | DF                  | MS                  | F (Dfn, DFd)      | P value          |    |       |     |
| Time                                                              | 2.2                       | 35                  | 0.064               | F (35, 182) = 3.0 | P<0.001          |    |       |     |
| Treatment                                                         | 1.5                       | 7                   | 0.22                | F (7, 182) = 10   | P<0.001          |    |       |     |
| Subject                                                           | 8.8                       | 5                   | 1.8                 | F (5, 26) = 74    | P<0.001          |    |       |     |
| Residual                                                          | 0.62                      | 26                  | 0.024               | F (26, 182) = 1.1 | P=0.338          |    |       |     |
| Data summary                                                      |                           |                     |                     |                   |                  |    |       |     |
| Number of columns (Treatment)                                     | 6                         |                     |                     |                   |                  |    |       |     |
| Number of rows (Time)                                             | 8                         |                     |                     |                   |                  |    |       |     |
| Number of subjects (Subject)                                      | 32                        |                     |                     |                   |                  |    |       |     |
| Number of missing values                                          | 0                         |                     |                     |                   |                  |    |       |     |
| Within each row, compare columns (simple effects within rows)     |                           |                     |                     |                   |                  |    |       |     |
| Number of families                                                | 8                         |                     |                     |                   |                  |    |       |     |
| Number of comparisons per family                                  | 5                         |                     |                     |                   |                  |    |       |     |
| Alpha                                                             | 0.05                      |                     |                     |                   |                  |    |       |     |
| Dunnett's multiple comparisons test                               | Predicted (LS) mean diff. | 95.00% CI of diff.  | Significant?        | Summary           | Adjusted P Value |    |       |     |
| 0                                                                 |                           |                     |                     |                   |                  |    |       |     |
| Carr - CD200R-/- - CD200R MF vs. Carr - CD200R-/- - Vehicle (n=5) | 0.064                     | -0.16 to 0.29       | No                  | ns                | 0.932            |    |       |     |
| Carr - CD200R-/- - CD200R MF vs. Saline - CD200R-/- - Vehicle     | 0.044                     | -0.18 to 0.27       | No                  | ns                | 0.985            |    |       |     |
| Carr - CD200R-/- - CD200R MF vs. Carr - CD200R-/- - WT MF         | -0.037                    | -0.28 to 0.19       | No                  | ns                | 0.993            |    |       |     |
| Carr - CD200R-/- - CD200R MF vs. Saline - CD200R-/- - WT MF       | 0.022                     | -0.21 to 0.25       | No                  | ns                | >0.999           |    |       |     |
| Carr - CD200R-/- - CD200R MF vs. Saline - CD200R-/- - CD200R MF   | 0.04                      | -0.18 to 0.26       | No                  | ns                | 0.988            |    |       |     |
| 2                                                                 |                           |                     |                     |                   |                  |    |       |     |
| Carr - CD200R-/- - CD200R MF vs. Carr - CD200R-/- - Vehicle (n=5) | -0.003                    | -0.23 to 0.22       | No                  | ns                | >0.999           |    |       |     |
| Carr - CD200R-/- - CD200R MF vs. Saline - CD200R-/- - Vehicle     | -0.49                     | -0.72 to -0.26      | Yes                 | ****              | <0.001           |    |       |     |
| Carr - CD200R-/- - CD200R MF vs. Carr - CD200R-/- - WT MF         | -0.003                    | -0.23 to 0.22       | No                  | ns                | >0.999           |    |       |     |
| Carr - CD200R-/- - CD200R MF vs. Saline - CD200R-/- - WT MF       | -0.47                     | -0.70 to -0.25      | Yes                 | ****              | <0.001           |    |       |     |
| Carr - CD200R-/- - CD200R MF vs. Saline - CD200R-/- - CD200R MF   | -0.42                     | -0.64 to -0.21      | Yes                 | ****              | <0.001           |    |       |     |
| 4                                                                 |                           |                     |                     |                   |                  |    |       |     |
| Carr - CD200R-/- - CD200R MF vs. Carr - CD200R-/- - Vehicle (n=5) | 0.0056                    | -0.22 to 0.23       | No                  | ns                | >0.999           |    |       |     |
| Carr - CD200R-/- - CD200R MF vs. Saline - CD200R-/- - Vehicle     | -0.51                     | -0.74 to -0.28      | Yes                 | ****              | <0.001           |    |       |     |
| Carr - CD200R-/- - CD200R MF vs. Carr - CD200R-/- - WT MF         | -0.012                    | -0.24 to 0.22       | No                  | ns                | >0.999           |    |       |     |
| Carr - CD200R-/- - CD200R MF vs. Saline - CD200R-/- - WT MF       | -0.37                     | -0.60 to -0.14      | Yes                 | ****              | <0.001           |    |       |     |
| Carr - CD200R-/- - CD200R MF vs. Saline - CD200R-/- - CD200R MF   | -0.52                     | -0.74 to -0.30      | Yes                 | ****              | <0.001           |    |       |     |
| 6                                                                 |                           |                     |                     |                   |                  |    |       |     |
| Carr - CD200R-/- - CD200R MF vs. Carr - CD200R-/- - Vehicle (n=5) | 0.0041                    | -0.22 to 0.23       | No                  | ns                | >0.999           |    |       |     |
| Carr - CD200R-/- - CD200R MF vs. Saline - CD200R-/- - Vehicle     | -0.37                     | -0.60 to -0.15      | Yes                 | ****              | <0.001           |    |       |     |
| Carr - CD200R-/- - CD200R MF vs. Carr - CD200R-/- - WT MF         | -0.0073                   | -0.23 to 0.22       | No                  | ns                | >0.999           |    |       |     |
| Carr - CD200R-/- - CD200R MF vs. Saline - CD200R-/- - WT MF       | -0.48                     | -0.71 to -0.25      | Yes                 | ****              | <0.001           |    |       |     |
| Carr - CD200R-/- - CD200R MF vs. Saline - CD200R-/- - CD200R MF   | -0.42                     | -0.63 to -0.20      | Yes                 | ****              | <0.001           |    |       |     |
| 6.05                                                              |                           |                     |                     |                   |                  |    |       |     |
| Carr - CD200R-/- - CD200R MF vs. Carr - CD200R-/- - Vehicle (n=5) | -0.0043                   | -0.23 to 0.22       | No                  | ns                | >0.999           |    |       |     |
| Carr - CD200R-/- - CD200R MF vs. Saline - CD200R-/- - Vehicle     | -0.45                     | -0.67 to -0.22      | Yes                 | ****              | <0.001           |    |       |     |
| Carr - CD200R-/- - CD200R MF vs. Carr - CD200R-/- - WT MF         | 0.0092                    | -0.22 to 0.24       | No                  | ns                | >0.999           |    |       |     |
| Carr - CD200R-/- - CD200R MF vs. Saline - CD200R-/- - WT MF       | -0.49                     | -0.72 to -0.27      | Yes                 | ****              | <0.001           |    |       |     |
| Carr - CD200R-/- - CD200R MF vs. Saline - CD200R-/- - CD200R MF   | -0.45                     | -0.67 to -0.23      | Yes                 | ****              | <0.001           |    |       |     |
| 6.15                                                              |                           |                     |                     |                   |                  |    |       |     |
| Carr - CD200R-/- - CD200R MF vs. Carr - CD200R-/- - Vehicle (n=5) | -0.0023                   | -0.23 to 0.22       | No                  | ns                | >0.999           |    |       |     |
| Carr - CD200R-/- - CD200R MF vs. Saline - CD200R-/- - Vehicle     | -0.44                     | -0.67 to -0.21      | Yes                 | ****              | <0.001           |    |       |     |
| Carr - CD200R-/- - CD200R MF vs. Carr - CD200R-/- - WT MF         | -0.036                    | -0.26 to 0.19       | No                  | ns                | 0.994            |    |       |     |
| Carr - CD200R-/- - CD200R MF vs. Saline - CD200R-/- - WT MF       | -0.54                     | -0.77 to -0.32      | Yes                 | ****              | <0.001           |    |       |     |
| Carr - CD200R-/- - CD200R MF vs. Saline - CD200R-/- - CD200R MF   | -0.43                     | -0.65 to -0.21      | Yes                 | ****              | <0.001           |    |       |     |
| 6.3                                                               |                           |                     |                     |                   |                  |    |       |     |
| Carr - CD200R-/- - CD200R MF vs. Carr - CD200R-/- - Vehicle (n=5) | 0.026                     | -0.20 to 0.25       | No                  | ns                | 0.998            |    |       |     |
| Carr - CD200R-/- - CD200R MF vs. Saline - CD200R-/- - Vehicle     | -0.41                     | -0.63 to -0.18      | Yes                 | ****              | <0.001           |    |       |     |
| Carr - CD200R-/- - CD200R MF vs. Carr - CD200R-/- - WT MF         | -0.29                     | -0.51 to -0.069     | Yes                 | ***               | 0.007            |    |       |     |
| Carr - CD200R-/- - CD200R MF vs. Saline - CD200R-/- - WT MF       | -0.39                     | -0.61 to -0.16      | Yes                 | ***               | <0.001           |    |       |     |
| Carr - CD200R-/- - CD200R MF vs. Saline - CD200R-/- - CD200R MF   | -0.35                     | -0.57 to -0.13      | Yes                 | ***               | <0.001           |    |       |     |
| 6.7                                                               |                           |                     |                     |                   |                  |    |       |     |
| Carr - CD200R-/- - CD200R MF vs. Carr - CD200R-/- - Vehicle (n=5) | -0.011                    | -0.24 to 0.22       | No                  | ns                | >0.999           |    |       |     |
| Carr - CD200R-/- - CD200R MF vs. Saline - CD200R-/- - Vehicle     | -0.51                     | -0.74 to -0.28      | Yes                 | ****              | <0.001           |    |       |     |
| Carr - CD200R-/- - CD200R MF vs. Carr - CD200R-/- - WT MF         | -0.33                     | -0.55 to -0.10      | Yes                 | ***               | 0.001            |    |       |     |
| Carr - CD200R-/- - CD200R MF vs. Saline - CD200R-/- - WT MF       | -0.45                     | -0.68 to -0.23      | Yes                 | ****              | <0.001           |    |       |     |
| Carr - CD200R-/- - CD200R MF vs. Saline - CD200R-/- - CD200R MF   | -0.49                     | -0.71 to -0.28      | Yes                 | ****              | <0.001           |    |       |     |
| Test details                                                      | Predicted (LS) mean 1     | Predicted (LS) mean | Predicted (LS) mean | SE of diff.       | N1               | N2 | q     | DF  |
| 0                                                                 |                           |                     |                     |                   |                  |    |       |     |
| Carr - CD200R-/- - CD200R MF vs. Carr - CD200R-/- - Vehicle (n=5) | 0.53                      | 0.47                | 0.064               | 0.089             | 6                | 5  | 0.72  | 208 |
| Carr - CD200R-/- - CD200R MF vs. Saline - CD200R-/- - Vehicle     | 0.53                      | 0.49                | 0.044               | 0.089             | 6                | 5  | 0.49  | 208 |
| Carr - CD200R-/- - CD200R MF vs. Carr - CD200R-/- - WT MF         | 0.53                      | 0.57                | -0.037              | 0.089             | 6                | 5  | 0.42  | 208 |
| Carr - CD200R-/- - CD200R MF vs. Saline - CD200R-/- - WT MF       | 0.53                      | 0.51                | 0.022               | 0.089             | 6                | 5  | 0.24  | 208 |
| Carr - CD200R-/- - CD200R MF vs. Saline - CD200R-/- - CD200R MF   | 0.53                      | 0.49                | 0.04                | 0.085             | 6                | 6  | 0.47  | 208 |
| 2                                                                 |                           |                     |                     |                   |                  |    |       |     |
| Carr - CD200R-/- - CD200R MF vs. Carr - CD200R-/- - Vehicle (n=5) | 0.028                     | 0.031               | -0.003              | 0.089             | 6                | 5  | 0.033 | 208 |
| Carr - CD200R-/- - CD200R MF vs. Saline - CD200R-/- - Vehicle     | 0.028                     | 0.52                | -0.49               | 0.089             | 6                | 5  | 5.5   | 208 |
| Carr - CD200R-/- - CD200R MF vs. Carr - CD200R-/- - WT MF         | 0.028                     | 0.031               | -0.003              | 0.089             | 6                | 5  | 0.034 | 208 |
| Carr - CD200R-/- - CD200R MF vs. Saline - CD200R-/- - WT MF       | 0.028                     | 0.5                 | -0.47               | 0.089             | 6                | 5  | 5.3   | 208 |
| Carr - CD200R-/- - CD200R MF vs. Saline - CD200R-/- - CD200R MF   | 0.028                     | 0.45                | -0.42               | 0.085             | 6                | 6  | 5     | 208 |
| 4                                                                 |                           |                     |                     |                   |                  |    |       |     |
| Carr - CD200R-/- - CD200R MF vs. Carr - CD200R-/- - Vehicle (n=5) | 0.047                     | 0.042               | 0.0056              | 0.089             | 6                | 5  | 0.062 | 208 |
| Carr - CD200R-/- - CD200R MF vs. Saline - CD200R-/- - Vehicle     | 0.047                     | 0.56                | -0.51               | 0.089             | 6                | 5  | 5.7   | 208 |
| Carr - CD200R-/- - CD200R MF vs. Carr - CD200R-/- - WT MF         | 0.047                     | 0.059               | -0.012              | 0.089             | 6                | 5  | 0.13  | 208 |
| Carr - CD200R-/- - CD200R MF vs. Saline - CD200R-/- - WT MF       | 0.047                     | 0.42                | -0.37               | 0.089             | 6                | 5  | 4.2   | 208 |
| Carr - CD200R-/- - CD200R MF vs. Saline - CD200R-/- - CD200R MF   | 0.047                     | 0.57                | -0.52               | 0.085             | 6                | 6  | 6.1   | 208 |
| 6                                                                 |                           |                     |                     |                   |                  |    |       |     |
| Carr - CD200R-/- - CD200R MF vs. Carr - CD200R-/- - Vehicle (n=5) | 0.04                      | 0.036               | 0.0041              | 0.089             | 6                | 5  | 0.046 | 208 |
| Carr - CD200R-/- - CD200R MF vs. Saline - CD200R-/- - Vehicle     | 0.04                      | 0.41                | -0.37               | 0.089             | 6                | 5  | 4.2   | 208 |
| Carr - CD200R-/- - CD200R MF vs. Carr - CD200R-/- - WT MF         | 0.04                      | 0.047               | -0.0073             | 0.089             | 6                | 5  | 0.082 | 208 |
| Carr - CD200R-/- - CD200R MF vs. Saline - CD200R-/- - WT MF       | 0.04                      | 0.52                | -0.48               | 0.089             | 6                | 5  | 5.4   | 208 |
| Carr - CD200R-/- - CD200R MF vs. Saline - CD200R-/- - CD200R MF   | 0.04                      | 0.46                | -0.42               | 0.085             | 6                | 6  | 4.9   | 208 |
| 6.05                                                              |                           |                     |                     |                   |                  |    |       |     |
| Carr - CD200R-/- - CD200R MF vs. Carr - CD200R-/- - Vehicle (n=5) | 0.059                     | 0.063               | -0.0043             | 0.089             | 6                | 5  | 0.048 | 208 |
| Carr - CD200R-/- - CD200R MF vs. Saline - CD200R-/- - Vehicle     | 0.059                     | 0.51                | -0.45               | 0.089             | 6                | 5  | 5     | 208 |
| Carr - CD200R-/- - CD200R MF vs. Carr - CD200R-/- - WT MF         | 0.059                     | 0.05                | 0.0092              | 0.089             | 6                | 5  | 0.1   | 208 |
| Carr - CD200R-/- - CD200R MF vs. Saline - CD200R-/- - WT MF       | 0.059                     | 0.55                | -0.49               | 0.089             | 6                | 5  | 5.5   | 208 |
| Carr - CD200R-/- - CD200R MF vs. Saline - CD200R-/- - CD200R MF   | 0.059                     | 0.51                | -0.45               | 0.085             | 6                | 6  | 5.3   | 208 |
| 6.15                                                              |                           |                     |                     |                   |                  |    |       |     |
| Carr - CD200R-/- - CD200R MF vs. Carr - CD200R-/- - Vehicle (n=5) | 0.064                     | 0.066               | -0.0023             | 0.089             | 6                | 5  | 0.026 | 208 |
| Carr - CD200R-/- - CD200R MF vs. Saline - CD200R-/- - Vehicle     | 0.064                     | 0.5                 | -0.44               | 0.089             | 6                | 5  | 4.9   | 208 |
| Carr - CD200R-/- - CD200R MF vs. Carr - CD200R-/- - WT MF         | 0.064                     | 0.099               | -0.036              | 0.089             | 6                | 5  | 0.4   | 208 |
| Carr - CD200R-/- - CD200R MF vs. Saline - CD200R-/- - WT MF       | 0.064                     | 0.61                | -0.54               | 0.089             | 6                | 5  | 6.1   | 208 |
| Carr - CD200R-/- - CD200R MF vs. Saline - CD200R-/- - CD200R MF   | 0.064                     | 0.49                | -0.43               | 0.085             | 6                | 6  | 5.1   | 208 |
| 6.3                                                               |                           |                     |                     |                   |                  |    |       |     |
| Carr - CD200R-/- - CD200R MF vs. Carr - CD200R-/- - Vehicle (n=5) | 0.088                     | 0.062               | 0.026               | 0.089             | 6                | 5  | 0.29  | 208 |
| Carr - CD200R-/- - CD200R MF vs. Saline - CD200R-/- - Vehicle     | 0.088                     | 0.5                 | -0.41               | 0.089             | 6                | 5  | 4.6   | 208 |
| Carr - CD200R-/- - CD200R MF vs. Carr - CD200R-/- - WT MF         | 0.088                     | 0.38                | -0.29               | 0.089             | 6                | 5  | 3.2   | 208 |
| Carr - CD200R-/- - CD200R MF vs. Saline - CD200R-/- - WT MF       | 0.088                     | 0.47                | -0.39               | 0.089             | 6                | 5  | 4.3   | 208 |
| Carr - CD200R-/- - CD200R MF vs. Saline - CD200R-/- - CD200R MF   | 0.088                     | 0.44                | -0.35               | 0.085             | 6                | 6  | 4.1   | 208 |
| 6.7                                                               |                           |                     |                     |                   |                  |    |       |     |
| Carr - CD200R-/- - CD200R MF vs. Carr - CD200R-/- - Vehicle (n=5) | 0.053                     | 0.064               | -0.011              | 0.089             | 6                | 5  | 0.12  | 208 |
| Carr - CD200R-/- - CD200R MF vs. Saline - CD200R-/- - Vehicle     | 0.053                     | 0.56                | -0.51               | 0.089             | 6                | 5  | 5.7   | 208 |
| Carr - CD200R-/- - CD200R MF vs. Carr - CD200R-/- - WT MF         | 0.053                     | 0.38                | -0.33               | 0.089             | 6                | 5  | 3.7   | 208 |
| Carr - CD200R-/- - CD200R MF vs. Saline - CD200R-/- - WT MF       | 0.053                     | 0.51                | -0.45               | 0.089             | 6                | 5  | 5.1   | 208 |
| Carr - CD200R-/- - CD200R MF vs. Saline - CD200R-/- - CD200R MF   | 0.053                     | 0.55                | -0.49               | 0.085             | 6                | 6  | 5.8   | 208 |

Fig 3C

ANOVA summary

|                                           |        |
|-------------------------------------------|--------|
| F                                         | 5.09   |
| P value                                   | 0.0206 |
| P value summary                           | *      |
| Significant diff. among means (P < 0.05)? | Yes    |
| R squared                                 | 0.4043 |

Brown-Forsythe test

|                                             |               |
|---------------------------------------------|---------------|
| F (DFn, DFd)                                | 5.491 (2, 15) |
| P value                                     | 0.0162        |
| P value summary                             | *             |
| Are SDs significantly different (P < 0.05)? | Yes           |

Bartlett's test

|                                             |        |
|---------------------------------------------|--------|
| Bartlett's statistic (corrected)            | 7.902  |
| P value                                     | 0.0192 |
| P value summary                             | *      |
| Are SDs significantly different (P < 0.05)? | Yes    |

ANOVA table

|                             |            |    |            |                   |          |
|-----------------------------|------------|----|------------|-------------------|----------|
|                             | SS         | DF | MS         | F (DFn, DFd)      | P value  |
| Treatment (between columns) | 2879756447 | 2  | 1439878223 | F (2, 15) = 5,090 | P=0,0206 |
| Residual (within columns)   | 4243449197 | 15 | 282896613  |                   |          |
| Total                       | 7123205644 | 17 |            |                   |          |

Data summary

|                                |    |
|--------------------------------|----|
| Number of treatments (columns) | 3  |
| Number of values (total)       | 18 |

Number of families

|                                  |      |
|----------------------------------|------|
| Number of families               | 1    |
| Number of comparisons per family | 2    |
| Alpha                            | 0.05 |

Holm-Sidak's multiple comparisons test

|                              |            |              |         |                  |     |                       |
|------------------------------|------------|--------------|---------|------------------|-----|-----------------------|
|                              | Mean Diff. | Significant? | Summary | Adjusted P Value | A-? |                       |
| WT vs. Cd200r <sup>-/-</sup> | 23322      | Yes          | *       | 0,0297           | B   | Cd200r <sup>-/-</sup> |
| WT vs. PBS                   | 29325      | Yes          | *       | 0,0172           | C   | PBS                   |

Test details

|                              |        |        |            |             |    |    |       |    |
|------------------------------|--------|--------|------------|-------------|----|----|-------|----|
|                              | Mean 1 | Mean 2 | Mean Diff. | SE of diff. | n1 | n2 | t     | DF |
| WT vs. Cd200r <sup>-/-</sup> | 76176  | 52854  | 23322      | 9711        | 6  | 6  | 2,402 | 15 |
| WT vs. PBS                   | 76176  | 46851  | 29325      | 9711        | 6  | 6  | 3,02  | 15 |

Fig 3D

| Two-way RM ANOVA                                              |                           | Matching: Stacked     |                           |                     |                  |    |         |    |
|---------------------------------------------------------------|---------------------------|-----------------------|---------------------------|---------------------|------------------|----|---------|----|
| Assume sphericity?                                            | Yes                       |                       |                           |                     |                  |    |         |    |
| Alpha                                                         | 0.05                      |                       |                           |                     |                  |    |         |    |
| Source of Variation                                           | % of total variation      | P value               | P value summary           | Significant?        |                  |    |         |    |
| Time x Treatment                                              | 11.36                     | <0.0001               | ****                      | Yes                 |                  |    |         |    |
| Time                                                          | 74.72                     | <0.0001               | ****                      | Yes                 |                  |    |         |    |
| Treatment                                                     | 3.943                     | <0.0001               | ****                      | Yes                 |                  |    |         |    |
| Subject                                                       | 0.6008                    | 0.9076                | ns                        | No                  |                  |    |         |    |
| ANOVA table                                                   | SS                        | DF                    | MS                        | F (DFn, DFd)        | P value          |    |         |    |
| Time x Treatment                                              | 0.2723                    | 14                    | 0.01968                   | F (14, 70) = 8.266  | P<0.0001         |    |         |    |
| Time                                                          | 1.83                      | 7                     | 0.2615                    | F (7, 70) = 82.41   | P<0.0001         |    |         |    |
| Treatment                                                     | 0.09658                   | 2                     | 0.04829                   | F (2, 10) = 32.81   | P<0.0001         |    |         |    |
| Subject                                                       | 0.01472                   | 10                    | 0.001472                  | F (10, 70) = 0.4639 | P=0.9076         |    |         |    |
| Residual                                                      | 0.2221                    | 70                    | 0.003173                  |                     |                  |    |         |    |
| Data summary                                                  |                           |                       |                           |                     |                  |    |         |    |
| Number of columns (Treatment)                                 | 3                         |                       |                           |                     |                  |    |         |    |
| Number of rows (Time)                                         | 8                         |                       |                           |                     |                  |    |         |    |
| Number of subjects (Subject)                                  | 13                        |                       |                           |                     |                  |    |         |    |
| Number of missing values                                      | 0                         |                       |                           |                     |                  |    |         |    |
| Within each row, compare columns (simple effects within rows) |                           |                       |                           |                     |                  |    |         |    |
| Number of families                                            | 8                         |                       |                           |                     |                  |    |         |    |
| Number of comparisons per family                              | 2                         |                       |                           |                     |                  |    |         |    |
| Alpha                                                         | 0.05                      |                       |                           |                     |                  |    |         |    |
| Dunnett's multiple comparisons test                           | Predicted (LS) mean diff. | 95.00% CI of diff.    | Significant?              | Summary             | Adjusted P Value |    |         |    |
| 0                                                             |                           |                       |                           |                     |                  |    |         |    |
| MMdtr + Carr + Vesicles WT vs. MMdtr + Carr + Vesicles KO     | 0.003695                  | -0.08281 to 0.09020   | No                        | ns                  | 0.9931           |    |         |    |
| MMdtr + Carr + Vesicles WT vs. MMdtr + Carr + Vesicle sup     | 0.01612                   | -0.06594 to 0.09818   | No                        | ns                  | 0.8664           |    |         |    |
| 2                                                             |                           |                       |                           |                     |                  |    |         |    |
| MMdtr + Carr + Vesicles WT vs. MMdtr + Carr + Vesicles KO     | 0.005812                  | -0.08069 to 0.09231   | No                        | ns                  | 0.9831           |    |         |    |
| MMdtr + Carr + Vesicles WT vs. MMdtr + Carr + Vesicle sup     | 0.00444                   | -0.07762 to 0.08850   | No                        | ns                  | 0.989            |    |         |    |
| 6                                                             |                           |                       |                           |                     |                  |    |         |    |
| MMdtr + Carr + Vesicles WT vs. MMdtr + Carr + Vesicles KO     | -0.00499                  | -0.09149 to 0.08151   | No                        | ns                  | 0.9875           |    |         |    |
| MMdtr + Carr + Vesicles WT vs. MMdtr + Carr + Vesicle sup     | -0.003092                 | -0.08515 to 0.07897   | No                        | ns                  | 0.9946           |    |         |    |
| 8                                                             |                           |                       |                           |                     |                  |    |         |    |
| MMdtr + Carr + Vesicles WT vs. MMdtr + Carr + Vesicles KO     | -0.00049                  | -0.08699 to 0.08601   | No                        | ns                  | 0.9999           |    |         |    |
| MMdtr + Carr + Vesicles WT vs. MMdtr + Carr + Vesicle sup     | -0.006372                 | -0.08843 to 0.07569   | No                        | ns                  | 0.9775           |    |         |    |
| 8.05                                                          |                           |                       |                           |                     |                  |    |         |    |
| MMdtr + Carr + Vesicles WT vs. MMdtr + Carr + Vesicles KO     | 0.04005                   | -0.04645 to 0.1266    | No                        | ns                  | 0.4749           |    |         |    |
| MMdtr + Carr + Vesicles WT vs. MMdtr + Carr + Vesicle sup     | 0.05799                   | -0.02407 to 0.1401    | No                        | ns                  | 0.1993           |    |         |    |
| 8.15                                                          |                           |                       |                           |                     |                  |    |         |    |
| MMdtr + Carr + Vesicles WT vs. MMdtr + Carr + Vesicles KO     | 0.1225                    | 0.03600 to 0.2090     | Yes                       | **                  | 0.004            |    |         |    |
| MMdtr + Carr + Vesicles WT vs. MMdtr + Carr + Vesicle sup     | 0.1305                    | 0.04844 to 0.2126     | Yes                       | **                  | 0.0012           |    |         |    |
| 8.4                                                           |                           |                       |                           |                     |                  |    |         |    |
| MMdtr + Carr + Vesicles WT vs. MMdtr + Carr + Vesicles KO     | 0.3288                    | 0.2423 to 0.4153      | Yes                       | ****                | <0.0001          |    |         |    |
| MMdtr + Carr + Vesicles WT vs. MMdtr + Carr + Vesicle sup     | 0.3477                    | 0.2656 to 0.4298      | Yes                       | ****                | <0.0001          |    |         |    |
| 9                                                             |                           |                       |                           |                     |                  |    |         |    |
| MMdtr + Carr + Vesicles WT vs. MMdtr + Carr + Vesicles KO     | 0.02                      | -0.06650 to 0.1065    | No                        | ns                  | 0.8209           |    |         |    |
| MMdtr + Carr + Vesicles WT vs. MMdtr + Carr + Vesicle sup     | -0.0095                   | -0.09156 to 0.07256   | No                        | ns                  | 0.9508           |    |         |    |
| Test details                                                  | Predicted (LS) mean 1     | Predicted (LS) mean 2 | Predicted (LS) mean diff. | SE of diff.         | N1               | N2 | q       | DF |
| 0                                                             |                           |                       |                           |                     |                  |    |         |    |
| MMdtr + Carr + Vesicles WT vs. MMdtr + Carr + Vesicles KO     | 0.468                     | 0.4643                | 0.003695                  | 0.03847             | 4                | 4  | 0.09605 | 80 |
| MMdtr + Carr + Vesicles WT vs. MMdtr + Carr + Vesicle sup     | 0.468                     | 0.4519                | 0.01612                   | 0.0365              | 4                | 5  | 0.4416  | 80 |
| 2                                                             |                           |                       |                           |                     |                  |    |         |    |
| MMdtr + Carr + Vesicles WT vs. MMdtr + Carr + Vesicles KO     | 0.04119                   | 0.03538               | 0.005812                  | 0.03847             | 4                | 4  | 0.1511  | 80 |
| MMdtr + Carr + Vesicles WT vs. MMdtr + Carr + Vesicle sup     | 0.04119                   | 0.03675               | 0.00444                   | 0.0365              | 4                | 5  | 0.1217  | 80 |
| 6                                                             |                           |                       |                           |                     |                  |    |         |    |
| MMdtr + Carr + Vesicles WT vs. MMdtr + Carr + Vesicles KO     | 0.04408                   | 0.04907               | -0.00499                  | 0.03847             | 4                | 4  | 0.1297  | 80 |
| MMdtr + Carr + Vesicles WT vs. MMdtr + Carr + Vesicle sup     | 0.04408                   | 0.04717               | -0.003092                 | 0.0365              | 4                | 5  | 0.08472 | 80 |
| 8                                                             |                           |                       |                           |                     |                  |    |         |    |
| MMdtr + Carr + Vesicles WT vs. MMdtr + Carr + Vesicles KO     | 0.04373                   | 0.04422               | -0.00049                  | 0.03847             | 4                | 4  | 0.01274 | 80 |
| MMdtr + Carr + Vesicles WT vs. MMdtr + Carr + Vesicle sup     | 0.04373                   | 0.0501                | -0.006372                 | 0.0365              | 4                | 5  | 0.1746  | 80 |
| 8.05                                                          |                           |                       |                           |                     |                  |    |         |    |
| MMdtr + Carr + Vesicles WT vs. MMdtr + Carr + Vesicles KO     | 0.09349                   | 0.05344               | 0.04005                   | 0.03847             | 4                | 4  | 1.041   | 80 |
| MMdtr + Carr + Vesicles WT vs. MMdtr + Carr + Vesicle sup     | 0.09349                   | 0.0355                | 0.05799                   | 0.0365              | 4                | 5  | 1.589   | 80 |
| 8.15                                                          |                           |                       |                           |                     |                  |    |         |    |
| MMdtr + Carr + Vesicles WT vs. MMdtr + Carr + Vesicles KO     | 0.1925                    | 0.07                  | 0.1225                    | 0.03847             | 4                | 4  | 3.184   | 80 |
| MMdtr + Carr + Vesicles WT vs. MMdtr + Carr + Vesicle sup     | 0.1925                    | 0.062                 | 0.1305                    | 0.0365              | 4                | 5  | 3.576   | 80 |
| 8.4                                                           |                           |                       |                           |                     |                  |    |         |    |
| MMdtr + Carr + Vesicles WT vs. MMdtr + Carr + Vesicles KO     | 0.3914                    | 0.06259               | 0.3288                    | 0.03847             | 4                | 4  | 8.547   | 80 |
| MMdtr + Carr + Vesicles WT vs. MMdtr + Carr + Vesicle sup     | 0.3914                    | 0.04369               | 0.3477                    | 0.0365              | 4                | 5  | 9.527   | 80 |
| 9                                                             |                           |                       |                           |                     |                  |    |         |    |
| MMdtr + Carr + Vesicles WT vs. MMdtr + Carr + Vesicles KO     | 0.0725                    | 0.0525                | 0.02                      | 0.03847             | 4                | 4  | 0.5199  | 80 |
| MMdtr + Carr + Vesicles WT vs. MMdtr + Carr + Vesicle sup     | 0.0725                    | 0.082                 | -0.0095                   | 0.0365              | 4                | 5  | 0.2603  | 80 |



Fig 4B

Two-way RM ANOVA Matching: Stacked  
 Assume sphericity? Yes  
 Alpha 0,05

| Source of Variation              | % of total variation | P value | P value summary | Significant? |
|----------------------------------|----------------------|---------|-----------------|--------------|
| Time x Column Factor (treatment) | 7,828                | <0,0001 | ****            | Yes          |
| Time                             | 4,315                | <0,0001 | ****            | Yes          |
| Column Factor                    | 9,13                 | <0,0001 | ****            | Yes          |
| Subject                          | 6,839                | 0,0849  | ns              | No           |

| ANOVA table          | SS     | DF  | MS      | F (DFn, DFd)        | P value  |
|----------------------|--------|-----|---------|---------------------|----------|
| Time x Column Factor | 0,6663 | 6   | 0,1111  | F (6, 114) = 5,582  | P<0,0001 |
| Time                 | 4,315  | 6   | 0,7192  | F (6, 114) = 36,15  | P<0,0001 |
| Column Factor        | 0,7772 | 1   | 0,7772  | F (1, 19) = 25,36   | P<0,0001 |
| Subject              | 0,5822 | 19  | 0,03064 | F (19, 114) = 1,540 | P=0,0849 |
| Residual             | 2,268  | 114 | 0,0199  |                     |          |

| Difference between column means |                   |
|---------------------------------|-------------------|
| Mean of WT Control Carr         | 0,3516            |
| Mean of WT iSec1 Carr           | 0,206             |
| Difference between means        | 0,1456            |
| SE of difference                | 0,02891           |
| 95% CI of difference            | 0,08508 to 0,2061 |

| Data summary                      |    |
|-----------------------------------|----|
| Number of columns (Column Factor) | 2  |
| Number of rows (Time)             | 7  |
| Number of subjects (Subject)      | 21 |
| Number of missing values          | 0  |

Compare each cell mean with the other cell mean in that row

|                                  |      |
|----------------------------------|------|
| Number of families               | 1    |
| Number of comparisons per family | 7    |
| Alpha                            | 0,05 |

| Sidak's multiple comparisons test | Predicted (LS) mean | 95,00% CI of diff. | Significant? | Summary | Adjusted P Value |
|-----------------------------------|---------------------|--------------------|--------------|---------|------------------|
| WT Control Carr - WT iSec1 Carr   |                     |                    |              |         |                  |
| 0                                 | 0,08209             | -0,09219 to 0,2564 | No           | ns      | 0,7932           |
| 1                                 | -0,0127             | -0,1870 to 0,1616  | No           | ns      | >-0,9999         |
| 2                                 | -0,005808           | -0,1801 to 0,1685  | No           | ns      | >-0,9999         |
| 3                                 | 0,08531             | -0,08898 to 0,2596 | No           | ns      | 0,7603           |
| 4                                 | 0,3233              | 0,1490 to 0,4975   | Yes          | ****    | <-0,0001         |
| 5                                 | 0,2131              | 0,03882 to 0,3874  | Yes          | **      | 0,0078           |
| 6                                 | 0,3338              | 0,1596 to 0,5081   | Yes          | ****    | <-0,0001         |

| Test details                    | Predicted (LS) mean | Predicted (LS) mean 2 | Predicted (LS) mean | SE of diff. | N1 | N2 | t      | DF  |
|---------------------------------|---------------------|-----------------------|---------------------|-------------|----|----|--------|-----|
| WT Control Carr - WT iSec1 Carr |                     |                       |                     |             |    |    |        |     |
| 0                               | 0,5601              | 0,478                 | 0,08209             | 0,06396     | 10 | 11 | 1,283  | 133 |
| 1                               | 0,03007             | 0,04277               | -0,0127             | 0,06396     | 10 | 11 | 0,1986 | 133 |
| 2                               | 0,0662              | 0,072                 | -0,005808           | 0,06396     | 10 | 11 | 0,0908 | 133 |
| 3                               | 0,2166              | 0,1313                | 0,08531             | 0,06396     | 10 | 11 | 1,334  | 133 |
| 4                               | 0,5296              | 0,2063                | 0,3233              | 0,06396     | 10 | 11 | 5,054  | 133 |
| 5                               | 0,4812              | 0,2681                | 0,2131              | 0,06396     | 10 | 11 | 3,332  | 133 |
| 6                               | 0,5775              | 0,2437                | 0,3338              | 0,06396     | 10 | 11 | 5,219  | 133 |

Fig 4C

Two-way RM ANOVA

Matching: Stacked

Assume sphericity?

Yes

Alpha

0,05

Source of Variation

| Source of Variation | % of total variation | P value | P value summary | Significant? |
|---------------------|----------------------|---------|-----------------|--------------|
| Time x Treatment    | 18,32                | <0,0001 | ****            | Yes          |
| Time                | 42,1                 | <0,0001 | ****            | Yes          |
| Treatment           | 25,45                | 0,0002  | ***             | Yes          |
| Subject             | 1,251                | 0,5885  | ns              | No           |

ANOVA table

|                  | SS      | DF | MS      | F (DFn, DFd)       | P value  |
|------------------|---------|----|---------|--------------------|----------|
| Time x Treatment | 0,616   | 8  | 0,077   | F (8, 40) = 6,900  | P<0,0001 |
| Time             | 1,415   | 8  | 0,1769  | F (8, 40) = 15,85  | P<0,0001 |
| Treatment        | 0,8556  | 1  | 0,8556  | F (1, 5) = 101,7   | P=0,0002 |
| Subject          | 0,04205 | 5  | 0,00841 | F (5, 40) = 0,7535 | P=0,5885 |
| Residual         | 0,4464  | 40 | 0,01116 |                    |          |

Difference between column means

|                              |                  |
|------------------------------|------------------|
| Mean of CD200ko Control Carr | 0,3456           |
| Mean of CD200ko iSec1 Carr   | 0,1101           |
| Difference between means     | 0,2355           |
| SE of difference             | 0,02335          |
| 95% CI of difference         | 0,1755 to 0,2955 |

Data summary

|                               |   |
|-------------------------------|---|
| Number of columns (Treatment) | 2 |
| Number of rows (Time)         | 9 |
| Number of subjects (Subject)  | 7 |
| Number of missing values      | 0 |

Compare each cell mean with the other cell mean in that row

Number of families

1

Number of comparisons per family

9

Alpha

0,05

Sidak's multiple comparisons test

Predicted (LS) mean 95,00% CI of diff, Significant? Summary Adjusted P Value

CD200ko Control Carr - CD200ko iSec1 Carr

|    |            |                   |     |      |         |
|----|------------|-------------------|-----|------|---------|
| 0  | -0,04375   | -0,2749 to 0,1874 | No  | ns   | 0,9996  |
| 1  | -0,0005687 | -0,2317 to 0,2306 | No  | ns   | >0,9999 |
| 2  | -0,003428  | -0,2346 to 0,2277 | No  | ns   | >0,9999 |
| 3  | 0,1211     | -0,1100 to 0,3522 | No  | ns   | 0,729   |
| 4  | 0,3791     | 0,1480 to 0,6102  | Yes | ***  | 0,0002  |
| 5  | 0,4311     | 0,2000 to 0,6622  | Yes | **** | <0,0001 |
| 6  | 0,3967     | 0,1656 to 0,6278  | Yes | **** | <0,0001 |
| 8  | 0,3822     | 0,1510 to 0,6133  | Yes | ***  | 0,0002  |
| 10 | 0,457      | 0,2259 to 0,6882  | Yes | **** | <0,0001 |

Test details

Predicted (LS) mean Predicted (LS) mean Predicted (LS) mean SE of diff, N1 N2 t DF

CD200ko Control Carr - CD200ko iSec1 Carr

|    |         |         |            |         |   |   |          |    |
|----|---------|---------|------------|---------|---|---|----------|----|
| 0  | 0,5268  | 0,5705  | -0,04375   | 0,07957 | 3 | 4 | 0,5498   | 45 |
| 1  | 0,03615 | 0,03672 | -0,0005687 | 0,07957 | 3 | 4 | 0,007148 | 45 |
| 2  | 0,02917 | 0,0326  | -0,003428  | 0,07957 | 3 | 4 | 0,04308  | 45 |
| 3  | 0,1562  | 0,03513 | 0,1211     | 0,07957 | 3 | 4 | 1,522    | 45 |
| 4  | 0,4328  | 0,05369 | 0,3791     | 0,07957 | 3 | 4 | 4,764    | 45 |
| 5  | 0,5087  | 0,07756 | 0,4311     | 0,07957 | 3 | 4 | 5,418    | 45 |
| 6  | 0,4657  | 0,06901 | 0,3967     | 0,07957 | 3 | 4 | 4,985    | 45 |
| 8  | 0,4328  | 0,05065 | 0,3822     | 0,07957 | 3 | 4 | 4,803    | 45 |
| 10 | 0,5223  | 0,06526 | 0,457      | 0,07957 | 3 | 4 | 5,744    | 45 |



Fig 4D

| Two-way RM ANOVA                                            |                      | Matching: Stacked   |                 |                    |                  |    |        |    |
|-------------------------------------------------------------|----------------------|---------------------|-----------------|--------------------|------------------|----|--------|----|
| Assume sphericity?                                          | Yes                  |                     |                 |                    |                  |    |        |    |
| Alpha                                                       | 0,05                 |                     |                 |                    |                  |    |        |    |
| Source of Variation                                         | % of total variation | P value             | P value summary | Significant?       |                  |    |        |    |
| Time x Treatment                                            | 13,5                 | 0,0007              | ***             | Yes                |                  |    |        |    |
| Time                                                        | 49,54                | <0,0001             | ****            | Yes                |                  |    |        |    |
| Treatment                                                   | 17,47                | <0,0001             | ****            | Yes                |                  |    |        |    |
| Subject                                                     | 0,3698               | 0,9872              | ns              | No                 |                  |    |        |    |
| ANOVA table                                                 | SS                   | DF                  | MS              | F (DFn, DFd)       | P value          |    |        |    |
| Time x Treatment                                            | 0,4387               | 8                   | 0,05484         | F (8, 48) = 4,238  | P=0,0007         |    |        |    |
| Time                                                        | 1,61                 | 8                   | 0,2012          | F (8, 48) = 15,55  | P<0,0001         |    |        |    |
| Treatment                                                   | 0,5678               | 1                   | 0,5678          | F (1, 8) = 283,5   | P<0,0001         |    |        |    |
| Subject                                                     | 0,01202              | 6                   | 0,002003        | F (6, 48) = 0,1548 | P=0,9872         |    |        |    |
| Residual                                                    | 0,6212               | 48                  | 0,01294         |                    |                  |    |        |    |
| Difference between column means                             |                      |                     |                 |                    |                  |    |        |    |
| Mean of CD200ko-iSecsi (EV)                                 | 0,1629               |                     |                 |                    |                  |    |        |    |
| Mean of CD200ko-iSecsi (iSec)                               | 0,3405               |                     |                 |                    |                  |    |        |    |
| Difference between means                                    | -0,1776              |                     |                 |                    |                  |    |        |    |
| SE of difference                                            | 0,01055              |                     |                 |                    |                  |    |        |    |
| 95% CI of difference                                        | -0,2034 to -0,1518   |                     |                 |                    |                  |    |        |    |
| Data summary                                                |                      |                     |                 |                    |                  |    |        |    |
| Number of columns (Treatment)                               | 2                    |                     |                 |                    |                  |    |        |    |
| Number of rows (Time)                                       | 9                    |                     |                 |                    |                  |    |        |    |
| Number of subjects (Subject)                                | 8                    |                     |                 |                    |                  |    |        |    |
| Number of missing values                                    | 0                    |                     |                 |                    |                  |    |        |    |
| Compare each cell mean with the other cell mean in that row |                      |                     |                 |                    |                  |    |        |    |
| Number of families                                          | 1                    |                     |                 |                    |                  |    |        |    |
| Number of comparisons per family                            | 9                    |                     |                 |                    |                  |    |        |    |
| Alpha                                                       | 0,05                 |                     |                 |                    |                  |    |        |    |
| Sidak's multiple comparisons test                           | Mean Diff,           | 95,00% CI of diff,  | Significant?    | Summary            | Adjusted P Value |    |        |    |
| CD200ko-iSecsi (EV) - CD200ko-iSecsi (iSec)                 |                      |                     |                 |                    |                  |    |        |    |
| -4                                                          | -0,03518             | -0,2557 to 0,1854   | No              | ns                 | >0,9999          |    |        |    |
| -3                                                          | -0,218               | -0,4386 to 0,002558 | No              | ns                 | 0,0547           |    |        |    |
| -1                                                          | -0,07506             | -0,2956 to 0,1455   | No              | ns                 | 0,9733           |    |        |    |
| 1                                                           | 0,01367              | -0,2069 to 0,2342   | No              | ns                 | >0,9999          |    |        |    |
| 2                                                           | -0,01636             | -0,2369 to 0,2042   | No              | ns                 | >0,9999          |    |        |    |
| 3                                                           | -0,1497              | -0,3702 to 0,07089  | No              | ns                 | 0,4036           |    |        |    |
| 4                                                           | -0,444               | -0,6645 to -0,2234  | Yes             | ****               | <0,0001          |    |        |    |
| 5                                                           | -0,3064              | -0,5270 to -0,08585 | Yes             | **                 | 0,0017           |    |        |    |
| 6                                                           | -0,3674              | -0,5880 to -0,1469  | Yes             | ***                | 0,0001           |    |        |    |
| Test details                                                | Mean 1               | Mean 2              | Mean Diff,      | SE of diff,        | N1               | N2 | t      | DF |
| CD200ko-iSecsi (EV) - CD200ko-iSecsi (iSec)                 |                      |                     |                 |                    |                  |    |        |    |
| -4                                                          | 0,4323               | 0,4675              | -0,03518        | 0,07657            | 4                | 4  | 0,4595 | 54 |
| -3                                                          | 0,2926               | 0,5106              | -0,218          | 0,07657            | 4                | 4  | 2,847  | 54 |
| -1                                                          | 0,3852               | 0,4603              | -0,07506        | 0,07657            | 4                | 4  | 0,9803 | 54 |
| 1                                                           | 0,04845              | 0,03478             | 0,01367         | 0,07657            | 4                | 4  | 0,1786 | 54 |
| 2                                                           | 0,03142              | 0,04778             | -0,01636        | 0,07657            | 4                | 4  | 0,2137 | 54 |
| 3                                                           | 0,03749              | 0,1872              | -0,1497         | 0,07657            | 4                | 4  | 1,955  | 54 |
| 4                                                           | 0,06973              | 0,5137              | -0,444          | 0,07657            | 4                | 4  | 5,798  | 54 |
| 5                                                           | 0,0941               | 0,4005              | -0,3064         | 0,07657            | 4                | 4  | 4,002  | 54 |
| 6                                                           | 0,07509              | 0,4425              | -0,3674         | 0,07657            | 4                | 4  | 4,799  | 54 |

Sup. Fig1B

Two-way RM ANOVA      Matching: Stacked  
 Assume sphericity?      Yes  
 Alpha                      0,05

| Source of Variation | % of total variation | P value | P value summary | Significant? |
|---------------------|----------------------|---------|-----------------|--------------|
| Time x Treatment    | 32                   | <0,001  | ****            | Yes          |
| Time                | 31                   | <0,001  | ****            | Yes          |
| Treatment           | 21                   | 0,003   | **              | Yes          |
| Subject             | 2,1                  | 0,325   | ns              | No           |

| ANOVA table      | SS  | DF | MS  | F (DFn, DFd)    | P value |
|------------------|-----|----|-----|-----------------|---------|
| Time x Treatment | 96  | 8  | 12  | F (8, 32) = 9,4 | P<0,001 |
| Time             | 93  | 8  | 12  | F (8, 32) = 9,1 | P<0,001 |
| Treatment        | 62  | 1  | 62  | F (1, 4) = 40   | P=0,003 |
| Subject          | 6,2 | 4  | 1,6 | F (4, 32) = 1,2 | P=0,325 |
| Residual         | 41  | 32 | 1,3 |                 |         |

| Difference between column means |              |
|---------------------------------|--------------|
| Mean of Carrageenan             | 6,3          |
| Mean of Saline                  | 8,4          |
| Difference between means        | -2,1         |
| SE of difference                | 0,34         |
| 95% CI of difference            | -3,1 to -1,2 |

| Data summary                  |   |
|-------------------------------|---|
| Number of columns (Treatment) | 2 |
| Number of rows (Time)         | 9 |
| Number of subjects (Subject)  | 6 |
| Number of missing values      | 0 |

Compare each cell mean with the other cell mean in that row

Number of families                      1  
 Number of comparisons per family      9  
 Alpha                                      0,05

| Sidak's multiple comparisons test | Mean Diff, | 95,00% CI of diff, Significant? | Summary | Adjusted P Value |
|-----------------------------------|------------|---------------------------------|---------|------------------|
| Carrageenan - Saline              |            |                                 |         |                  |
| 0                                 | 0,36       | -2,4 to 3,1                     | No      | ns               |
| 0,5                               | -4,9       | -7,6 to -2,1                    | Yes     | ****             |
| 1                                 | -6,2       | -8,9 to -3,4                    | Yes     | ****             |
| 2                                 | -6         | -8,8 to -3,3                    | Yes     | ****             |
| 3                                 | -2         | -4,7 to 0,76                    | No      | ns               |
| 4                                 | -0,87      | -3,6 to 1,9                     | No      | ns               |
| 5                                 | 0,84       | -1,9 to 3,6                     | No      | ns               |
| 6                                 | -0,95      | -3,7 to 1,8                     | No      | ns               |
| 8                                 | 0,46       | -2,3 to 3,2                     | No      | ns               |

| Test details         | Mean 1 | Mean 2 | Mean Diff, | SE of diff, | N1 | N2 | t    | DF |
|----------------------|--------|--------|------------|-------------|----|----|------|----|
| Carrageenan - Saline |        |        |            |             |    |    |      |    |
| 0                    | 8,5    | 8,1    | 0,36       | 0,94        | 3  | 3  | 0,38 | 36 |
| 0,5                  | 2,8    | 7,7    | -4,9       | 0,94        | 3  | 3  | 5,2  | 36 |
| 1                    | 3,1    | 9,3    | -6,2       | 0,94        | 3  | 3  | 6,6  | 36 |
| 2                    | 3      | 9      | -6         | 0,94        | 3  | 3  | 6,5  | 36 |
| 3                    | 5,4    | 7,4    | -2         | 0,94        | 3  | 3  | 2,1  | 36 |
| 4                    | 7,2    | 8,1    | -0,87      | 0,94        | 3  | 3  | 0,93 | 36 |
| 5                    | 9,2    | 8,4    | 0,84       | 0,94        | 3  | 3  | 0,9  | 36 |
| 6                    | 8,7    | 9,7    | -0,95      | 0,94        | 3  | 3  | 1    | 36 |
| 8                    | 8,4    | 8      | 0,46       | 0,94        | 3  | 3  | 0,49 | 36 |

## Sup. Fig1E

|                                            |                   |
|--------------------------------------------|-------------------|
| Table Analyzed                             | F4/80             |
| Column B                                   | Cntr              |
| vs.                                        | vs,               |
| Column A                                   | no pain           |
| Unpaired t test                            |                   |
| P value                                    | 0,6505            |
| P value summary                            | ns                |
| Significantly different (P < 0.05)?        | No                |
| One- or two-tailed P value?                | Two-tailed        |
| t, df                                      | t=0,4767, df=6    |
| How big is the difference?                 |                   |
| Mean of column A                           | 431,4             |
| Mean of column B                           | 490,7             |
| Difference between means (B - A) $\pm$ SEM | 59,27 $\pm$ 124,4 |
| 95% confidence interval                    | -245,0 to 363,6   |
| R squared (eta squared)                    | 0,03649           |
| F test to compare variances                |                   |
| F, DFn, Dfd                                | 3,612, 3, 3       |
| P value                                    | 0,3196            |
| P value summary                            | ns                |
| Significantly different (P < 0.05)?        | No                |
| Data analyzed                              |                   |
| Sample size, column A                      | 4                 |
| Sample size, column B                      | 4                 |

Sup. Fig2B

ANOVA summary

|                                           |         |
|-------------------------------------------|---------|
| F                                         | 57,45   |
| P value                                   | <0,0001 |
| P value summary                           | ****    |
| Significant diff. among means (P < 0.05)? | Yes     |
| R squared                                 | 0,9054  |

Brown-Forsythe test

|                                             |               |
|---------------------------------------------|---------------|
| F (DFn, DFd)                                | 1,593 (4, 24) |
| P value                                     | 0,2085        |
| P value summary                             | ns            |
| Are SDs significantly different (P < 0.05)? | No            |

Bartlett's test

|                                             |        |
|---------------------------------------------|--------|
| Bartlett's statistic (corrected)            | 15,84  |
| P value                                     | 0,0032 |
| P value summary                             | **     |
| Are SDs significantly different (P < 0.05)? | Yes    |

ANOVA table

|                             | SS    | DF | MS     | F (DFn, DFd)      | P value  |
|-----------------------------|-------|----|--------|-------------------|----------|
| Treatment (between columns) | 75,23 | 4  | 18,81  | F (4, 24) = 57,45 | P<0,0001 |
| Residual (within columns)   | 7,856 | 24 | 0,3273 |                   |          |
| Total                       | 83,08 | 28 |        |                   |          |

Data summary

|                                |    |
|--------------------------------|----|
| Number of treatments (columns) | 5  |
| Number of values (total)       | 29 |

Number of families

|                                  |      |
|----------------------------------|------|
| Number of families               | 1    |
| Number of comparisons per family | 4    |
| Alpha                            | 0,05 |

Dunnett's multiple comparisons test

|               | Mean Diff, | 95,00% CI of diff, | Significant? | Summary | Adjusted P Value | A-?  |
|---------------|------------|--------------------|--------------|---------|------------------|------|
| Saline vs. 1  | 3,287      | 2,442 to 4,132     | Yes          | ****    | <0,0001          | B 1  |
| Saline vs. 3  | 3,407      | 2,562 to 4,252     | Yes          | ****    | <0,0001          | C 3  |
| Saline vs. 7  | 3,287      | 2,442 to 4,132     | Yes          | ****    | <0,0001          | D 7  |
| Saline vs. 10 | 3,847      | 3,002 to 4,692     | Yes          | ****    | <0,0001          | E 10 |

Test details

|               | Mean 1 | Mean 2 | Mean Diff, | SE of diff, | n1 | n2 | q     | DF |
|---------------|--------|--------|------------|-------------|----|----|-------|----|
| Saline vs. 1  | 4,367  | 1,08   | 3,287      | 0,3191      | 9  | 5  | 10,3  | 24 |
| Saline vs. 3  | 4,367  | 0,96   | 3,407      | 0,3191      | 9  | 5  | 10,68 | 24 |
| Saline vs. 7  | 4,367  | 1,08   | 3,287      | 0,3191      | 9  | 5  | 10,3  | 24 |
| Saline vs. 10 | 4,367  | 0,52   | 3,847      | 0,3191      | 9  | 5  | 12,05 | 24 |

## Sup. Fig2C

|                                            |                    |
|--------------------------------------------|--------------------|
| Column B                                   | DT                 |
| vs.                                        | vs.                |
| Column A                                   | Saline             |
| Unpaired t test                            |                    |
| P value                                    | 0,3373             |
| P value summary                            | ns                 |
| Significantly different (P < 0.05)?        | No                 |
| One- or two-tailed P value?                | Two-tailed         |
| t, df                                      | t=0,9769, df=27    |
| How big is the difference?                 |                    |
| Mean of column A                           | 64,41              |
| Mean of column B                           | 58,79              |
| Difference between means (B - A) $\pm$ SEM | -5,626 $\pm$ 5,759 |
| 95% confidence interval                    | -17,44 to 6,190    |
| R squared (eta squared)                    | 0,03414            |
| F test to compare variances                |                    |
| F, DFn, Dfd                                | 2,979, 8, 19       |
| P value                                    | 0,0484             |
| P value summary                            | *                  |
| Significantly different (P < 0.05)?        | Yes                |
| Data analyzed                              |                    |
| Sample size, column A                      | 9                  |
| Sample size, column B                      | 20                 |

## Sup. Fig2D

|                                        |                  |
|----------------------------------------|------------------|
| Column B                               | DT               |
| vs.                                    | vs,              |
| Column A                               | Saline           |
| Unpaired t test                        |                  |
| P value                                | 0,0005           |
| P value summary                        | ***              |
| Significantly different (P < 0.05)?    | Yes              |
| One- or two-tailed P value?            | Two-tailed       |
| t, df                                  | t=4,832, df=11   |
| How big is the difference?             |                  |
| Mean of column A                       | 54,9             |
| Mean of column B                       | 30,33            |
| Difference between means (B - A) ± SEM | -24,57 ± 5,084   |
| 95% confidence interval                | -35,76 to -13,38 |
| R squared (eta squared)                | 0,6797           |
| F test to compare variances            |                  |
| F, DFn, Dfd                            | 2,402, 6, 5      |
| P value                                | 0,3546           |
| P value summary                        | ns               |
| Significantly different (P < 0.05)?    | No               |
| Data analyzed                          |                  |
| Sample size, column A                  | 7                |
| Sample size, column B                  | 6                |

## Sup. Fig2E

|                                        |                   |
|----------------------------------------|-------------------|
| Column B                               | WT                |
| vs.                                    | vs,               |
| Column A                               | MM <sup>dtr</sup> |
| Unpaired t test                        |                   |
| P value                                | 0,0973            |
| P value summary                        | ns                |
| Significantly different (P < 0.05)?    | No                |
| One- or two-tailed P value?            | Two-tailed        |
| t, df                                  | t=2,156, df=4     |
| How big is the difference?             |                   |
| Mean of column A                       | 4,546             |
| Mean of column B                       | 5,945             |
| Difference between means (B - A) ± SEM | 1,399 ± 0,6489    |
| 95% confidence interval                | -0,4024 to 3,201  |
| R squared (eta squared)                | 0,5376            |
| F test to compare variances            |                   |
| F, DFn, Dfd                            | 6,409, 2, 2       |
| P value                                | 0,2699            |
| P value summary                        | ns                |
| Significantly different (P < 0.05)?    | No                |
| Data analyzed                          |                   |
| Sample size, column A                  | 3                 |
| Sample size, column B                  | 3                 |

## Sup. Fig2H

|                                        |                   |
|----------------------------------------|-------------------|
| Column B                               | WT                |
| vs.                                    | vs,               |
| Column A                               | MM <sup>dtr</sup> |
| Unpaired t test                        |                   |
| P value                                | 0,0973            |
| P value summary                        | ns                |
| Significantly different (P < 0.05)?    | No                |
| One- or two-tailed P value?            | Two-tailed        |
| t, df                                  | t=2,156, df=4     |
| How big is the difference?             |                   |
| Mean of column A                       | 4,546             |
| Mean of column B                       | 5,945             |
| Difference between means (B - A) ± SEM | 1,399 ± 0,6489    |
| 95% confidence interval                | -0,4024 to 3,201  |
| R squared (eta squared)                | 0,5376            |
| F test to compare variances            |                   |
| F, DFn, Dfd                            | 6,409, 2, 2       |
| P value                                | 0,2699            |
| P value summary                        | ns                |
| Significantly different (P < 0.05)?    | No                |
| Data analyzed                          |                   |
| Sample size, column A                  | 3                 |
| Sample size, column B                  | 3                 |



## Sup. Fig2I

|                                        |                   |
|----------------------------------------|-------------------|
| Column B                               | WT                |
| vs.                                    | vs,               |
| Column A                               | MM <sup>dtr</sup> |
| Unpaired t test                        |                   |
| P value                                | 0,8443            |
| P value summary                        | ns                |
| Significantly different (P < 0.05)?    | No                |
| One- or two-tailed P value?            | Two-tailed        |
| t, df                                  | t=0,2095, df=4    |
| How big is the difference?             |                   |
| Mean of column A                       | 42043             |
| Mean of column B                       | 39647             |
| Difference between means (B - A) ± SEM | -2395 ± 11435     |
| 95% confidence interval                | -34143 to 29353   |
| R squared (eta squared)                | 0,01085           |
| F test to compare variances            |                   |
| F, DFn, Dfd                            | 1,809, 2, 2       |
| P value                                | 0,712             |
| P value summary                        | ns                |
| Significantly different (P < 0.05)?    | No                |
| Data analyzed                          |                   |
| Sample size, column A                  | 3                 |
| Sample size, column B                  | 3                 |

Sup. Fig3A

Two-way RM ANOVA Matching: Stacked  
 Assume sphericity? Yes  
 Alpha 0,05

| Source of Variation | % of total variation | P value | P value summary | Significant? |
|---------------------|----------------------|---------|-----------------|--------------|
| Time x Treatment    | 17                   | <0,001  | ****            | Yes          |
| Time                | 61                   | <0,001  | ****            | Yes          |
| Treatment           | 14                   | <0,001  | ****            | Yes          |
| Subject             | 2,1                  | 0,004   | **              | Yes          |

  

| ANOVA table      | SS  | DF | MS   | F (DFn, DFd)     | P value |
|------------------|-----|----|------|------------------|---------|
| Time x Treatment | 117 | 7  | 17   | F (7, 84) = 38   | P<0,001 |
| Time             | 410 | 7  | 59   | F (7, 84) = 133  | P<0,001 |
| Treatment        | 96  | 1  | 96   | F (1, 12) = 80   | P<0,001 |
| Subject          | 14  | 12 | 1,2  | F (12, 84) = 2,7 | P=0,004 |
| Residual         | 37  | 84 | 0,44 |                  |         |

Difference between column means  
 Mean of Depleted Carrageenan 4  
 Mean of Non-depleted Carrageenan 5,8  
 Difference between means -1,9  
 SE of difference 0,21  
 95% CI of difference -2,3 to -1,4

Data summary  
 Number of columns (Treatment) 2  
 Number of rows (Time) 8  
 Number of subjects (Subject) 14  
 Number of missing values 0

Compare each cell mean with the other cell mean in that row

Number of families 1  
 Number of comparisons per family 8  
 Alpha 0,05

| Sidak's multiple comparisons test               | Mean Diff, | 95.00% CI of diff, | Significant? | Summary | Adjusted P Value |
|-------------------------------------------------|------------|--------------------|--------------|---------|------------------|
| Depleted Carrageenan - Non-depleted Carrageenan |            |                    |              |         |                  |
| 0                                               | 0,15       | -0,94 to 1,2       | No           | ns      | >0,999           |
| 0.5                                             | -0,021     | -1,1 to 1,1        | No           | ns      | >0,999           |
| 1                                               | -0,042     | -1,1 to 1,0        | No           | ns      | >0,999           |
| 2                                               | -0,14      | -1,2 to 0,95       | No           | ns      | >0,999           |
| 3                                               | -1,8       | -2,8 to -0,67      | Yes          | ***     | <0,001           |
| 4                                               | -3,5       | -4,6 to -2,4       | Yes          | ****    | <0,001           |
| 5                                               | -4,9       | -6,0 to -3,8       | Yes          | ****    | <0,001           |
| 6                                               | -4,6       | -5,7 to -3,5       | Yes          | ****    | <0,001           |

| Test details                                    | Mean 1 | Mean 2 | Mean Diff, | SE of diff, | N1 | N2 | t     | DF |
|-------------------------------------------------|--------|--------|------------|-------------|----|----|-------|----|
| Depleted Carrageenan - Non-depleted Carrageenan |        |        |            |             |    |    |       |    |
| 0                                               | 8,6    | 8,4    | 0,15       | 0,39        | 7  | 7  | 0,39  | 96 |
| 0.5                                             | 2,8    | 2,8    | -0,021     | 0,39        | 7  | 7  | 0,054 | 96 |
| 1                                               | 2,9    | 3      | -0,042     | 0,39        | 7  | 7  | 0,11  | 96 |
| 2                                               | 2,9    | 3      | -0,14      | 0,39        | 7  | 7  | 0,36  | 96 |
| 3                                               | 3,3    | 5      | -1,8       | 0,39        | 7  | 7  | 4,5   | 96 |
| 4                                               | 3,6    | 7,1    | -3,5       | 0,39        | 7  | 7  | 8,9   | 96 |
| 5                                               | 3,8    | 8,7    | -4,9       | 0,39        | 7  | 7  | 13    | 96 |
| 6                                               | 4      | 8,7    | -4,6       | 0,39        | 7  | 7  | 12    | 96 |

Sup. Fig3B

Two-way RM ANOVA Matching: Stacked  
 Assume sphericity? Yes  
 Alpha 0,05

| Source of Variation | % of total variation | P value | P value summary | Significant? |
|---------------------|----------------------|---------|-----------------|--------------|
| Time x Treatment    | 8,5                  | 0,008   | **              | Yes          |
| Time                | 13                   | <0,001  | ***             | Yes          |
| Treatment           | 2,5                  | 0,171   | ns              | No           |
| Subject             | 28                   | 0,026   | *               | Yes          |

| ANOVA table      | SS   | DF | MS  | F (DFn, DFd)     | P value |
|------------------|------|----|-----|------------------|---------|
| Time x Treatment | 330  | 3  | 110 | F (3, 66) = 4,2  | P=0,008 |
| Time             | 491  | 3  | 164 | F (3, 66) = 6,3  | P<0,001 |
| Treatment        | 98   | 1  | 98  | F (1, 22) = 2,0  | P=0,171 |
| Subject          | 1072 | 22 | 49  | F (22, 66) = 1,9 | P=0,026 |
| Residual         | 1709 | 66 | 26  |                  |         |

Difference between column means  
 Mean of Depleted Carrageenan 36  
 Mean of Non-depleted Carrageenan 38  
 Difference between means -2,2  
 SE of difference 1,6  
 95% CI of difference -5,5 to 1,0

Data summary  
 Number of columns (Treatment) 2  
 Number of rows (Time) 4  
 Number of subjects (Subject) 24  
 Number of missing values 0

Within each column, compare rows (simple effects within columns)

Number of families 2  
 Number of comparisons per family 3  
 Alpha 0,05

| Dunnett's multiple comparisons test | Predicted (LS) mean diff. | 95,00% CI of diff. | Significant? | Summary | Adjusted P Value |
|-------------------------------------|---------------------------|--------------------|--------------|---------|------------------|
| <b>Depleted Carrageenan</b>         |                           |                    |              |         |                  |
| 0 vs. 2                             | 4,9                       | 0,71 to 9,1        | Yes          | *       | 0,018            |
| 0 vs. 4                             | 8,5                       | 4,3 to 13          | Yes          | ****    | <0,001           |
| 0 vs. 6                             | 7,2                       | 3,0 to 11          | Yes          | ***     | <0,001           |
| <b>Non-depleted Carrageenan</b>     |                           |                    |              |         |                  |
| 0 vs. 2                             | 8,2                       | 1,7 to 15          | Yes          | *       | 0,01             |
| 0 vs. 4                             | 2,5                       | -4,1 to 9,0        | No           | ns      | 0,692            |
| 0 vs. 6                             | 0,89                      | -5,7 to 7,4        | No           | ns      | 0,977            |

| Test details                    | Predicted (LS) mean 1 | Predicted (LS) mean 2 | Predicted (LS) mean diff. | SE of diff. | N1 | N2 | q    | DF |
|---------------------------------|-----------------------|-----------------------|---------------------------|-------------|----|----|------|----|
| <b>Depleted Carrageenan</b>     |                       |                       |                           |             |    |    |      |    |
| 0 vs. 2                         | 41                    | 36                    | 4,9                       | 1,7         | 17 | 17 | 2,8  | 66 |
| 0 vs. 4                         | 41                    | 33                    | 8,5                       | 1,7         | 17 | 17 | 4,9  | 66 |
| 0 vs. 6                         | 41                    | 34                    | 7,2                       | 1,7         | 17 | 17 | 4,1  | 66 |
| <b>Non-depleted Carrageenan</b> |                       |                       |                           |             |    |    |      |    |
| 0 vs. 2                         | 41                    | 33                    | 8,2                       | 2,7         | 7  | 7  | 3    | 66 |
| 0 vs. 4                         | 41                    | 39                    | 2,5                       | 2,7         | 7  | 7  | 0,91 | 66 |
| 0 vs. 6                         | 41                    | 40                    | 0,89                      | 2,7         | 7  | 7  | 0,33 | 66 |

| Sup. Fit3C                                                          |                           | Matching: Stacked     |                           |                   |                  |    |       |    |
|---------------------------------------------------------------------|---------------------------|-----------------------|---------------------------|-------------------|------------------|----|-------|----|
| Two-way RM ANOVA                                                    |                           | Yes                   |                           |                   |                  |    |       |    |
| Assume sphericity?                                                  |                           | Yes                   |                           |                   |                  |    |       |    |
| Alpha                                                               |                           | 0.05                  |                           |                   |                  |    |       |    |
| Source of Variation                                                 | % of total variation      | P value               | P value summary           | Significant?      |                  |    |       |    |
| Time x Treatment                                                    | 18                        | <0.001                | ****                      | Yes               |                  |    |       |    |
| Time                                                                | 53                        | <0.001                | ****                      | Yes               |                  |    |       |    |
| Treatment                                                           | 12                        | <0.001                | ****                      | Yes               |                  |    |       |    |
| Subject                                                             | 1.1                       | 0.878                 | ns                        | No                |                  |    |       |    |
| ANOVA table                                                         |                           |                       |                           |                   |                  |    |       |    |
| Time x Treatment                                                    | 18                        | 21                    | 1.2                       | F (DFn, DFd)      | P value          |    |       |    |
| Time                                                                | 3.5                       | 7                     | 0.51                      | F (21, 70) = 4.0  | P<0.001          |    |       |    |
| Treatment                                                           | 0.77                      | 3                     | 0.26                      | F (7, 70) = 36    | P<0.001          |    |       |    |
| Subject                                                             | 0.071                     | 10                    | 0.0071                    | F (3, 10) = 36    | P<0.001          |    |       |    |
| Residual                                                            | 0.97                      | 70                    | 0.014                     | F (10, 70) = 0.51 | P=0.878          |    |       |    |
| Data summary                                                        |                           |                       |                           |                   |                  |    |       |    |
| Number of columns (Treatment)                                       | 4                         |                       |                           |                   |                  |    |       |    |
| Number of rows (Time)                                               | 8                         |                       |                           |                   |                  |    |       |    |
| Number of subjects (Subject)                                        | 14                        |                       |                           |                   |                  |    |       |    |
| Number of missing values                                            | 0                         |                       |                           |                   |                  |    |       |    |
| Within each row, compare columns (simple effects within rows)       |                           |                       |                           |                   |                  |    |       |    |
| Number of families                                                  | 1                         |                       |                           |                   |                  |    |       |    |
| Number of comparisons per family                                    | 48                        |                       |                           |                   |                  |    |       |    |
| Alpha                                                               | 0.05                      |                       |                           |                   |                  |    |       |    |
| Tukey's multiple comparisons test                                   |                           |                       |                           |                   |                  |    |       |    |
|                                                                     | Predicted (LS) mean diff. | 95.00% CI of diff.    | Significant?              | Summary           | Adjusted P Value |    |       |    |
| 0                                                                   |                           |                       |                           |                   |                  |    |       |    |
| Depleted Carrageenan Females vs. Depleted Carrageenan Males         | 0.044                     | -0.30 to 0.39         | No                        | ns                | >0.999           |    |       |    |
| Depleted Carrageenan Females vs. Non-depleted Carrageenan Females   | 0.1                       | -0.27 to 0.47         | No                        | ns                | >0.999           |    |       |    |
| Depleted Carrageenan Females vs. Non-depleted Carrageenan Males     | -0.06                     | -0.40 to 0.28         | No                        | ns                | >0.999           |    |       |    |
| Depleted Carrageenan Males vs. Non-depleted Carrageenan Females     | 0.056                     | -0.29 to 0.40         | No                        | ns                | >0.999           |    |       |    |
| Depleted Carrageenan Males vs. Non-depleted Carrageenan Males       | -0.1                      | -0.42 to 0.21         | No                        | ns                | >0.999           |    |       |    |
| Non-depleted Carrageenan Females vs. Non-depleted Carrageenan Males | -0.16                     | -0.50 to 0.18         | No                        | ns                | 0.993            |    |       |    |
| 0.5                                                                 |                           |                       |                           |                   |                  |    |       |    |
| Depleted Carrageenan Females vs. Depleted Carrageenan Males         | 0.035                     | -0.31 to 0.38         | No                        | ns                | >0.999           |    |       |    |
| Depleted Carrageenan Females vs. Non-depleted Carrageenan Females   | -0.0045                   | -0.37 to 0.36         | No                        | ns                | >0.999           |    |       |    |
| Depleted Carrageenan Females vs. Non-depleted Carrageenan Males     | 0.032                     | -0.31 to 0.37         | No                        | ns                | >0.999           |    |       |    |
| Depleted Carrageenan Males vs. Non-depleted Carrageenan Females     | -0.04                     | -0.38 to 0.30         | No                        | ns                | >0.999           |    |       |    |
| Depleted Carrageenan Males vs. Non-depleted Carrageenan Males       | -0.0033                   | -0.32 to 0.31         | No                        | ns                | >0.999           |    |       |    |
| Non-depleted Carrageenan Females vs. Non-depleted Carrageenan Males | 0.036                     | -0.31 to 0.38         | No                        | ns                | >0.999           |    |       |    |
| 1                                                                   |                           |                       |                           |                   |                  |    |       |    |
| Depleted Carrageenan Females vs. Depleted Carrageenan Males         | 0.038                     | -0.30 to 0.38         | No                        | ns                | >0.999           |    |       |    |
| Depleted Carrageenan Females vs. Non-depleted Carrageenan Females   | -0.015                    | -0.38 to 0.35         | No                        | ns                | >0.999           |    |       |    |
| Depleted Carrageenan Females vs. Non-depleted Carrageenan Males     | 0.024                     | -0.32 to 0.37         | No                        | ns                | >0.999           |    |       |    |
| Depleted Carrageenan Males vs. Non-depleted Carrageenan Females     | -0.053                    | -0.40 to 0.29         | No                        | ns                | >0.999           |    |       |    |
| Depleted Carrageenan Males vs. Non-depleted Carrageenan Males       | -0.014                    | -0.33 to 0.30         | No                        | ns                | >0.999           |    |       |    |
| Non-depleted Carrageenan Females vs. Non-depleted Carrageenan Males | 0.039                     | -0.30 to 0.38         | No                        | ns                | >0.999           |    |       |    |
| 2                                                                   |                           |                       |                           |                   |                  |    |       |    |
| Depleted Carrageenan Females vs. Depleted Carrageenan Males         | -0.018                    | -0.36 to 0.32         | No                        | ns                | >0.999           |    |       |    |
| Depleted Carrageenan Females vs. Non-depleted Carrageenan Females   | 0.0074                    | -0.37 to 0.36         | No                        | ns                | >0.999           |    |       |    |
| Depleted Carrageenan Females vs. Non-depleted Carrageenan Males     | 0.0033                    | -0.34 to 0.35         | No                        | ns                | >0.999           |    |       |    |
| Depleted Carrageenan Males vs. Non-depleted Carrageenan Females     | 0.011                     | -0.33 to 0.35         | No                        | ns                | >0.999           |    |       |    |
| Depleted Carrageenan Males vs. Non-depleted Carrageenan Males       | 0.021                     | -0.35 to 0.34         | No                        | ns                | >0.999           |    |       |    |
| Non-depleted Carrageenan Females vs. Non-depleted Carrageenan Males | 0.011                     | -0.33 to 0.35         | No                        | ns                | >0.999           |    |       |    |
| 3                                                                   |                           |                       |                           |                   |                  |    |       |    |
| Depleted Carrageenan Females vs. Depleted Carrageenan Males         | 0.068                     | -0.27 to 0.41         | No                        | ns                | >0.999           |    |       |    |
| Depleted Carrageenan Females vs. Non-depleted Carrageenan Females   | -0.0039                   | -0.37 to 0.36         | No                        | ns                | >0.999           |    |       |    |
| Depleted Carrageenan Females vs. Non-depleted Carrageenan Males     | -0.048                    | -0.39 to 0.29         | No                        | ns                | >0.999           |    |       |    |
| Depleted Carrageenan Males vs. Non-depleted Carrageenan Females     | -0.072                    | -0.41 to 0.27         | No                        | ns                | >0.999           |    |       |    |
| Depleted Carrageenan Males vs. Non-depleted Carrageenan Males       | -0.12                     | -0.43 to 0.20         | No                        | ns                | >0.999           |    |       |    |
| Non-depleted Carrageenan Females vs. Non-depleted Carrageenan Males | -0.045                    | -0.39 to 0.30         | No                        | ns                | >0.999           |    |       |    |
| 4                                                                   |                           |                       |                           |                   |                  |    |       |    |
| Depleted Carrageenan Females vs. Depleted Carrageenan Males         | 0.094                     | -0.25 to 0.44         | No                        | ns                | >0.999           |    |       |    |
| Depleted Carrageenan Females vs. Non-depleted Carrageenan Females   | -0.38                     | -0.74 to -0.012       | Yes                       | *                 | 0.034            |    |       |    |
| Depleted Carrageenan Females vs. Non-depleted Carrageenan Males     | -0.23                     | -0.57 to 0.12         | No                        | ns                | 0.731            |    |       |    |
| Depleted Carrageenan Males vs. Non-depleted Carrageenan Females     | -0.47                     | -0.81 to -0.13        | Yes                       | ***               | <0.001           |    |       |    |
| Depleted Carrageenan Males vs. Non-depleted Carrageenan Males       | -0.32                     | -0.64 to -0.0034      | Yes                       | **                | 0.044            |    |       |    |
| Non-depleted Carrageenan Females vs. Non-depleted Carrageenan Males | 0.15                      | -0.19 to 0.49         | No                        | ns                | 0.997            |    |       |    |
| 5                                                                   |                           |                       |                           |                   |                  |    |       |    |
| Depleted Carrageenan Females vs. Depleted Carrageenan Males         | 0.071                     | -0.27 to 0.41         | No                        | ns                | >0.999           |    |       |    |
| Depleted Carrageenan Females vs. Non-depleted Carrageenan Females   | -0.31                     | -0.68 to 0.056        | No                        | ns                | 0.232            |    |       |    |
| Depleted Carrageenan Females vs. Non-depleted Carrageenan Males     | -0.43                     | -0.78 to -0.092       | Yes                       | **                | 0.001            |    |       |    |
| Depleted Carrageenan Males vs. Non-depleted Carrageenan Females     | -0.38                     | -0.72 to -0.039       | Yes                       | **                | 0.013            |    |       |    |
| Depleted Carrageenan Males vs. Non-depleted Carrageenan Males       | -0.5                      | -0.82 to -0.19        | Yes                       | ***               | <0.001           |    |       |    |
| Non-depleted Carrageenan Females vs. Non-depleted Carrageenan Males | -0.12                     | -0.47 to 0.22         | No                        | ns                | >0.999           |    |       |    |
| 6                                                                   |                           |                       |                           |                   |                  |    |       |    |
| Depleted Carrageenan Females vs. Depleted Carrageenan Males         | 0.0012                    | -0.34 to 0.34         | No                        | ns                | >0.999           |    |       |    |
| Depleted Carrageenan Females vs. Non-depleted Carrageenan Females   | -0.52                     | -0.89 to -0.15        | Yes                       | ***               | <0.001           |    |       |    |
| Depleted Carrageenan Females vs. Non-depleted Carrageenan Males     | -0.38                     | -0.72 to -0.040       | Yes                       | *                 | 0.012            |    |       |    |
| Depleted Carrageenan Males vs. Non-depleted Carrageenan Females     | -0.52                     | -0.86 to -0.18        | Yes                       | ****              | <0.001           |    |       |    |
| Depleted Carrageenan Males vs. Non-depleted Carrageenan Males       | -0.38                     | -0.71 to 0.067        | Yes                       | **                | 0.003            |    |       |    |
| Non-depleted Carrageenan Females vs. Non-depleted Carrageenan Males | 0.14                      | -0.20 to 0.48         | No                        | ns                | >0.999           |    |       |    |
| Test details                                                        |                           |                       |                           |                   |                  |    |       |    |
|                                                                     | Predicted (LS) mean 1     | Predicted (LS) mean 2 | Predicted (LS) mean diff. | SE of diff.       | N1               | N2 | q     | DF |
| 0                                                                   |                           |                       |                           |                   |                  |    |       |    |
| Depleted Carrageenan Females vs. Depleted Carrageenan Males         | 0.63                      | 0.59                  | 0.044                     | 0.087             | 3                | 4  | 0.71  | 80 |
| Depleted Carrageenan Females vs. Non-depleted Carrageenan Females   | 0.63                      | 0.53                  | 0.1                       | 0.093             | 3                | 3  | 1.5   | 80 |
| Depleted Carrageenan Females vs. Non-depleted Carrageenan Males     | 0.63                      | 0.69                  | -0.06                     | 0.087             | 3                | 4  | 0.97  | 80 |
| Depleted Carrageenan Males vs. Non-depleted Carrageenan Females     | 0.59                      | 0.53                  | 0.066                     | 0.087             | 4                | 3  | 0.91  | 80 |
| Depleted Carrageenan Males vs. Non-depleted Carrageenan Males       | 0.59                      | 0.69                  | -0.1                      | 0.087             | 4                | 4  | 1.8   | 80 |
| Non-depleted Carrageenan Females vs. Non-depleted Carrageenan Males | 0.53                      | 0.69                  | -0.16                     | 0.087             | 3                | 4  | 2.6   | 80 |
| 0.5                                                                 |                           |                       |                           |                   |                  |    |       |    |
| Depleted Carrageenan Females vs. Depleted Carrageenan Males         | 0.067                     | 0.032                 | 0.035                     | 0.087             | 3                | 4  | 0.57  | 80 |
| Depleted Carrageenan Females vs. Non-depleted Carrageenan Females   | 0.067                     | 0.071                 | -0.0045                   | 0.093             | 3                | 3  | 0.089 | 80 |
| Depleted Carrageenan Females vs. Non-depleted Carrageenan Males     | 0.067                     | 0.035                 | 0.032                     | 0.087             | 3                | 4  | 0.51  | 80 |
| Depleted Carrageenan Males vs. Non-depleted Carrageenan Females     | 0.032                     | 0.071                 | -0.04                     | 0.087             | 4                | 3  | 0.64  | 80 |
| Depleted Carrageenan Males vs. Non-depleted Carrageenan Males       | 0.032                     | 0.035                 | -0.0033                   | 0.081             | 4                | 4  | 0.057 | 80 |
| Non-depleted Carrageenan Females vs. Non-depleted Carrageenan Males | 0.071                     | 0.035                 | 0.036                     | 0.087             | 3                | 4  | 0.59  | 80 |
| 1                                                                   |                           |                       |                           |                   |                  |    |       |    |
| Depleted Carrageenan Females vs. Depleted Carrageenan Males         | 0.076                     | 0.038                 | 0.038                     | 0.087             | 3                | 4  | 0.61  | 80 |
| Depleted Carrageenan Females vs. Non-depleted Carrageenan Females   | 0.076                     | 0.091                 | -0.015                    | 0.093             | 3                | 3  | 0.23  | 80 |
| Depleted Carrageenan Females vs. Non-depleted Carrageenan Males     | 0.076                     | 0.052                 | 0.024                     | 0.087             | 3                | 4  | 0.38  | 80 |
| Depleted Carrageenan Males vs. Non-depleted Carrageenan Females     | 0.038                     | 0.091                 | -0.053                    | 0.087             | 4                | 3  | 0.86  | 80 |
| Depleted Carrageenan Males vs. Non-depleted Carrageenan Males       | 0.038                     | 0.052                 | -0.014                    | 0.081             | 4                | 4  | 0.25  | 80 |
| Non-depleted Carrageenan Females vs. Non-depleted Carrageenan Males | 0.091                     | 0.052                 | 0.039                     | 0.087             | 3                | 4  | 0.63  | 80 |
| 2                                                                   |                           |                       |                           |                   |                  |    |       |    |
| Depleted Carrageenan Females vs. Depleted Carrageenan Males         | 0.067                     | 0.085                 | -0.018                    | 0.087             | 3                | 4  | 0.29  | 80 |
| Depleted Carrageenan Females vs. Non-depleted Carrageenan Females   | 0.067                     | 0.074                 | -0.0074                   | 0.093             | 3                | 3  | 0.11  | 80 |
| Depleted Carrageenan Females vs. Non-depleted Carrageenan Males     | 0.067                     | 0.064                 | 0.0033                    | 0.087             | 3                | 4  | 0.053 | 80 |
| Depleted Carrageenan Males vs. Non-depleted Carrageenan Females     | 0.085                     | 0.074                 | 0.011                     | 0.087             | 4                | 3  | 0.17  | 80 |
| Depleted Carrageenan Males vs. Non-depleted Carrageenan Males       | 0.085                     | 0.064                 | 0.021                     | 0.081             | 4                | 4  | 0.37  | 80 |
| Non-depleted Carrageenan Females vs. Non-depleted Carrageenan Males | 0.074                     | 0.064                 | 0.011                     | 0.087             | 3                | 4  | 0.17  | 80 |
| 3                                                                   |                           |                       |                           |                   |                  |    |       |    |
| Depleted Carrageenan Females vs. Depleted Carrageenan Males         | 0.13                      | 0.086                 | 0.048                     | 0.087             | 3                | 4  | 1.1   | 80 |
| Depleted Carrageenan Females vs. Non-depleted Carrageenan Females   | 0.13                      | 0.14                  | -0.0039                   | 0.093             | 3                | 3  | 0.059 | 80 |
| Depleted Carrageenan Females vs. Non-depleted Carrageenan Males     | 0.13                      | 0.18                  | -0.048                    | 0.087             | 3                | 4  | 0.78  | 80 |
| Depleted Carrageenan Males vs. Non-depleted Carrageenan Females     | 0.066                     | 0.14                  | -0.072                    | 0.087             | 4                | 3  | 1.2   | 80 |
| Depleted Carrageenan Males vs. Non-depleted Carrageenan Males       | 0.066                     | 0.18                  | -0.12                     | 0.081             | 4                | 4  | 2     | 80 |
| Non-depleted Carrageenan Females vs. Non-depleted Carrageenan Males | 0.14                      | 0.18                  | -0.045                    | 0.087             | 3                | 4  | 0.72  | 80 |
| 4                                                                   |                           |                       |                           |                   |                  |    |       |    |
| Depleted Carrageenan Females vs. Depleted Carrageenan Males         | 0.15                      | 0.053                 | 0.094                     | 0.087             | 3                | 4  | 1.5   | 80 |
| Depleted Carrageenan Females vs. Non-depleted Carrageenan Females   | 0.15                      | 0.52                  | -0.38                     | 0.093             | 3                | 3  | 5.7   | 80 |
| Depleted Carrageenan Females vs. Non-depleted Carrageenan Males     | 0.15                      | 0.37                  | -0.23                     | 0.087             | 3                | 4  | 3.7   | 80 |
| Depleted Carrageenan Males vs. Non-depleted Carrageenan Females     | 0.053                     | 0.52                  | -0.47                     | 0.087             | 4                | 3  | 7.8   | 80 |
| Depleted Carrageenan Males vs. Non-depleted Carrageenan Males       | 0.053                     | 0.37                  | -0.32                     | 0.081             | 4                | 4  | 5.6   | 80 |
| Non-depleted Carrageenan Females vs. Non-depleted Carrageenan Males | 0.52                      | 0.37                  | 0.15                      | 0.087             | 3                | 4  | 2.5   | 80 |
| 5                                                                   |                           |                       |                           |                   |                  |    |       |    |
| Depleted Carrageenan Females vs. Depleted Carrageenan Males         | 0.13                      | 0.061                 | 0.071                     | 0.087             | 3                | 4  | 1.1   | 80 |
| Depleted Carrageenan Females vs. Non-depleted Carrageenan Females   | 0.13                      | 0.44                  | -0.31                     | 0.093             | 3                | 3  | 4.7   | 80 |
| Depleted Carrageenan Females vs. Non-depleted Carrageenan Males     | 0.13                      | 0.57                  | -0.43                     | 0.087             | 3                | 4  | 7     | 80 |
| Depleted Carrageenan Males vs. Non-depleted Carrageenan Females     | 0.061                     | 0.44                  | -0.38                     | 0.087             | 4                | 3  | 6.2   | 80 |
| Depleted Carrageenan Males vs. Non-depleted Carrageenan Males       | 0.061                     | 0.57                  | -0.5                      | 0.081             | 4                | 4  | 8.8   | 80 |
| Non-depleted Carrageenan Females vs. Non-depleted Carrageenan Males | 0.44                      | 0.57                  | -0.12                     | 0.087             | 3                | 4  | 2     | 80 |
| 6                                                                   |                           |                       |                           |                   |                  |    |       |    |
| Depleted Carrageenan Females vs. Depleted Carrageenan Males         | 0.1                       | 0.1                   | 0.0012                    | 0.087             | 3                | 4  | 0.02  | 80 |
| Depleted Carrageenan Females vs. Non-depleted Carrageenan Females   | 0.1                       | 0.62                  | -0.62                     | 0.087             | 3                | 3  | 7.9   | 80 |
| Depleted Carrageenan Females vs. Non-depleted Carrageenan Males     | 0.1                       | 0.49                  | -0.38                     | 0.087             | 3                | 4  | 6.2   | 80 |
| Depleted Carrageenan Males vs. Non-depleted Carrageenan Females     | 0.1                       | 0.62                  | -0.52                     | 0.087             | 4                | 3  | 8.5   | 80 |
| Depleted Carrageenan Males vs. Non-depleted Carrageenan Males       | 0.1                       | 0.49                  | -0.38                     | 0.081             | 4                | 4  | 8.7   | 80 |
| Non-depleted Carrageenan Females vs. Non-depleted Carrageenan Males | 0.62                      | 0.49                  | 0.14                      | 0.087             | 3                | 4  | 2.2   | 80 |

Sup. Fig3D

Two-way RM ANOVA      Matching: Stacked  
 Assume sphericity?      Yes  
 Alpha                      0,05

| Source of Variation | % of total variation | P value | P value summary | Significant? |
|---------------------|----------------------|---------|-----------------|--------------|
| Time x Treatment    | 16                   | <0,001  | ****            | Yes          |
| Time                | 64                   | <0,001  | ****            | Yes          |
| Treatment           | 7,8                  | <0,001  | ***             | Yes          |
| Subject             | 2,1                  | 0,096   | ns              | No           |

| ANOVA table      | SS   | DF | MS     | F (DFn, DFd)     | P value |
|------------------|------|----|--------|------------------|---------|
| Time x Treatment | 0,84 | 8  | 0,11   | F (8, 80) = 16   | P<0,001 |
| Time             | 3,5  | 8  | 0,43   | F (8, 80) = 64   | P<0,001 |
| Treatment        | 0,42 | 1  | 0,42   | F (1, 10) = 37   | P<0,001 |
| Subject          | 0,11 | 10 | 0,011  | F (10, 80) = 1,7 | P=0,096 |
| Residual         | 0,54 | 80 | 0,0068 |                  |         |

Difference between column means  
 Mean of WT CFA                      0,22  
 Mean of MMdtr CFA                0,096  
 Difference between means        0,12  
 SE of difference                      0,021  
 95% CI of difference                0,079 to 0,17

Data summary  
 Number of columns (Treatment)    2  
 Number of rows (Time)            9  
 Number of subjects (Subject)    12  
 Number of missing values        0

Compare each cell mean with the other cell mean in that row

Number of families                    1  
 Number of comparisons per family   9  
 Alpha                                    0,05

| Sidak's multiple comparisons test | Mean Diff, | 95,00% CI of diff, | Significant? | Summary | Adjusted P Value |
|-----------------------------------|------------|--------------------|--------------|---------|------------------|
| WT CFA - MMdtr CFA                |            |                    |              |         |                  |
| 0                                 | 0,066      | -0,073 to 0,21     | No           | ns      | 0,834            |
| 1                                 | -0,0013    | -0,14 to 0,14      | No           | ns      | >0,999           |
| 2                                 | -0,0026    | -0,14 to 0,14      | No           | ns      | >0,999           |
| 3                                 | -0,01      | -0,15 to 0,13      | No           | ns      | >0,999           |
| 4                                 | -0,00093   | -0,14 to 0,14      | No           | ns      | >0,999           |
| 6                                 | 0,053      | -0,086 to 0,19     | No           | ns      | 0,95             |
| 8                                 | 0,13       | -0,0099 to 0,27    | No           | ns      | 0,086            |
| 10                                | 0,43       | 0,29 to 0,57       | Yes          | ****    | <0,001           |
| 12                                | 0,47       | 0,33 to 0,60       | Yes          | ****    | <0,001           |

| Test details       | Mean 1 | Mean 2 | Mean Diff, | SE of diff, | N1 | N2 | t     | DF |
|--------------------|--------|--------|------------|-------------|----|----|-------|----|
| WT CFA - MMdtr CFA |        |        |            |             |    |    |       |    |
| 0                  | 0,61   | 0,55   | 0,066      | 0,049       | 6  | 6  | 1,3   | 90 |
| 1                  | 0,021  | 0,023  | -0,0013    | 0,049       | 6  | 6  | 0,027 | 90 |
| 2                  | 0,021  | 0,024  | -0,0026    | 0,049       | 6  | 6  | 0,053 | 90 |
| 3                  | 0,026  | 0,036  | -0,01      | 0,049       | 6  | 6  | 0,21  | 90 |
| 4                  | 0,031  | 0,031  | -0,00093   | 0,049       | 6  | 6  | 0,019 | 90 |
| 6                  | 0,092  | 0,038  | 0,053      | 0,049       | 6  | 6  | 1,1   | 90 |
| 8                  | 0,18   | 0,046  | 0,13       | 0,049       | 6  | 6  | 2,6   | 90 |
| 10                 | 0,49   | 0,069  | 0,43       | 0,049       | 6  | 6  | 8,6   | 90 |
| 12                 | 0,52   | 0,051  | 0,47       | 0,049       | 6  | 6  | 9,4   | 90 |

Sup. Fig3E

Two-way RM ANOVA      Matching: Stacked  
 Assume sphericity?      Yes  
 Alpha      0,05

| Source of Variation | % of total variation | P value | P value summary | Significant? |
|---------------------|----------------------|---------|-----------------|--------------|
| Time x Treatment    | 15                   | <0,001  | ****            | Yes          |
| Time                | 60                   | <0,001  | ***             | Yes          |
| Treatment           | 8,4                  | <0,001  | *               | Yes          |
| Subject             | 3,7                  | 0,014   | *               | Yes          |

| ANOVA table      | SS  | DF | MS   | F (DFn, DFd)     | P value |
|------------------|-----|----|------|------------------|---------|
| Time x Treatment | 72  | 8  | 9    | F (8, 80) = 12   | P<0,001 |
| Time             | 283 | 8  | 35   | F (8, 80) = 49   | P<0,001 |
| Treatment        | 39  | 1  | 39   | F (1, 10) = 22   | P<0,001 |
| Subject          | 18  | 10 | 1,8  | F (10, 80) = 2,4 | P=0,014 |
| Residual         | 58  | 80 | 0,72 |                  |         |

Difference between column means  
 Mean of WT CFA      4,8  
 Mean of MMdtr CFA      3,6  
 Difference between means      1,2  
 SE of difference      0,25  
 95% CI of difference      0,64 to 1,8

Data summary  
 Number of columns (Treatment)      2  
 Number of rows (Time)      9  
 Number of subjects (Subject)      12  
 Number of missing values      0

Compare each cell mean with the other cell mean in that row

Number of families      1  
 Number of comparisons per family      9  
 Alpha      0,05

| Sidak's multiple comparisons test | Mean Diff. | 95,00% CI of diff. | Significant? | Summary | Adjusted P Value |
|-----------------------------------|------------|--------------------|--------------|---------|------------------|
| WT CFA - MMdtr CFA                |            |                    |              |         |                  |
| 0                                 | 0,22       | -1,3 to 1,7        | No           | ns      | >0,999           |
| 1                                 | -0,47      | -2,0 to 1,0        | No           | ns      | 0,985            |
| 2                                 | -0,16      | -1,7 to 1,3        | No           | ns      | >0,999           |
| 3                                 | -0,3       | -1,8 to 1,2        | No           | ns      | >0,999           |
| 4                                 | 0,39       | -1,1 to 1,9        | No           | ns      | 0,996            |
| 6                                 | 1,3        | -0,24 to 2,8       | No           | ns      | 0,16             |
| 8                                 | 2,3        | 0,77 to 3,8        | Yes          | ***     | <0,001           |
| 10                                | 3,3        | 1,8 to 4,8         | Yes          | ****    | <0,001           |
| 12                                | 4,4        | 2,9 to 5,9         | Yes          | ****    | <0,001           |

| Test details       | Mean 1 | Mean 2 | Mean Diff. | SE of diff. | N1 | N2 | t    | DF |
|--------------------|--------|--------|------------|-------------|----|----|------|----|
| WT CFA - MMdtr CFA |        |        |            |             |    |    |      |    |
| 0                  | 7,3    | 7,1    | 0,22       | 0,53        | 6  | 6  | 0,42 | 90 |
| 1                  | 1,8    | 2,2    | -0,47      | 0,53        | 6  | 6  | 0,89 | 90 |
| 2                  | 2,4    | 2,6    | -0,16      | 0,53        | 6  | 6  | 0,31 | 90 |
| 3                  | 2,6    | 2,9    | -0,3       | 0,53        | 6  | 6  | 0,57 | 90 |
| 4                  | 3,6    | 3,2    | 0,39       | 0,53        | 6  | 6  | 0,75 | 90 |
| 6                  | 5      | 3,7    | 1,3        | 0,53        | 6  | 6  | 2,4  | 90 |
| 8                  | 5,8    | 3,5    | 2,3        | 0,53        | 6  | 6  | 4,3  | 90 |
| 10                 | 7,4    | 4,1    | 3,3        | 0,53        | 6  | 6  | 6,2  | 90 |
| 12                 | 7,7    | 3,3    | 4,4        | 0,53        | 6  | 6  | 8,2  | 90 |

## Sup. Fig4B

|                                            |                   |
|--------------------------------------------|-------------------|
| Column B                                   | Monocytes         |
| vs.                                        | vs,               |
| Column A                                   | Saline            |
| Unpaired t test                            |                   |
| P value                                    | 0,0196            |
| P value summary                            | *                 |
| Significantly different (P < 0.05)?        | Yes               |
| One- or two-tailed P value?                | Two-tailed        |
| t, df                                      | t=3,773, df=4     |
| How big is the difference?                 |                   |
| Mean of column A                           | 9,133             |
| Mean of column B                           | 51,73             |
| Difference between means (B - A) $\pm$ SEM | 42,60 $\pm$ 11,29 |
| 95% confidence interval                    | 11,25 to 73,95    |
| R squared (eta squared)                    | 0,7806            |
| F test to compare variances                |                   |
| F, DFn, Dfd                                | 29,74, 2, 2       |
| P value                                    | 0,0651            |
| P value summary                            | ns                |
| Significantly different (P < 0.05)?        | No                |
| Data analyzed                              |                   |
| Sample size, column A                      | 3                 |
| Sample size, column B                      | 3                 |

Sup. Fig4C

Two-way RM ANOVA Matching: Stacked  
 Assume sphericity? Yes  
 Alpha 0,05

| Source of Variation | % of total variation | P value | P value summary | Significant? |
|---------------------|----------------------|---------|-----------------|--------------|
| Time x Treatment    | 14                   | <0,001  | ****            | Yes          |
| Time                | 52                   | <0,001  | ****            | Yes          |
| Treatment           | 14                   | <0,001  | ****            | Yes          |
| Subject             | 1,7                  | 0,449   | ns              | No           |

| ANOVA table      | SS  | DF | MS   | F (DFn, DFd)    | P value |
|------------------|-----|----|------|-----------------|---------|
| Time x Treatment | 59  | 7  | 8,5  | F (7, 56) = 9,3 | P<0,001 |
| Time             | 218 | 7  | 31   | F (7, 56) = 34  | P<0,001 |
| Treatment        | 59  | 1  | 59   | F (1, 8) = 65   | P<0,001 |
| Subject          | 7,3 | 8  | 0,91 | F (8, 56) = 1,0 | P=0,449 |
| Residual         | 51  | 56 | 0,91 |                 |         |

Difference between column means

|                          |              |
|--------------------------|--------------|
| Mean of depl-veh         | 4            |
| Mean of depl-MN          | 5,8          |
| Difference between means | -1,7         |
| SE of difference         | 0,22         |
| 95% CI of difference     | -2,3 to -1,2 |

Data summary

|                               |    |
|-------------------------------|----|
| Number of columns (Treatment) | 2  |
| Number of rows (Time)         | 8  |
| Number of subjects (Subject)  | 10 |
| Number of missing values      | 0  |

Compare each cell mean with the other cell mean in that row

|                                  |      |
|----------------------------------|------|
| Number of families               | 1    |
| Number of comparisons per family | 8    |
| Alpha                            | 0,05 |

| Sidak's multiple comparisons test | Predicted (LS) mear | 95,00% CI of diff. | Significant? | Summary | Adjusted P Value |
|-----------------------------------|---------------------|--------------------|--------------|---------|------------------|
| depl-veh - depl-MN                |                     |                    |              |         |                  |
| 0                                 | -0,049              | -1,8 to 1,7        | No           | ns      | >0,999           |
| 2                                 | -0,15               | -1,9 to 1,6        | No           | ns      | >0,999           |
| 3                                 | -0,35               | -2,1 to 1,4        | No           | ns      | 0,999            |
| 6                                 | 0,25                | -1,5 to 2,0        | No           | ns      | >0,999           |
| 6,05                              | -2,2                | -4,0 to -0,48      | Yes          | **      | 0,005            |
| 6,15                              | -3,5                | -5,3 to -1,8       | Yes          | ****    | <0,001           |
| 6,7                               | -4                  | -5,7 to -2,3       | Yes          | ****    | <0,001           |
| 7                                 | -3,9                | -5,7 to -2,2       | Yes          | ****    | <0,001           |

| Test details       | Predicted (LS) mear | Predicted (LS) mear | Predicted (LS) mear | SE of diff. | N1 | N2 | t     | DF |
|--------------------|---------------------|---------------------|---------------------|-------------|----|----|-------|----|
| depl-veh - depl-MN |                     |                     |                     |             |    |    |       |    |
| 0                  | 8,4                 | 8,5                 | -0,049              | 0,62        | 4  | 6  | 0,079 | 64 |
| 2                  | 3,1                 | 3,2                 | -0,15               | 0,62        | 4  | 6  | 0,25  | 64 |
| 3                  | 2,7                 | 3                   | -0,35               | 0,62        | 4  | 6  | 0,57  | 64 |
| 6                  | 3,7                 | 3,4                 | 0,25                | 0,62        | 4  | 6  | 0,41  | 64 |
| 6,05               | 3,5                 | 5,7                 | -2,2                | 0,62        | 4  | 6  | 3,6   | 64 |
| 6,15               | 3,7                 | 7,2                 | -3,5                | 0,62        | 4  | 6  | 5,7   | 64 |
| 6,7                | 3,3                 | 7,3                 | -4                  | 0,62        | 4  | 6  | 6,5   | 64 |
| 7                  | 3,7                 | 7,7                 | -3,9                | 0,62        | 4  | 6  | 6,4   | 64 |



Sup: Fig4D

|                                 |                      |         |                 |                  |         |
|---------------------------------|----------------------|---------|-----------------|------------------|---------|
| Two-way RM ANOVA                | Matching: Stacked    |         |                 |                  |         |
| Assume sphericity?              | Yes                  |         |                 |                  |         |
| Alpha                           | 0,05                 |         |                 |                  |         |
| Source of Variation             | % of total variation | P value | P value summary | Significant?     |         |
| Time x Treatment                | 19                   | <0,001  | ---             | Yes              |         |
| Time                            | 36                   | <0,001  | ----            | Yes              |         |
| Treatment                       | 12                   | 0,002   | --              | Yes              |         |
| Subject                         | 0,97                 | 0,676   | ns              | No               |         |
| ANOVA table                     | SS                   | DF      | MS              | F (DFn, DFd)     | P value |
| Time x Treatment                | 0,67                 | 10      | 0,067           | F (10, 40) = 4,5 | P<0,001 |
| Time                            | 1,3                  | 10      | 0,13            | F (10, 40) = 8,6 | P<0,001 |
| Treatment                       | 0,44                 | 1       | 0,44            | F (1, 4) = 51    | P=0,002 |
| Subject                         | 0,035                | 4       | 0,0087          | F (4, 40) = 0,58 | P=0,676 |
| Residual                        | 0,59                 | 40      | 0,015           |                  |         |
| Difference between column means |                      |         |                 |                  |         |
| Mean of Depleted ipsi PBS       | 0,11                 |         |                 |                  |         |
| Mean of Depleted ipsi Monocytes | 0,29                 |         |                 |                  |         |
| Difference between means        | -0,17                |         |                 |                  |         |
| SE of difference                | 0,024                |         |                 |                  |         |
| 95% CI of difference            | -0,24 to -0,11       |         |                 |                  |         |
| Data summary                    |                      |         |                 |                  |         |
| Number of columns (Treatment)   | 2                    |         |                 |                  |         |
| Number of rows (Time)           | 11                   |         |                 |                  |         |
| Number of subjects (Subject)    | 6                    |         |                 |                  |         |
| Number of missing values        | 0                    |         |                 |                  |         |

Compare each cell mean with the other cell mean in that row

|                                  |      |
|----------------------------------|------|
| Number of families               | 1    |
| Number of comparisons per family | 11   |
| Alpha                            | 0,05 |

| Sidak's multiple comparisons test           | Predicted (LS) mean diff. | 95,00% CI of diff. | Significant? | Summary | Adjusted P Value |
|---------------------------------------------|---------------------------|--------------------|--------------|---------|------------------|
| Depleted ipsi PBS - Depleted ipsi Monocytes |                           |                    |              |         |                  |
| 0                                           | 0,0035                    | -0,31 to 0,31      | No           | ns      | >0,999           |
| 2                                           | 0,013                     | -0,30 to 0,32      | No           | ns      | >0,999           |
| 4                                           | -0,04                     | -0,35 to 0,27      | No           | ns      | >0,999           |
| 6                                           | 0,0012                    | -0,31 to 0,31      | No           | ns      | >0,999           |
| 6,05                                        | -0,0046                   | -0,31 to 0,30      | No           | ns      | >0,999           |
| 6,15                                        | 0,0087                    | -0,30 to 0,32      | No           | ns      | >0,999           |
| 6,7                                         | -0,097                    | -0,41 to 0,21      | No           | ns      | 0,992            |
| 7                                           | -0,36                     | -0,67 to -0,048    | Yes          | *       | 0,014            |
| 8                                           | -0,51                     | -0,82 to -0,20     | Yes          | ***     | <0,001           |
| 9                                           | -0,51                     | -0,82 to -0,20     | Yes          | ***     | <0,001           |
| 10                                          | -0,42                     | -0,72 to -0,11     | Yes          | **      | 0,003            |

| Test details                                | Predicted (LS) mean 1 | Predicted (LS) mean 2 | Predicted (LS) mean diff. | SE of diff. | N1 | N2 | t | DF |
|---------------------------------------------|-----------------------|-----------------------|---------------------------|-------------|----|----|---|----|
| Depleted ipsi PBS - Depleted ipsi Monocytes |                       |                       |                           |             |    |    |   |    |
| 0                                           | 0,54                  | 0,54                  | 0,0035                    | 0,1         | 2  | 4  |   | 44 |
| 2                                           | 0,065                 | 0,052                 | 0,013                     | 0,1         | 2  | 4  |   | 44 |
| 4                                           | 0,042                 | 0,082                 | -0,04                     | 0,1         | 2  | 4  |   | 44 |
| 6                                           | 0,083                 | 0,082                 | 0,0012                    | 0,1         | 2  | 4  |   | 44 |
| 6,05                                        | 0,087                 | 0,092                 | -0,0046                   | 0,1         | 2  | 4  |   | 44 |
| 6,15                                        | 0,089                 | 0,08                  | 0,0087                    | 0,1         | 2  | 4  |   | 44 |
| 6,7                                         | 0,064                 | 0,16                  | -0,097                    | 0,1         | 2  | 4  |   | 44 |
| 7                                           | 0,081                 | 0,44                  | -0,36                     | 0,1         | 2  | 4  |   | 44 |
| 8                                           | 0,047                 | 0,56                  | -0,51                     | 0,1         | 2  | 4  |   | 44 |
| 9                                           | 0,077                 | 0,59                  | -0,51                     | 0,1         | 2  | 4  |   | 44 |
| 10                                          | 0,071                 | 0,49                  | -0,42                     | 0,1         | 2  | 4  |   | 44 |

Sup. Fig4E

Two-way RM ANOVA Matching: Stacked  
 Assume sphericity? Yes  
 Alpha 0,05

| Source of Variation | % of total variation | P value | P value summary | Significant? |
|---------------------|----------------------|---------|-----------------|--------------|
| Time x Treatment    | 18                   | <0,001  | ****            | Yes          |
| Time                | 36                   | <0,001  | ****            | Yes          |
| Treatment           | 16                   | <0,001  | ****            | Yes          |
| Subject             | 0,84                 | 0,519   | ns              | No           |

| ANOVA table      | SS  | DF | MS   | F (DFn, DFd)     | P value |
|------------------|-----|----|------|------------------|---------|
| Time x Treatment | 83  | 10 | 8,3  | F (10, 40) = 7,2 | P<0,001 |
| Time             | 163 | 10 | 16   | F (10, 40) = 14  | P<0,001 |
| Treatment        | 71  | 1  | 71   | F (1, 4) = 74    | P<0,001 |
| Subject          | 3,8 | 4  | 0,95 | F (4, 40) = 0,82 | P=0,519 |
| Residual         | 46  | 40 | 1,2  |                  |         |

Difference between column means  
 Mean of Depleted ipsi PBS 3,5  
 Mean of Depleted ipsi Monocytes 5,7  
 Difference between means -2,2  
 SE of difference 0,26  
 95% CI of difference -2,9 to -1,5

Data summary  
 Number of columns (Treatment) 2  
 Number of rows (Time) 11  
 Number of subjects (Subject) 6  
 Number of missing values 0

Compare each cell mean with the other cell mean in that row

Number of families 1  
 Number of comparisons per family 11  
 Alpha 0,05

| Sidak's multiple comparisons test           | Predicted (LS) mean diff. | 95,00% CI of diff. | Significant? | Summary | Adjusted P Value |
|---------------------------------------------|---------------------------|--------------------|--------------|---------|------------------|
| Depleted ipsi PBS - Depleted ipsi Monocytes |                           |                    |              |         |                  |
| 0                                           | -0,63                     | -3,4 to 2,1        | No           | ns      | >0,999           |
| 2                                           | -0,33                     | -3,1 to 2,4        | No           | ns      | >0,999           |
| 4                                           | 0,13                      | -2,6 to 2,9        | No           | ns      | >0,999           |
| 6                                           | -0,3                      | -3,1 to 2,5        | No           | ns      | >0,999           |
| 6,05                                        | -0,18                     | -2,9 to 2,6        | No           | ns      | >0,999           |
| 6,15                                        | -0,2                      | -3,0 to 2,6        | No           | ns      | >0,999           |
| 6,7                                         | -1,5                      | -4,2 to 1,3        | No           | ns      | 0,745            |
| 7                                           | -5                        | -7,8 to -2,3       | Yes          | ****    | <0,001           |
| 8                                           | -5,4                      | -8,2 to -2,7       | Yes          | ****    | <0,001           |
| 9                                           | -5,2                      | -8,0 to -2,4       | Yes          | ****    | <0,001           |
| 10                                          | -5,6                      | -8,3 to -2,8       | Yes          | ****    | <0,001           |

| Test details                                | Predicted (LS) mean 1 | Predicted (LS) mean 2 | Predicted (LS) mean diff. | SE of diff. | N1 | N2 | t    | DF |
|---------------------------------------------|-----------------------|-----------------------|---------------------------|-------------|----|----|------|----|
| Depleted ipsi PBS - Depleted ipsi Monocytes |                       |                       |                           |             |    |    |      |    |
| 0                                           | 7,3                   | 7,9                   | -0,63                     | 0,93        | 2  | 4  | 0,68 | 44 |
| 2                                           | 2,8                   | 3,2                   | -0,33                     | 0,93        | 2  | 4  | 0,35 | 44 |
| 4                                           | 3,1                   | 3                     | 0,13                      | 0,93        | 2  | 4  | 0,14 | 44 |
| 6                                           | 2,7                   | 3                     | -0,3                      | 0,93        | 2  | 4  | 0,32 | 44 |
| 6,05                                        | 2,8                   | 3                     | -0,18                     | 0,93        | 2  | 4  | 0,2  | 44 |
| 6,15                                        | 3,3                   | 3,5                   | -0,2                      | 0,93        | 2  | 4  | 0,21 | 44 |
| 6,7                                         | 2,9                   | 4,4                   | -1,5                      | 0,93        | 2  | 4  | 1,6  | 44 |
| 7                                           | 3,1                   | 8,1                   | -5                        | 0,93        | 2  | 4  | 5,4  | 44 |
| 8                                           | 3,4                   | 8,8                   | -5,4                      | 0,93        | 2  | 4  | 5,9  | 44 |
| 9                                           | 3,7                   | 8,9                   | -5,2                      | 0,93        | 2  | 4  | 5,6  | 44 |
| 10                                          | 3,2                   | 8,8                   | -5,6                      | 0,93        | 2  | 4  | 6    | 44 |

Sup. Fig4F

Two-way RM ANOVA      Matching: Stacked  
 Assume sphericity?      Yes  
 Alpha      0,05

| Source of Variation | % of total variation | P value | P value summary | Significant? |
|---------------------|----------------------|---------|-----------------|--------------|
| Time x Treatment    | 0,79                 | 0,965   | ns              | No           |
| Time                | 80                   | <0,001  | ****            | Yes          |
| Treatment           | 0,74                 | 0,186   | ns              | No           |
| Subject             | 2                    | 0,45    | ns              | No           |

  

| ANOVA table      | SS    | DF | MS     | F (DFn, DFd)     | P value |
|------------------|-------|----|--------|------------------|---------|
| Time x Treatment | 0,031 | 8  | 0,0039 | F (8, 48) = 0,29 | P=0,965 |
| Time             | 3,1   | 8  | 0,39   | F (8, 48) = 30   | P<0,001 |
| Treatment        | 0,029 | 1  | 0,029  | F (1, 6) = 2,2   | P=0,186 |
| Subject          | 0,078 | 6  | 0,013  | F (6, 48) = 0,98 | P=0,450 |
| Residual         | 0,63  | 48 | 0,013  |                  |         |

  

| Difference between column means |                |
|---------------------------------|----------------|
| Mean of Group A                 | 0,22           |
| Mean of Group C                 | 0,26           |
| Difference between means        | -0,04          |
| SE of difference                | 0,027          |
| 95% CI of difference            | -0,11 to 0,026 |

  

| Data summary                  |   |
|-------------------------------|---|
| Number of columns (Treatment) | 2 |
| Number of rows (Time)         | 9 |
| Number of subjects (Subject)  | 8 |
| Number of missing values      | 0 |

Compare each cell mean with the other cell mean in that row

Number of families      1  
 Number of comparisons per family      9  
 Alpha      0,05

| Sidak's multiple comparisons test | Mean Diff. | 95,00% CI of diff. | Significant? | Summary | Adjusted P Value |
|-----------------------------------|------------|--------------------|--------------|---------|------------------|
| Group A - Group C                 |            |                    |              |         |                  |
| 0                                 | -0,034     | -0,27 to 0,20      | No           | ns      | >0,999           |
| 2                                 | -0,02      | -0,25 to 0,21      | No           | ns      | >0,999           |
| 4                                 | -0,012     | -0,25 to 0,22      | No           | ns      | >0,999           |
| 6                                 | -0,02      | -0,25 to 0,21      | No           | ns      | >0,999           |
| 6,05                              | -0,0073    | -0,24 to 0,23      | No           | ns      | >0,999           |
| 6,15                              | -0,08      | -0,31 to 0,15      | No           | ns      | 0,973            |
| 6,4                               | -0,14      | -0,38 to 0,091     | No           | ns      | 0,547            |
| 7                                 | -0,02      | -0,25 to 0,21      | No           | ns      | >0,999           |
| 8                                 | -0,025     | -0,26 to 0,21      | No           | ns      | >0,999           |

| Test details      | Mean 1 | Mean 2 | Mean Diff. | SE of diff. | N1 | N2 | t    | DF |
|-------------------|--------|--------|------------|-------------|----|----|------|----|
| Group A - Group C |        |        |            |             |    |    |      |    |
| 0                 | 0,53   | 0,57   | -0,034     | 0,081       | 4  | 4  | 0,42 | 54 |
| 2                 | 0,046  | 0,066  | -0,02      | 0,081       | 4  | 4  | 0,25 | 54 |
| 4                 | 0,045  | 0,057  | -0,012     | 0,081       | 4  | 4  | 0,14 | 54 |
| 6                 | 0,054  | 0,074  | -0,02      | 0,081       | 4  | 4  | 0,24 | 54 |
| 6,05              | 0,055  | 0,062  | -0,0073    | 0,081       | 4  | 4  | 0,09 | 54 |
| 6,15              | 0,08   | 0,16   | -0,08      | 0,081       | 4  | 4  | 0,98 | 54 |
| 6,4               | 0,13   | 0,28   | -0,14      | 0,081       | 4  | 4  | 1,8  | 54 |
| 7                 | 0,48   | 0,5    | -0,02      | 0,081       | 4  | 4  | 0,25 | 54 |
| 8                 | 0,51   | 0,54   | -0,025     | 0,081       | 4  | 4  | 0,3  | 54 |

Sup. Fig4G

|                    |                   |
|--------------------|-------------------|
| Two-way RM ANOVA   | Matching: Stacked |
| Assume sphericity? | Yes               |
| Alpha              | 0,05              |

| Source of Variation | % of total variation | P value | P value summary | Significant? |
|---------------------|----------------------|---------|-----------------|--------------|
| Time x Treatment    | 13                   | 0,012   | *               | Yes          |
| Time                | 39                   | <0,001  | ***             | Yes          |
| Treatment           | 9,6                  | 0,004   | **              | Yes          |
| Subject             | 2,5                  | 0,371   | ns              | No           |

  

| ANOVA table      | SS   | DF | MS    | F (DFn, DFd)     | P value |
|------------------|------|----|-------|------------------|---------|
| Time x Treatment | 0,82 | 20 | 0,041 | F (20, 70) = 2,1 | P=0,012 |
| Time             | 2,4  | 10 | 0,24  | F (10, 70) = 12  | P<0,001 |
| Treatment        | 0,59 | 2  | 0,3   | F (2, 7) = 14    | P<0,004 |
| Subject          | 0,15 | 7  | 0,022 | F (7, 70) = 1,1  | P=0,371 |
| Residual         | 1,4  | 70 | 0,02  |                  |         |

|                               |    |
|-------------------------------|----|
| Data summary                  |    |
| Number of columns (Treatment) | 3  |
| Number of rows (Time)         | 11 |
| Number of subjects (Subject)  | 10 |
| Number of missing values      | 0  |

Within each row, compare columns (simple effects within rows)

|                                  |      |
|----------------------------------|------|
| Number of families               | 11   |
| Number of comparisons per family | 3    |
| Alpha                            | 0,05 |

| Tukey's multiple comparisons test                                           | Predicted (LS) mean diff. | 95.00% CI of diff.    | Significant?              | Summary     | Adjusted P Value |    |       |    |
|-----------------------------------------------------------------------------|---------------------------|-----------------------|---------------------------|-------------|------------------|----|-------|----|
| 0                                                                           |                           |                       |                           |             |                  |    |       |    |
| Depleted ipsi PBS vs. Depleted ipsi Classical monocytes                     | 0,0035                    | -0,29 to 0,29         | No                        | ns          | >0,999           |    |       |    |
| Depleted ipsi PBS vs. Depleted ipsi NON-Classical monocytes                 | 0,011                     | -0,28 to 0,30         | No                        | ns          | 0,996            |    |       |    |
| Depleted ipsi Classical monocytes vs. Depleted ipsi NON-Classical monocytes | 0,0074                    | -0,23 to 0,24         | No                        | ns          | 0,997            |    |       |    |
| 2                                                                           |                           |                       |                           |             |                  |    |       |    |
| Depleted ipsi PBS vs. Depleted ipsi Classical monocytes                     | 0,025                     | -0,27 to 0,32         | No                        | ns          | 0,978            |    |       |    |
| Depleted ipsi PBS vs. Depleted ipsi NON-Classical monocytes                 | -0,019                    | -0,31 to 0,27         | No                        | ns          | 0,987            |    |       |    |
| Depleted ipsi Classical monocytes vs. Depleted ipsi NON-Classical monocytes | -0,044                    | -0,28 to 0,19         | No                        | ns          | 0,9              |    |       |    |
| 4                                                                           |                           |                       |                           |             |                  |    |       |    |
| Depleted ipsi PBS vs. Depleted ipsi Classical monocytes                     | -0,0094                   | -0,30 to 0,28         | No                        | ns          | 0,997            |    |       |    |
| Depleted ipsi PBS vs. Depleted ipsi NON-Classical monocytes                 | -0,029                    | -0,32 to 0,26         | No                        | ns          | 0,969            |    |       |    |
| Depleted ipsi Classical monocytes vs. Depleted ipsi NON-Classical monocytes | -0,02                     | -0,26 to 0,22         | No                        | ns          | 0,979            |    |       |    |
| 6                                                                           |                           |                       |                           |             |                  |    |       |    |
| Depleted ipsi PBS vs. Depleted ipsi Classical monocytes                     | 0,014                     | -0,28 to 0,31         | No                        | ns          | 0,992            |    |       |    |
| Depleted ipsi PBS vs. Depleted ipsi NON-Classical monocytes                 | 0,0051                    | -0,29 to 0,30         | No                        | ns          | >0,999           |    |       |    |
| Depleted ipsi Classical monocytes vs. Depleted ipsi NON-Classical monocytes | -0,0092                   | -0,25 to 0,23         | No                        | ns          | 0,995            |    |       |    |
| 6,05                                                                        |                           |                       |                           |             |                  |    |       |    |
| Depleted ipsi PBS vs. Depleted ipsi Classical monocytes                     | 0,0078                    | -0,28 to 0,30         | No                        | ns          | 0,998            |    |       |    |
| Depleted ipsi PBS vs. Depleted ipsi NON-Classical monocytes                 | -0,064                    | -0,36 to 0,23         | No                        | ns          | 0,858            |    |       |    |
| Depleted ipsi Classical monocytes vs. Depleted ipsi NON-Classical monocytes | -0,072                    | -0,31 to 0,17         | No                        | ns          | 0,749            |    |       |    |
| 6,15                                                                        |                           |                       |                           |             |                  |    |       |    |
| Depleted ipsi PBS vs. Depleted ipsi Classical monocytes                     | 0,013                     | -0,28 to 0,30         | No                        | ns          | 0,994            |    |       |    |
| Depleted ipsi PBS vs. Depleted ipsi NON-Classical monocytes                 | -0,13                     | -0,42 to 0,16         | No                        | ns          | 0,543            |    |       |    |
| Depleted ipsi Classical monocytes vs. Depleted ipsi NON-Classical monocytes | -0,14                     | -0,38 to 0,096        | No                        | ns          | 0,333            |    |       |    |
| 6,7                                                                         |                           |                       |                           |             |                  |    |       |    |
| Depleted ipsi PBS vs. Depleted ipsi Classical monocytes                     | -0,051                    | -0,34 to 0,24         | No                        | ns          | 0,908            |    |       |    |
| Depleted ipsi PBS vs. Depleted ipsi NON-Classical monocytes                 | -0,27                     | -0,56 to 0,025        | No                        | ns          | 0,08             |    |       |    |
| Depleted ipsi Classical monocytes vs. Depleted ipsi NON-Classical monocytes | -0,22                     | -0,45 to 0,022        | No                        | ns          | 0,084            |    |       |    |
| 7                                                                           |                           |                       |                           |             |                  |    |       |    |
| Depleted ipsi PBS vs. Depleted ipsi Classical monocytes                     | -0,37                     | -0,66 to -0,080       | Yes                       | **          | 0,009            |    |       |    |
| Depleted ipsi PBS vs. Depleted ipsi NON-Classical monocytes                 | -0,48                     | -0,78 to -0,19        | Yes                       | ***         | <0,001           |    |       |    |
| Depleted ipsi Classical monocytes vs. Depleted ipsi NON-Classical monocytes | -0,11                     | -0,35 to 0,12         | No                        | ns          | 0,489            |    |       |    |
| 8                                                                           |                           |                       |                           |             |                  |    |       |    |
| Depleted ipsi PBS vs. Depleted ipsi Classical monocytes                     | -0,54                     | -0,83 to -0,25        | Yes                       | ****        | <0,001           |    |       |    |
| Depleted ipsi PBS vs. Depleted ipsi NON-Classical monocytes                 | -0,41                     | -0,70 to -0,12        | Yes                       | **          | 0,003            |    |       |    |
| Depleted ipsi Classical monocytes vs. Depleted ipsi NON-Classical monocytes | 0,13                      | -0,10 to 0,37         | No                        | ns          | 0,377            |    |       |    |
| 9                                                                           |                           |                       |                           |             |                  |    |       |    |
| Depleted ipsi PBS vs. Depleted ipsi Classical monocytes                     | -0,4                      | -0,69 to -0,10        | Yes                       | **          | 0,005            |    |       |    |
| Depleted ipsi PBS vs. Depleted ipsi NON-Classical monocytes                 | -0,37                     | -0,66 to -0,080       | Yes                       | **          | 0,009            |    |       |    |
| Depleted ipsi Classical monocytes vs. Depleted ipsi NON-Classical monocytes | 0,025                     | -0,21 to 0,26         | No                        | ns          | 0,967            |    |       |    |
| 10                                                                          |                           |                       |                           |             |                  |    |       |    |
| Depleted ipsi PBS vs. Depleted ipsi Classical monocytes                     | -0,36                     | -0,65 to -0,066       | Yes                       | *           | 0,012            |    |       |    |
| Depleted ipsi PBS vs. Depleted ipsi NON-Classical monocytes                 | -0,43                     | -0,72 to -0,14        | Yes                       | **          | 0,002            |    |       |    |
| Depleted ipsi Classical monocytes vs. Depleted ipsi NON-Classical monocytes | -0,077                    | -0,31 to 0,16         | No                        | ns          | 0,722            |    |       |    |
| Test details                                                                | Predicted (LS) mean 1     | Predicted (LS) mean 2 | Predicted (LS) mean diff. | SE of diff. | N1               | N2 | q     | DF |
| 0                                                                           |                           |                       |                           |             |                  |    |       |    |
| Depleted ipsi PBS vs. Depleted ipsi Classical monocytes                     | 0,54                      | 0,54                  | 0,0035                    | 0,12        | 2                | 4  | 0,041 | 77 |
| Depleted ipsi PBS vs. Depleted ipsi NON-Classical monocytes                 | 0,54                      | 0,53                  | 0,011                     | 0,12        | 2                | 4  | 0,13  | 77 |
| Depleted ipsi Classical monocytes vs. Depleted ipsi NON-Classical monocytes | 0,54                      | 0,53                  | 0,0074                    | 0,099       | 4                | 4  | 0,11  | 77 |
| 2                                                                           |                           |                       |                           |             |                  |    |       |    |
| Depleted ipsi PBS vs. Depleted ipsi Classical monocytes                     | 0,065                     | 0,04                  | 0,025                     | 0,12        | 2                | 4  | 0,29  | 77 |
| Depleted ipsi PBS vs. Depleted ipsi NON-Classical monocytes                 | 0,065                     | 0,084                 | -0,019                    | 0,12        | 2                | 4  | 0,22  | 77 |
| Depleted ipsi Classical monocytes vs. Depleted ipsi NON-Classical monocytes | 0,04                      | 0,084                 | -0,044                    | 0,099       | 4                | 4  | 0,62  | 77 |
| 4                                                                           |                           |                       |                           |             |                  |    |       |    |
| Depleted ipsi PBS vs. Depleted ipsi Classical monocytes                     | 0,042                     | 0,051                 | -0,0094                   | 0,12        | 2                | 4  | 0,11  | 77 |
| Depleted ipsi PBS vs. Depleted ipsi NON-Classical monocytes                 | 0,042                     | 0,071                 | -0,029                    | 0,12        | 2                | 4  | 0,34  | 77 |
| Depleted ipsi Classical monocytes vs. Depleted ipsi NON-Classical monocytes | 0,051                     | 0,071                 | -0,02                     | 0,099       | 4                | 4  | 0,28  | 77 |
| 6                                                                           |                           |                       |                           |             |                  |    |       |    |
| Depleted ipsi PBS vs. Depleted ipsi Classical monocytes                     | 0,083                     | 0,069                 | 0,014                     | 0,12        | 2                | 4  | 0,17  | 77 |
| Depleted ipsi PBS vs. Depleted ipsi NON-Classical monocytes                 | 0,083                     | 0,078                 | 0,0051                    | 0,12        | 2                | 4  | 0,06  | 77 |
| Depleted ipsi Classical monocytes vs. Depleted ipsi NON-Classical monocytes | 0,069                     | 0,078                 | -0,0092                   | 0,099       | 4                | 4  | 0,13  | 77 |
| 6,05                                                                        |                           |                       |                           |             |                  |    |       |    |
| Depleted ipsi PBS vs. Depleted ipsi Classical monocytes                     | 0,087                     | 0,079                 | 0,0078                    | 0,12        | 2                | 4  | 0,091 | 77 |
| Depleted ipsi PBS vs. Depleted ipsi NON-Classical monocytes                 | 0,087                     | 0,15                  | -0,064                    | 0,12        | 2                | 4  | 0,75  | 77 |
| Depleted ipsi Classical monocytes vs. Depleted ipsi NON-Classical monocytes | 0,079                     | 0,15                  | -0,072                    | 0,099       | 4                | 4  | 1     | 77 |
| 6,15                                                                        |                           |                       |                           |             |                  |    |       |    |
| Depleted ipsi PBS vs. Depleted ipsi Classical monocytes                     | 0,089                     | 0,076                 | 0,013                     | 0,12        | 2                | 4  | 0,15  | 77 |
| Depleted ipsi PBS vs. Depleted ipsi NON-Classical monocytes                 | 0,089                     | 0,22                  | -0,13                     | 0,12        | 2                | 4  | 1,5   | 77 |
| Depleted ipsi Classical monocytes vs. Depleted ipsi NON-Classical monocytes | 0,076                     | 0,22                  | -0,14                     | 0,099       | 4                | 4  | 2     | 77 |
| 6,7                                                                         |                           |                       |                           |             |                  |    |       |    |
| Depleted ipsi PBS vs. Depleted ipsi Classical monocytes                     | 0,064                     | 0,12                  | -0,051                    | 0,12        | 2                | 4  | 0,59  | 77 |
| Depleted ipsi PBS vs. Depleted ipsi NON-Classical monocytes                 | 0,064                     | 0,33                  | -0,27                     | 0,12        | 2                | 4  | 3,1   | 77 |
| Depleted ipsi Classical monocytes vs. Depleted ipsi NON-Classical monocytes | 0,12                      | 0,33                  | -0,22                     | 0,099       | 4                | 4  | 3,1   | 77 |
| 7                                                                           |                           |                       |                           |             |                  |    |       |    |
| Depleted ipsi PBS vs. Depleted ipsi Classical monocytes                     | 0,081                     | 0,45                  | -0,37                     | 0,12        | 2                | 4  | 4,3   | 77 |
| Depleted ipsi PBS vs. Depleted ipsi NON-Classical monocytes                 | 0,081                     | 0,57                  | -0,48                     | 0,12        | 2                | 4  | 5,6   | 77 |
| Depleted ipsi Classical monocytes vs. Depleted ipsi NON-Classical monocytes | 0,45                      | 0,57                  | -0,11                     | 0,099       | 4                | 4  | 1,6   | 77 |
| 8                                                                           |                           |                       |                           |             |                  |    |       |    |
| Depleted ipsi PBS vs. Depleted ipsi Classical monocytes                     | 0,047                     | 0,59                  | -0,54                     | 0,12        | 2                | 4  | 6,3   | 77 |
| Depleted ipsi PBS vs. Depleted ipsi NON-Classical monocytes                 | 0,047                     | 0,46                  | -0,41                     | 0,12        | 2                | 4  | 4,8   | 77 |
| Depleted ipsi Classical monocytes vs. Depleted ipsi NON-Classical monocytes | 0,59                      | 0,46                  | 0,13                      | 0,099       | 4                | 4  | 1,9   | 77 |
| 9                                                                           |                           |                       |                           |             |                  |    |       |    |
| Depleted ipsi PBS vs. Depleted ipsi Classical monocytes                     | 0,077                     | 0,47                  | -0,4                      | 0,12        | 2                | 4  | 4,6   | 77 |
| Depleted ipsi PBS vs. Depleted ipsi NON-Classical monocytes                 | 0,077                     | 0,45                  | -0,37                     | 0,12        | 2                | 4  | 4,3   | 77 |
| Depleted ipsi Classical monocytes vs. Depleted ipsi NON-Classical monocytes | 0,47                      | 0,45                  | 0,025                     | 0,099       | 4                | 4  | 0,35  | 77 |
| 10                                                                          |                           |                       |                           |             |                  |    |       |    |
| Depleted ipsi PBS vs. Depleted ipsi Classical monocytes                     | 0,071                     | 0,43                  | -0,36                     | 0,12        | 2                | 4  | 4,1   | 77 |
| Depleted ipsi PBS vs. Depleted ipsi NON-Classical monocytes                 | 0,071                     | 0,5                   | -0,43                     | 0,12        | 2                | 4  | 5     | 77 |
| Depleted ipsi Classical monocytes vs. Depleted ipsi NON-Classical monocytes | 0,43                      | 0,5                   | -0,077                    | 0,099       | 4                | 4  | 1,1   | 77 |

Sup. Fig#11

Table Analyzed MMdtr - Classic/Non-classic splenocyte transfer CT \_\_\_\_HG

Two-way RM ANOVA Matching: Stacked

Assume sphericity? Yes

Alpha 0.05

| Source of Variation | % of total variation | P value | P value summary | Significant? |
|---------------------|----------------------|---------|-----------------|--------------|
| Time x Treatment    | 14                   | <0.001  | ****            | Yes          |
| Time                | 45                   | <0.001  | ****            | Yes          |
| Treatment           | 9.6                  | 0.003   | **              | Yes          |
| Subject             | 2.2                  | 0.084   | ns              | No           |

| ANOVA table      | SS  | DF | MS  | F (DFn, DFd)     | P value |
|------------------|-----|----|-----|------------------|---------|
| Time x Treatment | 109 | 20 | 5.4 | F (20, 70) = 4.4 | P<0.001 |
| Time             | 342 | 10 | 34  | F (10, 70) = 27  | P<0.001 |
| Treatment        | 73  | 2  | 37  | F (2, 7) = 16    | P=0.003 |
| Subject          | 16  | 7  | 2.4 | F (7, 70) = 1.9  | P=0.084 |
| Residual         | 87  | 70 | 1.2 |                  |         |

Data summary

Number of columns (Treatment) 3  
 Number of rows (Time) 11  
 Number of subjects (Subject) 10  
 Number of missing values 0

Within each row, compare columns (simple effects within rows)

Number of families 11  
 Number of comparisons per family 3  
 Alpha 0.05

Tukey's multiple comparisons test Predicted (LS) mean diff. 95.00% CI of diff. Significant? Summary Adjusted P Value

|                                                                               | Predicted (LS) mean diff. | 95.00% CI of diff. | Significant? | Summary | Adjusted P Value |
|-------------------------------------------------------------------------------|---------------------------|--------------------|--------------|---------|------------------|
| 0                                                                             |                           |                    |              |         |                  |
| Depleted (psi) PBS vs. Depleted (psi) Classical monocytes                     | -0.79                     | -3.2 to 1.6        | No           | ns      | 0.71             |
| Depleted (psi) PBS vs. Depleted (psi) NON-Classical monocytes                 | -0.27                     | -2.7 to 2.1        | No           | ns      | 0.961            |
| Depleted (psi) Classical monocytes vs. Depleted (psi) NON-Classical monocytes | 0.52                      | -1.4 to 2.5        | No           | ns      | 0.8              |
| 2                                                                             |                           |                    |              |         |                  |
| Depleted (psi) PBS vs. Depleted (psi) Classical monocytes                     | -0.33                     | -2.7 to 2.1        | No           | ns      | 0.942            |
| Depleted (psi) PBS vs. Depleted (psi) NON-Classical monocytes                 | -0.016                    | -2.4 to 2.4        | No           | ns      | >0.999           |
| Depleted (psi) Classical monocytes vs. Depleted (psi) NON-Classical monocytes | 0.32                      | -1.6 to 2.3        | No           | ns      | 0.922            |
| 4                                                                             |                           |                    |              |         |                  |
| Depleted (psi) PBS vs. Depleted (psi) Classical monocytes                     | 0.00083                   | -2.4 to 2.4        | No           | ns      | >0.999           |
| Depleted (psi) PBS vs. Depleted (psi) NON-Classical monocytes                 | 0.13                      | -2.3 to 2.5        | No           | ns      | 0.991            |
| Depleted (psi) Classical monocytes vs. Depleted (psi) NON-Classical monocytes | 0.13                      | -1.8 to 2.1        | No           | ns      | 0.987            |
| 6                                                                             |                           |                    |              |         |                  |
| Depleted (psi) PBS vs. Depleted (psi) Classical monocytes                     | -0.5                      | -2.9 to 1.9        | No           | ns      | 0.87             |
| Depleted (psi) PBS vs. Depleted (psi) NON-Classical monocytes                 | -0.41                     | -2.8 to 2.0        | No           | ns      | 0.911            |
| Depleted (psi) Classical monocytes vs. Depleted (psi) NON-Classical monocytes | 0.091                     | -1.9 to 2.1        | No           | ns      | 0.993            |
| 6.05                                                                          |                           |                    |              |         |                  |
| Depleted (psi) PBS vs. Depleted (psi) Classical monocytes                     | -0.41                     | -2.8 to 2.0        | No           | ns      | 0.914            |
| Depleted (psi) PBS vs. Depleted (psi) NON-Classical monocytes                 | -0.57                     | -3.0 to 1.8        | No           | ns      | 0.836            |
| Depleted (psi) Classical monocytes vs. Depleted (psi) NON-Classical monocytes | -0.17                     | -2.1 to 1.8        | No           | ns      | 0.977            |
| 6.15                                                                          |                           |                    |              |         |                  |
| Depleted (psi) PBS vs. Depleted (psi) Classical monocytes                     | -0.14                     | -2.5 to 2.3        | No           | ns      | 0.989            |
| Depleted (psi) PBS vs. Depleted (psi) NON-Classical monocytes                 | -0.51                     | -2.9 to 1.9        | No           | ns      | 0.868            |
| Depleted (psi) Classical monocytes vs. Depleted (psi) NON-Classical monocytes | -0.37                     | -2.3 to 1.6        | No           | ns      | 0.896            |
| 6.7                                                                           |                           |                    |              |         |                  |
| Depleted (psi) PBS vs. Depleted (psi) Classical monocytes                     | -0.4                      | -2.8 to 2.0        | No           | ns      | 0.918            |
| Depleted (psi) PBS vs. Depleted (psi) NON-Classical monocytes                 | -0.98                     | -3.4 to 1.4        | No           | ns      | 0.597            |
| Depleted (psi) Classical monocytes vs. Depleted (psi) NON-Classical monocytes | -0.58                     | -2.5 to 1.4        | No           | ns      | 0.761            |
| 7                                                                             |                           |                    |              |         |                  |
| Depleted (psi) PBS vs. Depleted (psi) Classical monocytes                     | -2.2                      | -4.6 to 0.25       | No           | ns      | 0.088            |
| Depleted (psi) PBS vs. Depleted (psi) NON-Classical monocytes                 | -5.7                      | -8.1 to -3.3       | Yes          | ****    | <0.001           |
| Depleted (psi) Classical monocytes vs. Depleted (psi) NON-Classical monocytes | -3.5                      | -5.9 to -1.6       | Yes          | ***     | <0.001           |
| 8                                                                             |                           |                    |              |         |                  |
| Depleted (psi) PBS vs. Depleted (psi) Classical monocytes                     | -5.5                      | -7.9 to -3.1       | Yes          | ****    | <0.001           |
| Depleted (psi) PBS vs. Depleted (psi) NON-Classical monocytes                 | -5.4                      | -7.8 to -3.0       | Yes          | ****    | <0.001           |
| Depleted (psi) Classical monocytes vs. Depleted (psi) NON-Classical monocytes | 0.11                      | -1.8 to 2.1        | No           | ns      | 0.99             |
| 9                                                                             |                           |                    |              |         |                  |
| Depleted (psi) PBS vs. Depleted (psi) Classical monocytes                     | -4.4                      | -6.8 to -2.0       | Yes          | ***     | <0.001           |
| Depleted (psi) PBS vs. Depleted (psi) NON-Classical monocytes                 | -4.5                      | -6.9 to -2.1       | Yes          | ****    | <0.001           |
| Depleted (psi) Classical monocytes vs. Depleted (psi) NON-Classical monocytes | -0.13                     | -2.1 to 1.8        | No           | ns      | 0.986            |
| 10                                                                            |                           |                    |              |         |                  |
| Depleted (psi) PBS vs. Depleted (psi) Classical monocytes                     | -5.2                      | -7.6 to -2.8       | Yes          | ****    | <0.001           |
| Depleted (psi) PBS vs. Depleted (psi) NON-Classical monocytes                 | -5.8                      | -8.2 to -3.4       | Yes          | ****    | <0.001           |
| Depleted (psi) Classical monocytes vs. Depleted (psi) NON-Classical monocytes | -0.58                     | -2.5 to 1.4        | No           | ns      | 0.761            |

Test details Predicted (LS) mean 1 Predicted (LS) mean 2 Predicted (LS) mean diff. SE of diff. N1 N2 q DF

|                                                                               | Predicted (LS) mean 1 | Predicted (LS) mean 2 | Predicted (LS) mean diff. | SE of diff. | N1 | N2 | q      | DF |
|-------------------------------------------------------------------------------|-----------------------|-----------------------|---------------------------|-------------|----|----|--------|----|
| 0                                                                             |                       |                       |                           |             |    |    |        |    |
| Depleted (psi) PBS vs. Depleted (psi) Classical monocytes                     | 7.3                   | 8.1                   | -0.79                     | 1           | 2  | 4  | 1.1    | 77 |
| Depleted (psi) PBS vs. Depleted (psi) NON-Classical monocytes                 | 7.3                   | 7.6                   | -0.27                     | 1           | 2  | 4  | 0.38   | 77 |
| Depleted (psi) Classical monocytes vs. Depleted (psi) NON-Classical monocytes | 8.1                   | 7.6                   | 0.52                      | 0.82        | 4  | 4  | 0.9    | 77 |
| 2                                                                             |                       |                       |                           |             |    |    |        |    |
| Depleted (psi) PBS vs. Depleted (psi) Classical monocytes                     | 2.8                   | 3.2                   | -0.33                     | 1           | 2  | 4  | 0.47   | 77 |
| Depleted (psi) PBS vs. Depleted (psi) NON-Classical monocytes                 | 2.8                   | 2.8                   | -0.016                    | 1           | 2  | 4  | 0.023  | 77 |
| Depleted (psi) Classical monocytes vs. Depleted (psi) NON-Classical monocytes | 3.2                   | 2.8                   | 0.32                      | 0.82        | 4  | 4  | 0.54   | 77 |
| 4                                                                             |                       |                       |                           |             |    |    |        |    |
| Depleted (psi) PBS vs. Depleted (psi) Classical monocytes                     | 3.1                   | 3.1                   | 0.00083                   | 1           | 2  | 4  | 0.0012 | 77 |
| Depleted (psi) PBS vs. Depleted (psi) NON-Classical monocytes                 | 3.1                   | 3                     | 0.13                      | 0.82        | 2  | 4  | 0.18   | 77 |
| Depleted (psi) Classical monocytes vs. Depleted (psi) NON-Classical monocytes | 3.1                   | 3                     | 0.13                      | 0.82        | 4  | 4  | 0.22   | 77 |
| 6                                                                             |                       |                       |                           |             |    |    |        |    |
| Depleted (psi) PBS vs. Depleted (psi) Classical monocytes                     | 2.7                   | 3.3                   | -0.5                      | 1           | 2  | 4  | 0.71   | 77 |
| Depleted (psi) PBS vs. Depleted (psi) NON-Classical monocytes                 | 2.7                   | 3.2                   | -0.41                     | 1           | 2  | 4  | 0.58   | 77 |
| Depleted (psi) Classical monocytes vs. Depleted (psi) NON-Classical monocytes | 3.3                   | 3.2                   | 0.091                     | 0.82        | 4  | 4  | 0.16   | 77 |
| 6.05                                                                          |                       |                       |                           |             |    |    |        |    |
| Depleted (psi) PBS vs. Depleted (psi) Classical monocytes                     | 2.8                   | 3.2                   | -0.41                     | 1           | 2  | 4  | 0.57   | 77 |
| Depleted (psi) PBS vs. Depleted (psi) NON-Classical monocytes                 | 2.8                   | 3.4                   | -0.57                     | 1           | 2  | 4  | 0.81   | 77 |
| Depleted (psi) Classical monocytes vs. Depleted (psi) NON-Classical monocytes | 3.2                   | 3.4                   | -0.17                     | 0.82        | 4  | 4  | 0.29   | 77 |
| 6.15                                                                          |                       |                       |                           |             |    |    |        |    |
| Depleted (psi) PBS vs. Depleted (psi) Classical monocytes                     | 3.3                   | 3.4                   | -0.14                     | 1           | 2  | 4  | 0.2    | 77 |
| Depleted (psi) PBS vs. Depleted (psi) NON-Classical monocytes                 | 3.3                   | 3.8                   | -0.51                     | 1           | 2  | 4  | 0.72   | 77 |
| Depleted (psi) Classical monocytes vs. Depleted (psi) NON-Classical monocytes | 3.4                   | 3.8                   | -0.37                     | 0.82        | 4  | 4  | 0.63   | 77 |
| 6.7                                                                           |                       |                       |                           |             |    |    |        |    |
| Depleted (psi) PBS vs. Depleted (psi) Classical monocytes                     | 2.9                   | 3.3                   | -0.4                      | 1           | 2  | 4  | 0.56   | 77 |
| Depleted (psi) PBS vs. Depleted (psi) NON-Classical monocytes                 | 2.9                   | 3.9                   | -0.98                     | 1           | 2  | 4  | 1.4    | 77 |
| Depleted (psi) Classical monocytes vs. Depleted (psi) NON-Classical monocytes | 3.3                   | 3.9                   | -0.58                     | 0.82        | 4  | 4  | 1      | 77 |
| 7                                                                             |                       |                       |                           |             |    |    |        |    |
| Depleted (psi) PBS vs. Depleted (psi) Classical monocytes                     | 3.1                   | 5.2                   | -2.2                      | 1           | 2  | 4  | 3      | 77 |
| Depleted (psi) PBS vs. Depleted (psi) NON-Classical monocytes                 | 3.1                   | 8.7                   | -5.7                      | 1           | 2  | 4  | 8      | 77 |
| Depleted (psi) Classical monocytes vs. Depleted (psi) NON-Classical monocytes | 5.2                   | 8.7                   | -3.5                      | 0.82        | 4  | 4  | 6.1    | 77 |
| 8                                                                             |                       |                       |                           |             |    |    |        |    |
| Depleted (psi) PBS vs. Depleted (psi) Classical monocytes                     | 3.4                   | 8.9                   | -5.5                      | 1           | 2  | 4  | 7.7    | 77 |
| Depleted (psi) PBS vs. Depleted (psi) NON-Classical monocytes                 | 3.4                   | 8.8                   | -5.4                      | 1           | 2  | 4  | 7.6    | 77 |
| Depleted (psi) Classical monocytes vs. Depleted (psi) NON-Classical monocytes | 8.9                   | 8.8                   | 0.11                      | 0.82        | 4  | 4  | 0.19   | 77 |
| 9                                                                             |                       |                       |                           |             |    |    |        |    |
| Depleted (psi) PBS vs. Depleted (psi) Classical monocytes                     | 3.7                   | 8.1                   | -4.4                      | 1           | 2  | 4  | 6.2    | 77 |
| Depleted (psi) PBS vs. Depleted (psi) NON-Classical monocytes                 | 3.7                   | 8.3                   | -4.5                      | 1           | 2  | 4  | 6.4    | 77 |
| Depleted (psi) Classical monocytes vs. Depleted (psi) NON-Classical monocytes | 8.1                   | 8.3                   | -0.13                     | 0.82        | 4  | 4  | 0.23   | 77 |
| 10                                                                            |                       |                       |                           |             |    |    |        |    |
| Depleted (psi) PBS vs. Depleted (psi) Classical monocytes                     | 3.2                   | 8.4                   | -5.2                      | 1           | 2  | 4  | 7.3    | 77 |
| Depleted (psi) PBS vs. Depleted (psi) NON-Classical monocytes                 | 3.2                   | 9                     | -5.8                      | 1           | 2  | 4  | 8.2    | 77 |
| Depleted (psi) Classical monocytes vs. Depleted (psi) NON-Classical monocytes | 8.4                   | 9                     | -0.58                     | 0.82        | 4  | 4  | 1      | 77 |

Sup. Fig4

| Two-way ANOVA                 |                      | Ordinary      |                 |              |                 |         |
|-------------------------------|----------------------|---------------|-----------------|--------------|-----------------|---------|
| Alpha                         |                      | 0,05          |                 |              |                 |         |
| Source of Variation           | % of total variation | P value       | P value summary | Significant? |                 |         |
| Interaction                   | 21                   | 0,002         | **              | Yes          |                 |         |
| Time                          | 25                   | <0,001        | ****            | Yes          |                 |         |
| Cell type                     | 14                   | <0,001        | ***             | Yes          |                 |         |
| ANOVA table                   |                      | SS (Type III) | DF              | MS           | F (DFn, DFd)    | P value |
| Interaction                   |                      | 3190001       | 8               | 398750       | F (8, 57) = 3,6 | P=0,002 |
| Time                          |                      | 3861989       | 4               | 965497       | F (4, 57) = 8,6 | P<0,001 |
| Cell type                     |                      | 2098055       | 2               | 1049028      | F (2, 57) = 9,3 | P<0,001 |
| Residual                      |                      | 6398058       | 57              | 112247       |                 |         |
| Data summary                  |                      |               |                 |              |                 |         |
| Number of columns (Cell type) | 3                    |               |                 |              |                 |         |
| Number of rows (Time)         | 5                    |               |                 |              |                 |         |
| Number of values              | 72                   |               |                 |              |                 |         |

Within each column, compare rows (simple effects within columns)

| Dunnett's multiple comparisons test |  | Predicted (LS) mean diff. | 95,00% CI of diff. | Significant? | Summary | Adjusted P Value |
|-------------------------------------|--|---------------------------|--------------------|--------------|---------|------------------|
| <b>CD206 (M2)</b>                   |  |                           |                    |              |         |                  |
| 0 vs. 1                             |  | 53                        | -469 to 575        | No           | ns      | 0,998            |
| 0 vs. 2                             |  | -98                       | -620 to 425        | No           | ns      | 0,977            |
| 0 vs. 3                             |  | -1392                     | -1914 to -869      | Yes          | ****    | <0,001           |
| 0 vs. 7                             |  | -33                       | -555 to 489        | No           | ns      | >0,999           |
| <b>INOS (M1)</b>                    |  |                           |                    |              |         |                  |
| 0 vs. 1                             |  | 37                        | -485 to 559        | No           | ns      | >0,999           |
| 0 vs. 2                             |  | 23                        | -499 to 545        | No           | ns      | >0,999           |
| 0 vs. 3                             |  | -161                      | -683 to 361        | No           | ns      | 0,876            |
| 0 vs. 7                             |  | 7                         | -515 to 529        | No           | ns      | >0,999           |
| <b>Others</b>                       |  |                           |                    |              |         |                  |
| 0 vs. 1                             |  | -295                      | -817 to 227        | No           | ns      | 0,453            |
| 0 vs. 2                             |  | -220                      | -743 to 302        | No           | ns      | 0,702            |
| 0 vs. 3                             |  | -402                      | -924 to 120        | No           | ns      | 0,184            |
| 0 vs. 7                             |  | -38                       | -560 to 484        | No           | ns      | >0,999           |

| Test details      | Predicted (LS) mean 1 | Predicted (LS) mean 2 | Predicted (LS) mean diff. | SE of diff. | N1 | N2 | q     | DF |
|-------------------|-----------------------|-----------------------|---------------------------|-------------|----|----|-------|----|
| <b>CD206 (M2)</b> |                       |                       |                           |             |    |    |       |    |
| 0 vs. 1           | 224                   | 171                   | 53                        | 205         | 8  | 4  | 0,26  | 57 |
| 0 vs. 2           | 224                   | 322                   | -98                       | 205         | 8  | 4  | 0,48  | 57 |
| 0 vs. 3           | 224                   | 1616                  | -1392                     | 205         | 8  | 4  | 6,8   | 57 |
| 0 vs. 7           | 224                   | 257                   | -33                       | 205         | 8  | 4  | 0,16  | 57 |
| <b>INOS (M1)</b>  |                       |                       |                           |             |    |    |       |    |
| 0 vs. 1           | 70                    | 34                    | 37                        | 205         | 8  | 4  | 0,18  | 57 |
| 0 vs. 2           | 70                    | 47                    | 23                        | 205         | 8  | 4  | 0,11  | 57 |
| 0 vs. 3           | 70                    | 231                   | -161                      | 205         | 8  | 4  | 0,78  | 57 |
| 0 vs. 7           | 70                    | 63                    | 7                         | 205         | 8  | 4  | 0,034 | 57 |
| <b>Others</b>     |                       |                       |                           |             |    |    |       |    |
| 0 vs. 1           | 51                    | 346                   | -295                      | 205         | 8  | 4  | 1,4   | 57 |
| 0 vs. 2           | 51                    | 272                   | -220                      | 205         | 8  | 4  | 1,1   | 57 |
| 0 vs. 3           | 51                    | 453                   | -402                      | 205         | 8  | 4  | 2     | 57 |
| 0 vs. 7           | 51                    | 89                    | -38                       | 205         | 8  | 4  | 0,18  | 57 |

Sup. Fig4J

Two-way RM ANOVA Matching: Stacked  
 Assume sphericity? Yes  
 Alpha 0,05

| Source of Variation | % of total variation | P value | P value summary | Significant? |
|---------------------|----------------------|---------|-----------------|--------------|
| Time x Treatment    | 22                   | <0,001  | ***             | Yes          |
| Time                | 47                   | <0,001  | ***             | Yes          |
| Treatment           | 15                   | <0,001  | ***             | Yes          |
| Subject             | 3,2                  | 0,02    | *               | Yes          |

| ANOVA table      | SS  | DF | MS  | F (DFn, DFd)    | P value |
|------------------|-----|----|-----|-----------------|---------|
| Time x Treatment | 143 | 10 | 14  | F (10, 80) = 14 | P<0,001 |
| Time             | 301 | 10 | 30  | F (10, 80) = 29 | P<0,001 |
| Treatment        | 96  | 1  | 96  | F (1, 8) = 37   | P<0,001 |
| Subject          | 21  | 8  | 2,6 | F (8, 80) = 2,5 | P=0,020 |
| Residual         | 84  | 80 | 1   |                 |         |

Difference between column means

|                          |              |
|--------------------------|--------------|
| Mean of Depleted carr M1 | 3,8          |
| Mean of Depleted carr M2 | 5,7          |
| Difference between means | -1,9         |
| SE of difference         | 0,31         |
| 95% CI of difference     | -2,6 to -1,2 |

Data summary  
 Number of columns (Treatment) 2  
 Number of rows (Time) 11  
 Number of subjects (Subject) 10  
 Number of missing values 0

Compare each cell mean with the other cell mean in that row

Number of families 1  
 Number of comparisons per family 11  
 Alpha 0,05

| Sidak's multiple comparisons test   | Mean Diff. | 95,00% CI of diff. | Significant? | Summary | Adjusted P Value |
|-------------------------------------|------------|--------------------|--------------|---------|------------------|
| Depleted carr M1 - Depleted carr M2 |            |                    |              |         |                  |
| 0                                   | 0,23       | -1,8 to 2,2        | No           | ns      | >0,999           |
| 2                                   | -0,25      | -2,3 to 1,7        | No           | ns      | >0,999           |
| 4                                   | 0,073      | -1,9 to 2,1        | No           | ns      | >0,999           |
| 6                                   | 0,63       | -1,4 to 2,6        | No           | ns      | 0,993            |
| 6,05                                | 0,7        | -1,3 to 2,7        | No           | ns      | 0,985            |
| 6,15                                | -0,9       | -2,9 to 1,1        | No           | ns      | 0,908            |
| 6,7                                 | -2,4       | -4,4 to -0,42      | Yes          | **      | 0,008            |
| 7                                   | -5,3       | -7,3 to -3,3       | Yes          | ****    | <0,001           |
| 8                                   | -4,8       | -6,9 to -2,8       | Yes          | ****    | <0,001           |
| 9                                   | -4,7       | -6,7 to -2,7       | Yes          | ****    | <0,001           |
| 10                                  | -3,8       | -5,8 to -1,8       | Yes          | ****    | <0,001           |

| Test details                        | Mean 1 | Mean 2 | Mean Diff. | SE of diff. | N1 | N2 | t    | DF |
|-------------------------------------|--------|--------|------------|-------------|----|----|------|----|
| Depleted carr M1 - Depleted carr M2 |        |        |            |             |    |    |      |    |
| 0                                   | 8,3    | 8      | 0,23       | 0,69        | 5  | 5  | 0,33 | 88 |
| 2                                   | 2,6    | 2,8    | -0,25      | 0,69        | 5  | 5  | 0,37 | 88 |
| 4                                   | 2,8    | 2,7    | 0,073      | 0,69        | 5  | 5  | 0,11 | 88 |
| 6                                   | 3,4    | 2,8    | 0,63       | 0,69        | 5  | 5  | 0,91 | 88 |
| 6,05                                | 4,1    | 3,4    | 0,7        | 0,69        | 5  | 5  | 1    | 88 |
| 6,15                                | 3,2    | 4,1    | -0,9       | 0,69        | 5  | 5  | 1,3  | 88 |
| 6,7                                 | 3,5    | 6      | -2,4       | 0,69        | 5  | 5  | 3,5  | 88 |
| 7                                   | 3,3    | 8,6    | -5,3       | 0,69        | 5  | 5  | 7,7  | 88 |
| 8                                   | 3,1    | 7,9    | -4,8       | 0,69        | 5  | 5  | 7    | 88 |
| 9                                   | 3,7    | 8,3    | -4,7       | 0,69        | 5  | 5  | 6,8  | 88 |
| 10                                  | 4,2    | 8      | -3,8       | 0,69        | 5  | 5  | 5,5  | 88 |

Sup. Fig4K

Two-way RM ANOVA Matching: Stacked  
 Assume sphericity? Yes  
 Alpha 0,05

| Source of Variation | % of total variation | P value | P value summary | Significant? |
|---------------------|----------------------|---------|-----------------|--------------|
| Time x Treatment    | 0,78                 | 0,907   | ns              | No           |
| Time                | 71                   | <0,001  | ****            | Yes          |
| Treatment           | 0,51                 | 0,433   | ns              | No           |
| Subject             | 7,6                  | 0,008   | **              | Yes          |

| ANOVA table      | SS    | DF | MS     | F (DFn, DFd)     | P value |
|------------------|-------|----|--------|------------------|---------|
| Time x Treatment | 0,043 | 7  | 0,0061 | F (7, 70) = 0,39 | P=0,907 |
| Time             | 3,9   | 7  | 0,56   | F (7, 70) = 35   | P<0,001 |
| Treatment        | 0,028 | 1  | 0,028  | F (1, 10) = 0,67 | P=0,433 |
| Subject          | 0,42  | 10 | 0,042  | F (10, 70) = 2,7 | P=0,008 |
| Residual         | 1,1   | 70 | 0,016  |                  |         |

Difference between column means  
 Mean of WT 0,24  
 Mean of Nav1.8-IL10<sup>-/-</sup> 0,21  
 Difference between means 0,034  
 SE of difference 0,042  
 95% CI of difference -0,059 to 0,13

Data summary  
 Number of columns (Treat 2)  
 Number of rows (Time) 8  
 Number of subjects (Subje 12)  
 Number of missing values 0

Compare each cell mean with the other cell mean in that row

Number of families 1  
 Number of comparisons per 8  
 Alpha 0,05

| Sidak's multiple comparisc      | Mean Diff, | 95,00% CI of diff, | Significant? | Summary | Adjusted P Value |
|---------------------------------|------------|--------------------|--------------|---------|------------------|
| WT - Nav1.8-IL10 <sup>-/-</sup> |            |                    |              |         |                  |
| 0                               | 0,046      | -0,18 to 0,27      | No           | ns      | 0,999            |
| 1                               | -0,0066    | -0,23 to 0,22      | No           | ns      | >0,999           |
| 2                               | -0,005     | -0,23 to 0,22      | No           | ns      | >0,999           |
| 3                               | -0,012     | -0,23 to 0,21      | No           | ns      | >0,999           |
| 4                               | 0,04       | -0,18 to 0,26      | No           | ns      | >0,999           |
| 6                               | 0,084      | -0,14 to 0,31      | No           | ns      | 0,939            |
| 8                               | 0,11       | -0,11 to 0,33      | No           | ns      | 0,767            |
| 10                              | 0,016      | -0,21 to 0,24      | No           | ns      | >0,999           |

| Test details                    | Mean 1 | Mean 2 | Mean Diff, | SE of diff, | N1 | N2 | t     | DF |
|---------------------------------|--------|--------|------------|-------------|----|----|-------|----|
| WT - Nav1.8-IL10 <sup>-/-</sup> |        |        |            |             |    |    |       |    |
| 0                               | 0,66   | 0,62   | 0,046      | 0,08        | 6  | 6  | 0,57  | 80 |
| 1                               | 0,024  | 0,03   | -0,0066    | 0,08        | 6  | 6  | 0,083 | 80 |
| 2                               | 0,025  | 0,03   | -0,005     | 0,08        | 6  | 6  | 0,063 | 80 |
| 3                               | 0,033  | 0,045  | -0,012     | 0,08        | 6  | 6  | 0,15  | 80 |
| 4                               | 0,15   | 0,11   | 0,04       | 0,08        | 6  | 6  | 0,5   | 80 |
| 6                               | 0,29   | 0,21   | 0,084      | 0,08        | 6  | 6  | 1,1   | 80 |
| 8                               | 0,39   | 0,28   | 0,11       | 0,08        | 6  | 6  | 1,4   | 80 |
| 10                              | 0,38   | 0,36   | 0,016      | 0,08        | 6  | 6  | 0,2   | 80 |



## Sup. Fig5B

|                                        |                    |
|----------------------------------------|--------------------|
| Column B                               | 1                  |
| vs.                                    | vs.                |
| Column A                               | 0                  |
| Unpaired t test                        |                    |
| P value                                | 0,0451             |
| P value summary                        | *                  |
| Significantly different (P < 0.05)?    | Yes                |
| One- or two-tailed P value?            | Two-tailed         |
| t, df                                  | t=2,372, df=8      |
| How big is the difference?             |                    |
| Mean of column A                       | 2,899              |
| Mean of column B                       | 2,1                |
| Difference between means (B - A) ± SEM | -0,7989 ± 0,3369   |
| 95% confidence interval                | -1,576 to -0,02210 |
| R squared (eta squared)                | 0,4128             |
| F test to compare variances            |                    |
| F, DF <sub>n</sub> , D <sub>fd</sub>   | 2,677, 4, 4        |
| P value                                | 0,3633             |
| P value summary                        | ns                 |
| Significantly different (P < 0.05)?    | No                 |
| Data analyzed                          |                    |
| Sample size, column A                  | 5                  |
| Sample size, column B                  | 5                  |
|                                        |                    |
| Column C                               | 3                  |
| vs.                                    | vs.                |
| Column A                               | 0                  |
| Unpaired t test                        |                    |
| P value                                | 0,1274             |
| P value summary                        | ns                 |
| Significantly different (P < 0.05)?    | No                 |
| One- or two-tailed P value?            | Two-tailed         |
| t, df                                  | t=1,701, df=8      |
| How big is the difference?             |                    |
| Mean of column A                       | 2,899              |
| Mean of column C                       | 3,999              |
| Difference between means (C - A) ± SEM | 1,099 ± 0,6465     |
| 95% confidence interval                | -0,3913 to 2,590   |
| R squared (eta squared)                | 0,2655             |
| F test to compare variances            |                    |
| F, DF <sub>n</sub> , D <sub>fd</sub>   | 4,058, 4, 4        |
| P value                                | 0,2036             |
| P value summary                        | ns                 |
| Significantly different (P < 0.05)?    | No                 |
| Data analyzed                          |                    |
| Sample size, column A                  | 5                  |
| Sample size, column C                  | 5                  |

Sup. Fig6A

|                                         |             |        |
|-----------------------------------------|-------------|--------|
| Column B                                | Macs        |        |
| vs.                                     | vs,         |        |
| Column A                                | Son         |        |
| Mann Whitney test                       |             |        |
| P value                                 |             | 0,0286 |
| Exact or approximate P value?           | Exact       |        |
| P value summary                         | *           |        |
| Significantly different ( $P < 0.05$ )? | Yes         |        |
| One- or two-tailed P value?             | Two-tailed  |        |
| Sum of ranks in column A,B              | 10 , 26     |        |
| Mann-Whitney U                          |             | 0      |
| Difference between medians              |             |        |
| Median of column A                      | 0,7000, n=4 |        |
| Median of column B                      | 13,88, n=4  |        |
| Difference: Actual                      |             | 13,18  |
| Difference: Hodges-Lehmann              |             | 12,18  |

Sup. Fig8A

Two-way RM ANOVA      Matching: Stacked  
 Assume sphericity?      Yes  
 Alpha      0,05

| Source of Variation | % of total variation | P value | P value summary | Significant? |
|---------------------|----------------------|---------|-----------------|--------------|
| Time x Treatment    | 18                   | <0,001  | ****            | Yes          |
| Time                | 49                   | <0,001  | ****            | Yes          |
| Treatment           | 13                   | 0,002   | **              | Yes          |
| Subject             | 2,8                  | 0,148   | ns              | No           |

| ANOVA table      | SS   | DF | MS    | F (DFn, DFd)     | P value |
|------------------|------|----|-------|------------------|---------|
| Time x Treatment | 0,89 | 10 | 0,089 | F (10, 60) = 6,2 | P<0,001 |
| Time             | 2,5  | 10 | 0,25  | F (10, 60) = 17  | P<0,001 |
| Treatment        | 0,67 | 1  | 0,67  | F (1, 6) = 28    | P=0,002 |
| Subject          | 0,14 | 6  | 0,024 | F (6, 60) = 1,7  | P=0,148 |
| Residual         | 0,86 | 60 | 0,014 |                  |         |

Difference between column means  
 Mean of Depleted carr TFAM+/- MN      0,11  
 Mean of Depleted carr WT-MN      0,29  
 Difference between means      -0,17  
 SE of difference      0,033  
 95% CI of difference      -0,25 to -0,094

Data summary  
 Number of columns (Treatment)      2  
 Number of rows (Time)      11  
 Number of subjects (Subject)      8  
 Number of missing values      0

Compare each cell mean with the other cell mean in that row

Number of families      1  
 Number of comparisons per family      11  
 Alpha      0,05

| Sidak's multiple comparisons test              | Mean Diff, | 95,00% CI of diff, | Significant? | Summary | Adjusted P Value |
|------------------------------------------------|------------|--------------------|--------------|---------|------------------|
| Depleted carr TFAM+/- MN - Depleted carr WT-MN |            |                    |              |         |                  |
| 0                                              | -0,029     | -0,28 to 0,23      | No           | ns      | >0,999           |
| 2                                              | -0,003     | -0,26 to 0,25      | No           | ns      | >0,999           |
| 4                                              | 0,0077     | -0,25 to 0,26      | No           | ns      | >0,999           |
| 6                                              | -0,0092    | -0,26 to 0,25      | No           | ns      | >0,999           |
| 6,05                                           | 0,0071     | -0,25 to 0,26      | No           | ns      | >0,999           |
| 6,15                                           | -0,0079    | -0,26 to 0,25      | No           | ns      | >0,999           |
| 6,7                                            | -0,15      | -0,41 to 0,10      | No           | ns      | 0,628            |
| 7                                              | -0,4       | -0,66 to -0,15     | Yes          | ***     | <0,001           |
| 8                                              | -0,49      | -0,74 to -0,23     | Yes          | ****    | <0,001           |
| 9                                              | -0,46      | -0,71 to -0,20     | Yes          | ****    | <0,001           |
| 10                                             | -0,38      | -0,63 to -0,12     | Yes          | ***     | <0,001           |

| Test details                                   | Mean 1 | Mean 2 | Mean Diff, | SE of diff, | N1 | N2 | t     | DF |
|------------------------------------------------|--------|--------|------------|-------------|----|----|-------|----|
| Depleted carr TFAM+/- MN - Depleted carr WT-MN |        |        |            |             |    |    |       |    |
| 0                                              | 0,57   | 0,6    | -0,029     | 0,087       | 4  | 4  | 0,34  | 66 |
| 2                                              | 0,043  | 0,046  | -0,003     | 0,087       | 4  | 4  | 0,034 | 66 |
| 4                                              | 0,05   | 0,042  | 0,0077     | 0,087       | 4  | 4  | 0,089 | 66 |
| 6                                              | 0,046  | 0,055  | -0,0092    | 0,087       | 4  | 4  | 0,11  | 66 |
| 6,05                                           | 0,064  | 0,057  | 0,0071     | 0,087       | 4  | 4  | 0,081 | 66 |
| 6,15                                           | 0,056  | 0,064  | -0,0079    | 0,087       | 4  | 4  | 0,091 | 66 |
| 6,7                                            | 0,071  | 0,22   | -0,15      | 0,087       | 4  | 4  | 1,7   | 66 |
| 7                                              | 0,079  | 0,48   | -0,4       | 0,087       | 4  | 4  | 4,6   | 66 |
| 8                                              | 0,1    | 0,59   | -0,49      | 0,087       | 4  | 4  | 5,6   | 66 |
| 9                                              | 0,095  | 0,55   | -0,46      | 0,087       | 4  | 4  | 5,3   | 66 |
| 10                                             | 0,086  | 0,47   | -0,38      | 0,087       | 4  | 4  | 4,4   | 66 |

Sup. Fig8B

Two-way RM ANOVA

Matching: Stacked

Assume sphericity?

Yes

Alpha

0,05

Source of Variation

% of total variat

P value P value summa Significant?

Time x Treatment

17 <0,001

\*\*\*\* Yes

Time

49 <0,001

\*\*\*\* Yes

Treatment

15 <0,001

\*\*\* Yes

Subject

1,8 0,37

ns No

ANOVA table

SS DF MS

F (DFn, DFd) P value

Time x Treatment

62 10 6,2

F (10, 60) = 6,2 P<0,001

Time

176 10 18

F (10, 60) = 18 P<0,001

Treatment

53 1 53

F (1, 6) = 49 P<0,001

Subject

6,6 6 1,1

F (6, 60) = 1,1 P=0,370

Residual

60 60 1

Difference between column means

Mean of Depleted carr TFAM+/- MN

4,3

Mean of Depleted carr WT-MN

5,9

Difference between means

-1,6

SE of difference

0,22

95% CI of difference

-2,1 to -1,0

Data summary

Number of columns (Treatment)

2

Number of rows (Time)

11

Number of subjects (Subject)

8

Number of missing values

0

Compare each cell mean with the other cell mean in that row

Number of families

1

Number of comparisons per family

11

Alpha

0,05

Sidak's multiple comparisons test

Mean Diff,

95,00% CI of dif Significant?

Summary

Adjusted P Value

Depleted carr TFAM+/- MN - Depleted carr WT-MN

0

-0,32 -2,4 to 1,8

No

ns

>0,999

2

-0,054 -2,1 to 2,0

No

ns

>0,999

4

-0,48 -2,6 to 1,6

No

ns

>0,999

6

0,29 -1,8 to 2,4

No

ns

>0,999

6,05

0,54 -1,5 to 2,6

No

ns

0,999

6,15

-0,79 -2,9 to 1,3

No

ns

0,968

6,7

-1,7 -3,8 to 0,37

No

ns

0,187

7

-3,4 -5,5 to -1,3

Yes

\*\*\*

<0,001

8

-3,8 -5,9 to -1,7

Yes

\*\*\*\*

<0,001

9

-3,5 -5,6 to -1,5

Yes

\*\*\*\*

<0,001

10

-3,9 -5,9 to -1,8

Yes

\*\*\*\*

<0,001

Test details

Mean 1

Mean 2

Mean Diff,

SE of diff,

N1

N2

t

DF

Depleted carr TFAM+/- MN - Depleted carr WT-MN

0

7,5 7,9

-0,32

0,71

4

4

0,46

66

2

2,9 3

-0,054

0,71

4

4

0,076

66

4

3,6 4,1

-0,48

0,71

4

4

0,68

66

6

3,8 3,5

0,29

0,71

4

4

0,41

66

6,05

3,9 3,4

0,54

0,71

4

4

0,75

66

6,15

4,2 4,9

-0,79

0,71

4

4

1,1

66

6,7

4,2 5,9

-1,7

0,71

4

4

2,4

66

7

4,5 7,9

-3,4

0,71

4

4

4,8

66

8

4,5 8,3

-3,8

0,71

4

4

5,4

66

9

4,2 7,8

-3,5

0,71

4

4

5

66

10

4,1 7,9

-3,9

0,71

4

4

5,4

66

Sup. Fig8D

|                                   |                      |         |                 |                     |         |
|-----------------------------------|----------------------|---------|-----------------|---------------------|---------|
| Two-way RM ANOVA                  | Matching: Stacked    |         |                 |                     |         |
| Assume sphericity?                | Yes                  |         |                 |                     |         |
| Alpha                             | 0,05                 |         |                 |                     |         |
| Source of Variation               | % of total variation | P value | P value summary | Significant?        |         |
| Time x Column Factor              | 15,23                | <0,001  | ****            | Yes                 |         |
| Time                              | 12,16                | <0,001  | ****            | Yes                 |         |
| Column Factor                     | 57,77                | <0,001  | ****            | Yes                 |         |
| Subject                           | 2,486                | 0,15    | ns              | No                  |         |
| ANOVA table                       | SS                   | DF      | MS              | F (DFn, DFd)        | P value |
| Time x Column Factor              | 156                  | 21      | 7,431           | F (21, 112) = 6,576 | P<0,001 |
| Time                              | 124,6                | 7       | 17,8            | F (7, 112) = 15,75  | P<0,001 |
| Column Factor                     | 591,8                | 3       | 197,3           | F (3, 16) = 123,9   | P<0,001 |
| Subject                           | 25,47                | 16      | 1,592           | F (16, 112) = 1,409 | P=0,150 |
| Residual                          | 126,6                | 112     | 1,13            |                     |         |
| Data summary                      |                      |         |                 |                     |         |
| Number of columns (Column Factor) | 4                    |         |                 |                     |         |
| Number of rows (Time)             | 8                    |         |                 |                     |         |
| Number of subjects (Subject)      | 20                   |         |                 |                     |         |
| Number of missing values          | 0                    |         |                 |                     |         |

Within each row, compare columns (simple effects within rows)

|                                                                                        |            |                    |              |             |                  |    |         |     |
|----------------------------------------------------------------------------------------|------------|--------------------|--------------|-------------|------------------|----|---------|-----|
| Number of families                                                                     | 8          |                    |              |             |                  |    |         |     |
| Number of comparisons per family                                                       | 3          |                    |              |             |                  |    |         |     |
| Alpha                                                                                  | 0,05       |                    |              |             |                  |    |         |     |
| Dunnett's multiple comparisons test                                                    | Mean Diff. | 95,00% CI of diff. | Significant? | Summary     | Adjusted P Value |    |         |     |
| 0                                                                                      |            |                    |              |             |                  |    |         |     |
| Depleted carr inhibited iso-mito (myxo) vs. Depleted Vehicle inhibited iso-mito (myxo) | -0,04822   | -1,687 to 1,590    | No           | ns          | >0,999           |    |         |     |
| Depleted carr inhibited iso-mito (myxo) vs. Depleted carr intact iso-mito              | -0,7559    | -2,395 to 0,8828   | No           | ns          | 0,558            |    |         |     |
| Depleted carr inhibited iso-mito (myxo) vs. Depleted Vehicle intact iso-mito           | -0,1873    | -1,826 to 1,451    | No           | ns          | 0,986            |    |         |     |
| 2                                                                                      |            |                    |              |             |                  |    |         |     |
| Depleted carr inhibited iso-mito (myxo) vs. Depleted Vehicle inhibited iso-mito (myxo) | -5,422     | -7,060 to -3,783   | Yes          | ****        | <0,001           |    |         |     |
| Depleted carr inhibited iso-mito (myxo) vs. Depleted carr intact iso-mito              | -0,2597    | -1,898 to 1,379    | No           | ns          | 0,965            |    |         |     |
| Depleted carr inhibited iso-mito (myxo) vs. Depleted Vehicle intact iso-mito           | -4,824     | -6,463 to -3,185   | Yes          | ****        | <0,001           |    |         |     |
| 4                                                                                      |            |                    |              |             |                  |    |         |     |
| Depleted carr inhibited iso-mito (myxo) vs. Depleted Vehicle inhibited iso-mito (myxo) | -4,792     | -6,431 to -3,153   | Yes          | ****        | <0,001           |    |         |     |
| Depleted carr inhibited iso-mito (myxo) vs. Depleted carr intact iso-mito              | -0,3342    | -1,973 to 1,305    | No           | ns          | 0,931            |    |         |     |
| Depleted carr inhibited iso-mito (myxo) vs. Depleted Vehicle intact iso-mito           | -5,564     | -7,203 to -3,925   | Yes          | ****        | <0,001           |    |         |     |
| 6                                                                                      |            |                    |              |             |                  |    |         |     |
| Depleted carr inhibited iso-mito (myxo) vs. Depleted Vehicle inhibited iso-mito (myxo) | -4,323     | -5,961 to -2,684   | Yes          | ****        | <0,001           |    |         |     |
| Depleted carr inhibited iso-mito (myxo) vs. Depleted carr intact iso-mito              | 0,34       | -1,299 to 1,979    | No           | ns          | 0,928            |    |         |     |
| Depleted carr inhibited iso-mito (myxo) vs. Depleted Vehicle intact iso-mito           | -4,014     | -5,652 to -2,375   | Yes          | ****        | <0,001           |    |         |     |
| 6,05                                                                                   |            |                    |              |             |                  |    |         |     |
| Depleted carr inhibited iso-mito (myxo) vs. Depleted Vehicle inhibited iso-mito (myxo) | -4,543     | -6,181 to -2,904   | Yes          | ****        | <0,001           |    |         |     |
| Depleted carr inhibited iso-mito (myxo) vs. Depleted carr intact iso-mito              | 0,6167     | -1,022 to 2,255    | No           | ns          | 0,699            |    |         |     |
| Depleted carr inhibited iso-mito (myxo) vs. Depleted Vehicle intact iso-mito           | -4,107     | -5,746 to -2,468   | Yes          | ****        | <0,001           |    |         |     |
| 6,15                                                                                   |            |                    |              |             |                  |    |         |     |
| Depleted carr inhibited iso-mito (myxo) vs. Depleted Vehicle inhibited iso-mito (myxo) | -5,773     | -7,412 to -4,134   | Yes          | ****        | <0,001           |    |         |     |
| Depleted carr inhibited iso-mito (myxo) vs. Depleted carr intact iso-mito              | -1,746     | -3,385 to -0,1077  | Yes          | *           | 0,034            |    |         |     |
| Depleted carr inhibited iso-mito (myxo) vs. Depleted Vehicle intact iso-mito           | -4,992     | -6,631 to -3,353   | Yes          | ****        | <0,001           |    |         |     |
| 6,7                                                                                    |            |                    |              |             |                  |    |         |     |
| Depleted carr inhibited iso-mito (myxo) vs. Depleted Vehicle inhibited iso-mito (myxo) | -4,793     | -6,431 to -3,154   | Yes          | ****        | <0,001           |    |         |     |
| Depleted carr inhibited iso-mito (myxo) vs. Depleted carr intact iso-mito              | -4,285     | -5,923 to -2,646   | Yes          | ****        | <0,001           |    |         |     |
| Depleted carr inhibited iso-mito (myxo) vs. Depleted Vehicle intact iso-mito           | -5,633     | -7,272 to -3,994   | Yes          | ****        | <0,001           |    |         |     |
| 7                                                                                      |            |                    |              |             |                  |    |         |     |
| Depleted carr inhibited iso-mito (myxo) vs. Depleted Vehicle inhibited iso-mito (myxo) | -4,256     | -5,895 to -2,617   | Yes          | ****        | <0,001           |    |         |     |
| Depleted carr inhibited iso-mito (myxo) vs. Depleted carr intact iso-mito              | -0,8473    | -2,486 to 0,7913   | No           | ns          | 0,469            |    |         |     |
| Depleted carr inhibited iso-mito (myxo) vs. Depleted Vehicle intact iso-mito           | -4,678     | -6,316 to -3,039   | Yes          | ****        | <0,001           |    |         |     |
| Test details                                                                           | Mean 1     | Mean 2             | Mean Diff.   | SE of diff. | N1               | N2 | q       | DF  |
| 0                                                                                      |            |                    |              |             |                  |    |         |     |
| Depleted carr inhibited iso-mito (myxo) vs. Depleted Vehicle inhibited iso-mito (myxo) | 7,842      | 7,89               | -0,04822     | 0,6893      | 5                | 5  | 0,06996 | 128 |
| Depleted carr inhibited iso-mito (myxo) vs. Depleted carr intact iso-mito              | 7,842      | 8,598              | -0,7559      | 0,6893      | 5                | 5  | 1,097   | 128 |
| Depleted carr inhibited iso-mito (myxo) vs. Depleted Vehicle intact iso-mito           | 7,842      | 8,03               | -0,1873      | 0,6893      | 5                | 5  | 0,2717  | 128 |
| 2                                                                                      |            |                    |              |             |                  |    |         |     |
| Depleted carr inhibited iso-mito (myxo) vs. Depleted Vehicle inhibited iso-mito (myxo) | 2,668      | 8,09               | -5,422       | 0,6893      | 5                | 5  | 7,866   | 128 |
| Depleted carr inhibited iso-mito (myxo) vs. Depleted carr intact iso-mito              | 2,668      | 2,928              | -0,2597      | 0,6893      | 5                | 5  | 0,3767  | 128 |
| Depleted carr inhibited iso-mito (myxo) vs. Depleted Vehicle intact iso-mito           | 2,668      | 7,492              | -4,824       | 0,6893      | 5                | 5  | 6,999   | 128 |
| 4                                                                                      |            |                    |              |             |                  |    |         |     |
| Depleted carr inhibited iso-mito (myxo) vs. Depleted Vehicle inhibited iso-mito (myxo) | 2,993      | 7,785              | -4,792       | 0,6893      | 5                | 5  | 6,952   | 128 |
| Depleted carr inhibited iso-mito (myxo) vs. Depleted carr intact iso-mito              | 2,993      | 3,327              | -0,3342      | 0,6893      | 5                | 5  | 0,4848  | 128 |
| Depleted carr inhibited iso-mito (myxo) vs. Depleted Vehicle intact iso-mito           | 2,993      | 8,557              | -5,564       | 0,6893      | 5                | 5  | 8,072   | 128 |
| 6                                                                                      |            |                    |              |             |                  |    |         |     |
| Depleted carr inhibited iso-mito (myxo) vs. Depleted Vehicle inhibited iso-mito (myxo) | 3,541      | 7,863              | -4,323       | 0,6893      | 5                | 5  | 6,271   | 128 |
| Depleted carr inhibited iso-mito (myxo) vs. Depleted carr intact iso-mito              | 3,541      | 3,201              | 0,34         | 0,6893      | 5                | 5  | 0,4933  | 128 |
| Depleted carr inhibited iso-mito (myxo) vs. Depleted Vehicle intact iso-mito           | 3,541      | 7,554              | -4,014       | 0,6893      | 5                | 5  | 5,823   | 128 |
| 6,05                                                                                   |            |                    |              |             |                  |    |         |     |
| Depleted carr inhibited iso-mito (myxo) vs. Depleted Vehicle inhibited iso-mito (myxo) | 3,419      | 7,962              | -4,543       | 0,6893      | 5                | 5  | 6,59    | 128 |
| Depleted carr inhibited iso-mito (myxo) vs. Depleted carr intact iso-mito              | 3,419      | 2,803              | 0,6167       | 0,6893      | 5                | 5  | 0,8947  | 128 |
| Depleted carr inhibited iso-mito (myxo) vs. Depleted Vehicle intact iso-mito           | 3,419      | 7,527              | -4,107       | 0,6893      | 5                | 5  | 5,959   | 128 |
| 6,15                                                                                   |            |                    |              |             |                  |    |         |     |
| Depleted carr inhibited iso-mito (myxo) vs. Depleted Vehicle inhibited iso-mito (myxo) | 3,148      | 8,922              | -5,773       | 0,6893      | 5                | 5  | 8,376   | 128 |
| Depleted carr inhibited iso-mito (myxo) vs. Depleted carr intact iso-mito              | 3,148      | 4,895              | -1,746       | 0,6893      | 5                | 5  | 2,534   | 128 |
| Depleted carr inhibited iso-mito (myxo) vs. Depleted Vehicle intact iso-mito           | 3,148      | 8,14               | -4,992       | 0,6893      | 5                | 5  | 7,242   | 128 |
| 6,7                                                                                    |            |                    |              |             |                  |    |         |     |
| Depleted carr inhibited iso-mito (myxo) vs. Depleted Vehicle inhibited iso-mito (myxo) | 3,242      | 8,034              | -4,793       | 0,6893      | 5                | 5  | 6,953   | 128 |
| Depleted carr inhibited iso-mito (myxo) vs. Depleted carr intact iso-mito              | 3,242      | 7,526              | -4,285       | 0,6893      | 5                | 5  | 6,216   | 128 |
| Depleted carr inhibited iso-mito (myxo) vs. Depleted Vehicle intact iso-mito           | 3,242      | 8,875              | -5,633       | 0,6893      | 5                | 5  | 8,173   | 128 |
| 7                                                                                      |            |                    |              |             |                  |    |         |     |
| Depleted carr inhibited iso-mito (myxo) vs. Depleted Vehicle inhibited iso-mito (myxo) | 3,711      | 7,967              | -4,256       | 0,6893      | 5                | 5  | 6,174   | 128 |
| Depleted carr inhibited iso-mito (myxo) vs. Depleted carr intact iso-mito              | 3,711      | 4,558              | -0,8473      | 0,6893      | 5                | 5  | 1,229   | 128 |
| Depleted carr inhibited iso-mito (myxo) vs. Depleted Vehicle intact iso-mito           | 3,711      | 8,388              | -4,678       | 0,6893      | 5                | 5  | 6,786   | 128 |

Sup Fig9A

Two-way RM ANOVA Matching: Stacked  
 Assume sphericity? Yes  
 Alpha 0.05

| Source of Variation | % of total variation | P value | P value summary | Significant? |
|---------------------|----------------------|---------|-----------------|--------------|
| Time x Treatment    | 15.35                | <0.0001 | ****            | Yes          |
| Time                | 50.94                | <0.0001 | ****            | Yes          |
| Treatment           | 22.99                | <0.0001 | ****            | Yes          |
| Subject             | 2.704                | 0.0289  | *               | Yes          |

| ANOVA table      | SS    | DF | MS     | F (DFn, DFd)      | P value  |
|------------------|-------|----|--------|-------------------|----------|
| Time x Treatment | 42.56 | 7  | 6.08   | F (7, 56) = 15.32 | P<0.0001 |
| Time             | 141.2 | 7  | 20.18  | F (7, 56) = 50.86 | P<0.0001 |
| Treatment        | 63.74 | 1  | 63.74  | F (1, 8) = 68.03  | P<0.0001 |
| Subject          | 7.496 | 8  | 0.937  | F (8, 56) = 2.382 | P=0.0289 |
| Residual         | 22.22 | 56 | 0.3967 |                   |          |

Difference between column means  
 Mean of WT 6.471  
 Mean of CD200R KO 4.686  
 Difference between means 1.785  
 SE of difference 0.2164  
 95% CI of difference 1.286 to 2.284

Data summary  
 Number of columns (Treatment) 2  
 Number of rows (Time) 8  
 Number of subjects (Subject) 10  
 Number of missing values 0

Compare each cell mean with the other cell mean in that row

Number of families 1  
 Number of comparisons per family 8  
 Alpha 0.05

| Sidak's multiple comparisons test | Mean Diff. | 95.00% CI of diff. | Significant? | Summary | Adjusted P Value |
|-----------------------------------|------------|--------------------|--------------|---------|------------------|
| WT - CD200R KO                    |            |                    |              |         |                  |
| 0                                 | 0.3606     | -0.8545 to 1.576   | No           | ns      | 0.8845           |
| 1                                 | -0.04215   | -1.257 to 1.173    | No           | ns      | >0.9999          |
| 2                                 | -0.2478    | -1.463 to 0.9673   | No           | ns      | 0.9988           |
| 3                                 | 1.606      | 0.3813 to 2.821    | Yes          | **      | 0.0033           |
| 4                                 | 3.115      | 1.900 to 4.330     | Yes          | ****    | <0.0001          |
| 6                                 | 3.13       | 1.915 to 4.345     | Yes          | ****    | <0.0001          |
| 8                                 | 3.073      | 1.858 to 4.288     | Yes          | ****    | <0.0001          |
| 15                                | 3.286      | 2.071 to 4.501     | Yes          | ****    | <0.0001          |

| Test details   | Mean 1 | Mean 2 | Mean Diff. | SE of diff. | N1 | N2 | t      | DF |
|----------------|--------|--------|------------|-------------|----|----|--------|----|
| WT - CD200R KO |        |        |            |             |    |    |        |    |
| 0              | 7.667  | 7.326  | 0.3606     | 0.4309      | 5  | 5  | 0.8369 | 64 |
| 1              | 3.758  | 3.8    | -0.04215   | 0.4309      | 5  | 5  | 0.9781 | 64 |
| 2              | 3.408  | 3.656  | -0.2478    | 0.4309      | 5  | 5  | 0.5749 | 64 |
| 3              | 5.493  | 3.887  | 1.606      | 0.4309      | 5  | 5  | 3.728  | 64 |
| 4              | 7.5    | 4.384  | 3.115      | 0.4309      | 5  | 5  | 7.229  | 64 |
| 6              | 7.738  | 4.608  | 3.13       | 0.4309      | 5  | 5  | 7.264  | 64 |
| 8              | 7.889  | 4.816  | 3.073      | 0.4309      | 5  | 5  | 7.131  | 64 |
| 15             | 8.238  | 4.952  | 3.286      | 0.4309      | 5  | 5  | 7.625  | 64 |

## Sup Fig9B

|                                        |                             |
|----------------------------------------|-----------------------------|
| Column B                               | <i>Cd200r<sup>-/-</sup></i> |
| vs.                                    | vs,                         |
| Column A                               | WT                          |
| Unpaired t test                        |                             |
| P value                                | 0,0206                      |
| P value summary                        | *                           |
| Significantly different (P < 0.05)?    | Yes                         |
| One- or two-tailed P value?            | Two-tailed                  |
| t, df                                  | t=2,746, df=10              |
| How big is the difference?             |                             |
| Mean of column A                       | -54,17                      |
| Mean of column B                       | 303,4                       |
| Difference between means (B - A) ± SEM | 357,5 ± 130,2               |
| 95% confidence interval                | 67,41 to 647,6              |
| R squared (eta squared)                | 0,4299                      |
| F test to compare variances            |                             |
| F, DFn, Dfd                            | 1,078, 5, 5                 |
| P value                                | 0,936                       |
| P value summary                        | ns                          |
| Significantly different (P < 0.05)?    | No                          |
| Data analyzed                          |                             |
| Sample size, column A                  | 6                           |
| Sample size, column B                  | 6                           |

### Sup Fig. 9C

|                                        |                             |
|----------------------------------------|-----------------------------|
| Column B                               | <i>Cd200r<sup>-/-</sup></i> |
| vs.                                    | vs,                         |
| Column A                               | WT                          |
| Unpaired t test                        |                             |
| P value                                | 0,5954                      |
| P value summary                        | ns                          |
| Significantly different (P < 0.05)?    | No                          |
| One- or two-tailed P value?            | Two-tailed                  |
| t, df                                  | t=0,5412, df=17             |
| How big is the difference?             |                             |
| Mean of column A                       | 28,67                       |
| Mean of column B                       | 98,77                       |
| Difference between means (B - A) ± SEM | 70,10 ± 129,5               |
| 95% confidence interval                | -203,2 to 343,4             |
| R squared (eta squared)                | 0,01694                     |
| F test to compare variances            |                             |
| F, DFn, Dfd                            | 1,204, 9, 8                 |
| P value                                | 0,8039                      |
| P value summary                        | ns                          |
| Significantly different (P < 0.05)?    | No                          |
| Data analyzed                          |                             |
| Sample size, column A                  | 9                           |
| Sample size, column B                  | 10                          |



Sup. Fig 9D

| Two-way ANOVA                      |                      | Ordinary      |                 |                    |              |         |
|------------------------------------|----------------------|---------------|-----------------|--------------------|--------------|---------|
| Alpha                              |                      | 0.05          |                 |                    |              |         |
| Source of Variation                | % of total variation | P value       | P value summary | Significant?       |              |         |
| Interaction                        | 7.14                 | 0.296         | ns              | No                 |              |         |
| Time                               | 2.035                | 0.7           | ns              | No                 |              |         |
| Genotype                           | 1.335                | 0.496         | ns              | No                 |              |         |
| ANOVA table                        |                      | SS (Type III) | DF              | MS                 | F (DF1, DF2) | P value |
| Interaction                        | 0.03595              | 2             | 0.01798         | F (2, 32) = 1.266  |              | P=0.296 |
| Time                               | 0.01025              | 2             | 0.005123        | F (2, 32) = 0.3608 |              | P=0.700 |
| Genotype                           | 0.006723             | 1             | 0.006723        | F (1, 32) = 0.4735 |              | P=0.496 |
| Residual                           | 0.4543               | 32            | 0.0142          |                    |              |         |
| Difference between column means    |                      |               |                 |                    |              |         |
| Predicted (LS) mean of WT          | 1.653                |               |                 |                    |              |         |
| Predicted (LS) mean of CD200R-/-   | 1.681                |               |                 |                    |              |         |
| Difference between predicted means | -0.02815             |               |                 |                    |              |         |
| SE of difference                   | 0.04091              |               |                 |                    |              |         |
| 95% CI of difference               | -0.1115 to 0.05518   |               |                 |                    |              |         |
| Data summary                       |                      |               |                 |                    |              |         |
| Number of columns (Genotype)       | 2                    |               |                 |                    |              |         |
| Number of rows (Time)              | 3                    |               |                 |                    |              |         |
| Number of values                   | 38                   |               |                 |                    |              |         |

Compare each cell mean with the other cell mean in that row

| Number of families                |                           | 1                  |              |         |                  |
|-----------------------------------|---------------------------|--------------------|--------------|---------|------------------|
| Number of comparisons per family  |                           | 3                  |              |         |                  |
| Alpha                             |                           | 0.05               |              |         |                  |
| Sidak's multiple comparisons test | Predicted (LS) mean diff. | 95.00% CI of diff. | Significant? | Summary | Adjusted P Value |
| WT - CD200R-/-                    |                           |                    |              |         |                  |
| 0                                 | 0.05309                   | -0.08483 to 0.1910 | No           | ns      | 0.712            |
| 1                                 | -0.08615                  | -0.2375 to 0.1152  | No           | ns      | 0.641            |
| 7                                 | -0.0514                   | -0.2412 to 0.1384  | No           | ns      | 0.875            |

| Test details   | Predicted (LS) mean 1 | Predicted (LS) mean 2 | Predicted (LS) mean diff. | SE of diff. | N1 | N2 | t      | DF |
|----------------|-----------------------|-----------------------|---------------------------|-------------|----|----|--------|----|
| WT - CD200R-/- |                       |                       |                           |             |    |    |        |    |
| 0              | 1.692                 | 1.639                 | 0.05309                   | 0.05475     | 9  | 10 | 0.9697 | 32 |
| 1              | 1.648                 | 1.734                 | -0.08615                  | 0.07993     | 4  | 5  | 1.078  | 32 |
| 7              | 1.619                 | 1.67                  | -0.0514                   | 0.07536     | 5  | 5  | 0.6821 | 32 |

Sup. Fig9E-L1

Two-way ANOVA Ordinary  
Alpha 0,05

| Source of Variation | % of total variation | P value | P value summary | Significant? |
|---------------------|----------------------|---------|-----------------|--------------|
| Interaction         | 0,04011              | 0,9843  | ns              | No           |
| Row Factor          | 56,91                | <0,0001 | ****            | Yes          |
| Genotype            | 0,05265              | 0,8395  | ns              | No           |

| ANOVA table | SS (Type III) | DF | MS      | F (DFn, DFd)        | P value  |
|-------------|---------------|----|---------|---------------------|----------|
| Interaction | 0,0773        | 2  | 0,03865 | F (2, 34) = 0,01587 | P=0,9843 |
| Row Factor  | 109,7         | 2  | 54,84   | F (2, 34) = 22,52   | P<0,0001 |
| Genotype    | 0,1015        | 1  | 0,1015  | F (1, 34) = 0,04167 | P=0,8395 |
| Residual    | 82,8          | 34 | 2,435   |                     |          |

Difference between column means  
 Predicted (LS) mean of WT 1,629  
 Predicted (LS) mean of KO 1,736  
 Difference between predicted means -0,1062  
 SE of difference 0,5202  
 95% CI of difference -1,163 to 0,9509

Data summary  
 Number of columns (Genotype) 2  
 Number of rows (Row Factor) 3  
 Number of values 40

Compare each cell mean with the other cell mean in that row

Number of families 1  
 Number of comparisons per family 3  
 Alpha 0,05

| Bonferroni's multiple comparisons test | Predicted (LS) mean | 95,00% CI of diff, | Significant? | Summary | Adjusted P Value |
|----------------------------------------|---------------------|--------------------|--------------|---------|------------------|
| WT - KO                                |                     |                    |              |         |                  |
| 0                                      | -0,1895             | -1,947 to 1,568    | No           | ns      | >0,9999          |
| 1                                      | 0,02293             | -2,462 to 2,508    | No           | ns      | >0,9999          |
| 7                                      | -0,1519             | -2,637 to 2,333    | No           | ns      | >0,9999          |

| Test details | Predicted (LS) mean | Predicted (LS) mean | Predicted (LS) mean | SE of diff, | N1 | N2 | t       | DF |
|--------------|---------------------|---------------------|---------------------|-------------|----|----|---------|----|
| WT - KO      |                     |                     |                     |             |    |    |         |    |
| 0            | 0,5306              | 0,7201              | -0,1895             | 0,6979      | 10 | 10 | 0,2716  | 34 |
| 1            | 4,278               | 4,255               | 0,02293             | 0,9869      | 5  | 5  | 0,02323 | 34 |
| 7            | 0,07909             | 0,231               | -0,1519             | 0,9869      | 5  | 5  | 0,1539  | 34 |

Sup. Fig9E-IL6

| Two-way ANOVA                      |                      | Ordinary      |                 |              |                   |          |
|------------------------------------|----------------------|---------------|-----------------|--------------|-------------------|----------|
| Alpha                              |                      | 0.05          |                 |              |                   |          |
| Source of Variation                | % of total variation | P value       | P value summary | Significant? |                   |          |
| Interaction                        | 2.808                | 0.312         | ns              | No           |                   |          |
| Row Factor                         | 56.42                | <0.0001       | ****            | Yes          |                   |          |
| Genotype                           | 1.907                | 0.2093        | ns              | No           |                   |          |
| ANOVA table                        |                      | SS (Type III) | DF              | MS           | F (DFn, DFd)      | P value  |
| Interaction                        |                      | 10.06         | 2               | 5.031        | F (2, 34) = 1.206 | P=0.3120 |
| Row Factor                         |                      | 202.2         | 2               | 101.1        | F (2, 34) = 24.23 | P<0.0001 |
| Genotype                           |                      | 6.834         | 1               | 6.834        | F (1, 34) = 1.637 | P=0.2093 |
| Residual                           |                      | 141.9         | 34              | 4.174        |                   |          |
| Difference between column means    |                      |               |                 |              |                   |          |
| Predicted (LS) mean of WT          | 2.442                |               |                 |              |                   |          |
| Predicted (LS) mean of KO          | 1.57                 |               |                 |              |                   |          |
| Difference between predicted means | 0.8714               |               |                 |              |                   |          |
| SE of difference                   | 0.681                |               |                 |              |                   |          |
| 95% CI of difference               | -0.5125 to 2.255     |               |                 |              |                   |          |
| Data summary                       |                      |               |                 |              |                   |          |
| Number of columns (Genotype)       | 2                    |               |                 |              |                   |          |
| Number of rows (Row Factor)        | 3                    |               |                 |              |                   |          |
| Number of values                   | 40                   |               |                 |              |                   |          |

Compare each cell mean with the other cell mean in that row

|                                        |                           |                    |              |         |                  |
|----------------------------------------|---------------------------|--------------------|--------------|---------|------------------|
| Number of families                     | 1                         |                    |              |         |                  |
| Number of comparisons per family       | 3                         |                    |              |         |                  |
| Alpha                                  | 0.05                      |                    |              |         |                  |
| Bonferroni's multiple comparisons test | Predicted (LS) mean diff. | 95.00% CI of diff. | Significant? | Summary | Adjusted P Value |
| WT - KO                                |                           |                    |              |         |                  |
| 0                                      | -0.009374                 | -2.310 to 2.291    | No           | ns      | >0.9999          |
| 1                                      | 2.379                     | -0.8743 to 5.633   | No           | ns      | 0.2229           |
| 7                                      | 0.2441                    | -3.010 to 3.498    | No           | ns      | >0.9999          |

| Test details | Predicted (LS) mean 1 | Predicted (LS) mean 2 | Predicted (LS) mean diff. | SE of diff. | N1 | N2 | t       | DF |
|--------------|-----------------------|-----------------------|---------------------------|-------------|----|----|---------|----|
| WT - KO      |                       |                       |                           |             |    |    |         |    |
| 0            | 0.2299                | 0.2393                | -0.009374                 | 0.9136      | 10 | 10 | 0.01026 | 34 |
| 1            | 6.647                 | 4.267                 | 2.379                     | 1.292       | 5  | 5  | 1.842   | 34 |
| 7            | 0.4483                | 0.2042                | 0.2441                    | 1.292       | 5  | 5  | 0.189   | 34 |

Sup. Fig9F

Assume sphericity? Yes  
Alpha 0,05

| Source of Variation | % of total variation | P value | P value summary | Significant? |
|---------------------|----------------------|---------|-----------------|--------------|
| Time x Treatment    | 7,353                | 0,002   | **              | Yes          |
| Time                | 68,66                | <0,0001 | ****            | Yes          |
| Treatment           | 0,7933               | 0,1387  | ns              | No           |
| Subject             | 3,064                | 0,4     | ns              | No           |

| ANOVA table      | SS      | DF | MS       | F (DFn, DFd)       | P value  |
|------------------|---------|----|----------|--------------------|----------|
| Time x Treatment | 0,1934  | 7  | 0,02762  | F (7, 70) = 3,853  | P=0,0020 |
| Time             | 1,806   | 7  | 0,2579   | F (7, 70) = 34,12  | P<0,0001 |
| Treatment        | 0,02086 | 1  | 0,02086  | F (1, 10) = 2,589  | P=0,1387 |
| Subject          | 0,08058 | 10 | 0,008058 | F (10, 70) = 1,066 | P=0,4000 |
| Residual         | 0,5293  | 70 | 0,007561 |                    |          |

Difference between column means  
Mean of CD200R KO -> WT 0,1478  
Mean of CD200R KO -> CD200R KO 0,1183  
Difference between means 0,02948  
SE of difference 0,01832  
95% CI of difference -0,01134 to 0,07031

Data summary  
Number of columns (Treatment) 2  
Number of rows (Time) 8  
Number of subjects (Subject) 12  
Number of missing values 0

Compare each cell mean with the other cell mean in that row

Number of families 1  
Number of comparisons per family 8  
Alpha 0,05

| Sidak's multiple comparisons test        | Mean Diff, | 95,00% CI of diff, | Significant? | Summary | Adjusted P Value |
|------------------------------------------|------------|--------------------|--------------|---------|------------------|
| CD200R KO -> WT - CD200R KO -> CD200R KO |            |                    |              |         |                  |
| 0                                        | -0,09018   | -0,2314 to 0,05100 | No           | ns      | 0,475            |
| 2                                        | 0,008762   | -0,1324 to 0,1499  | No           | ns      | >0,9999          |
| 4                                        | -0,05919   | -0,2004 to 0,08199 | No           | ns      | 0,893            |
| 6                                        | 0,003927   | -0,1373 to 0,1451  | No           | ns      | >0,9999          |
| 6,05                                     | 0,03011    | -0,1111 to 0,1713  | No           | ns      | 0,9984           |
| 6,15                                     | 0,1202     | -0,02102 to 0,2613 | No           | ns      | 0,1458           |
| 6,7                                      | 0,2102     | 0,06903 to 0,3514  | Yes          | ***     | 0,0006           |
| 7                                        | 0,01207    | -0,1291 to 0,1533  | No           | ns      | >0,9999          |

| Test details                             | Mean 1  | Mean 2  | Mean Diff, | SE of diff, | N1 | N2 | t       | DF |
|------------------------------------------|---------|---------|------------|-------------|----|----|---------|----|
| CD200R KO -> WT - CD200R KO -> CD200R KO |         |         |            |             |    |    |         |    |
| 0                                        | 0,4382  | 0,5283  | -0,09018   | 0,05041     | 6  | 6  | 1,789   | 80 |
| 2                                        | 0,04821 | 0,03945 | 0,008762   | 0,05041     | 6  | 6  | 0,1738  | 80 |
| 4                                        | 0,04229 | 0,1015  | -0,05919   | 0,05041     | 6  | 6  | 1,174   | 80 |
| 6                                        | 0,06855 | 0,06462 | 0,003927   | 0,05041     | 6  | 6  | 0,07789 | 80 |
| 6,05                                     | 0,0972  | 0,06709 | 0,03011    | 0,05041     | 6  | 6  | 0,5973  | 80 |
| 6,15                                     | 0,1716  | 0,0514  | 0,1202     | 0,05041     | 6  | 6  | 2,384   | 80 |
| 6,7                                      | 0,2661  | 0,05584 | 0,2102     | 0,05041     | 6  | 6  | 4,17    | 80 |
| 7                                        | 0,05033 | 0,03825 | 0,01207    | 0,05041     | 6  | 6  | 0,2395  | 80 |

Sup. Fig9G

Two-way RM ANOVA      Matching: Stacked  
 Assume sphericity?      Yes  
 Alpha                      0,05

| Source of Variation | % of total variation | P value | P value summary | Significant? |
|---------------------|----------------------|---------|-----------------|--------------|
| Time x Treatment    | 18,53                | <0,0001 | ****            | Yes          |
| Time                | 46,37                | <0,0001 | ****            | Yes          |
| Treatment           | 11,93                | 0,0018  | **              | Yes          |
| Subject             | 2,539                | 0,3032  | ns              | No           |

| ANOVA table      | SS     | DF | MS      | F (DFn, DFd)       | P value  |
|------------------|--------|----|---------|--------------------|----------|
| Time x Treatment | 0,7309 | 10 | 0,07309 | F (10, 60) = 5,392 | P<0,0001 |
| Time             | 1,829  | 10 | 0,1829  | F (10, 60) = 13,49 | P<0,0001 |
| Treatment        | 0,4707 | 1  | 0,4707  | F (1, 6) = 28,20   | P=0,0018 |
| Subject          | 0,1001 | 6  | 0,01669 | F (6, 60) = 1,231  | P=0,3032 |
| Residual         | 0,8133 | 60 | 0,01356 |                    |          |

Difference between column means  
 Mean of Depleted carr WT mono      0,2594  
 Mean of Depleted carr CD200R-/- mono      0,1131  
 Difference between means      0,1463  
 SE of difference      0,02754  
 95% CI of difference      0,07887 to 0,2137

Data summary  
 Number of columns (Treatment)      2  
 Number of rows (Time)      11  
 Number of subjects (Subject)      8  
 Number of missing values      0

Compare each cell mean with the other cell mean in that row

Number of families      1  
 Number of comparisons per family      11  
 Alpha      0,05

| Sidak's multiple comparisons test                    | Mean Diff, | 95,00% CI of diff, | Significant? | Summary | Adjusted P Value |
|------------------------------------------------------|------------|--------------------|--------------|---------|------------------|
| Depleted carr WT mono - Depleted carr CD200R-/- mono |            |                    |              |         |                  |
| 0                                                    | -0,03577   | -0,2795 to 0,2080  | No           | ns      | >0,9999          |
| 2                                                    | -0,008102  | -0,2518 to 0,2356  | No           | ns      | >0,9999          |
| 4                                                    | -0,001291  | -0,2450 to 0,2424  | No           | ns      | >0,9999          |
| 6                                                    | 0,01416    | -0,2296 to 0,2579  | No           | ns      | >0,9999          |
| 6,05                                                 | -0,01015   | -0,2539 to 0,2336  | No           | ns      | >0,9999          |
| 6,15                                                 | 0,02787    | -0,2159 to 0,2716  | No           | ns      | >0,9999          |
| 6,7                                                  | 0,09732    | -0,1464 to 0,3411  | No           | ns      | 0,9554           |
| 7                                                    | 0,4306     | 0,1868 to 0,6743   | Yes          | ****    | <0,0001          |
| 8                                                    | 0,4167     | 0,1730 to 0,6604   | Yes          | ****    | <0,0001          |
| 9                                                    | 0,3277     | 0,08398 to 0,5714  | Yes          | **      | 0,0022           |
| 10                                                   | 0,3499     | 0,1062 to 0,5936   | Yes          | ***     | 0,0009           |

| Test details                                         | Mean 1  | Mean 2  | Mean Diff, | SE of diff, | N1 | N2 | t       | DF |
|------------------------------------------------------|---------|---------|------------|-------------|----|----|---------|----|
| Depleted carr WT mono - Depleted carr CD200R-/- mono |         |         |            |             |    |    |         |    |
| 0                                                    | 0,5059  | 0,5416  | -0,03577   | 0,08319     | 4  | 4  | 0,43    | 66 |
| 2                                                    | 0,03072 | 0,03882 | -0,008102  | 0,08319     | 4  | 4  | 0,09739 | 66 |
| 4                                                    | 0,04101 | 0,0423  | -0,001291  | 0,08319     | 4  | 4  | 0,01552 | 66 |
| 6                                                    | 0,07896 | 0,0648  | 0,01416    | 0,08319     | 4  | 4  | 0,1702  | 66 |
| 6,05                                                 | 0,06873 | 0,07888 | -0,01015   | 0,08319     | 4  | 4  | 0,122   | 66 |
| 6,15                                                 | 0,09458 | 0,06671 | 0,02787    | 0,08319     | 4  | 4  | 0,335   | 66 |
| 6,7                                                  | 0,1794  | 0,0821  | 0,09732    | 0,08319     | 4  | 4  | 1,17    | 66 |
| 7                                                    | 0,5094  | 0,07887 | 0,4306     | 0,08319     | 4  | 4  | 5,176   | 66 |
| 8                                                    | 0,4714  | 0,0547  | 0,4167     | 0,08319     | 4  | 4  | 5,009   | 66 |
| 9                                                    | 0,442   | 0,1143  | 0,3277     | 0,08319     | 4  | 4  | 3,939   | 66 |
| 10                                                   | 0,4313  | 0,08137 | 0,3499     | 0,08319     | 4  | 4  | 4,206   | 66 |

Sup. Fig9H

Two-way RM ANOVA                      Matching: Stacked  
 Assume sphericity?                    Yes  
 Alpha                                        0,05

| Source of Variation | % of total variation | P value | P value summary | Significant? |
|---------------------|----------------------|---------|-----------------|--------------|
| Time x Treatment    | 18,51                | <0,0001 | ****            | Yes          |
| Time                | 50,44                | <0,0001 | ****            | Yes          |
| Treatment           | 15,4                 | 0,0002  | ***             | Yes          |
| Subject             | 1,38                 | 0,4555  | ns              | No           |

| ANOVA table      | SS    | DF | MS     | F (DFn, DFd)       | P value  |
|------------------|-------|----|--------|--------------------|----------|
| Time x Treatment | 79,77 | 10 | 7,977  | F (10, 60) = 7,780 | P<0,0001 |
| Time             | 217,4 | 10 | 21,74  | F (10, 60) = 21,20 | P<0,0001 |
| Treatment        | 66,4  | 1  | 66,4   | F (1, 6) = 66,98   | P=0,0002 |
| Subject          | 5,948 | 6  | 0,9913 | F (6, 60) = 0,9668 | P=0,4555 |
| Residual         | 61,52 | 60 | 1,025  |                    |          |

Difference between column means  
 Mean of Depleted carr WT mono                      6,274  
 Mean of Depleted carr CD200R-/- mono              4,537  
 Difference between means                              1,737  
 SE of difference                                            0,2123  
 95% CI of difference                                    1,218 to 2,257

Data summary  
 Number of columns (Treatment)                    2  
 Number of rows (Time)                                11  
 Number of subjects (Subject)                        8  
 Number of missing values                            0

Compare each cell mean with the other cell mean in that row

Number of families                                      1  
 Number of comparisons per family                  11  
 Alpha                                                        0,05

| Sidak's multiple comparisons test                    | Mean Diff, | 95,00% CI of diff, | Significant? | Summary | Adjusted P Value |
|------------------------------------------------------|------------|--------------------|--------------|---------|------------------|
| Depleted carr WT mono - Depleted carr CD200R-/- mono |            |                    |              |         |                  |
| 0                                                    | 0,9018     | -1,193 to 2,996    | No           | ns      | 0,9269           |
| 2                                                    | -0,7854    | -2,880 to 1,309    | No           | ns      | 0,9713           |
| 4                                                    | 0,1512     | -1,943 to 2,246    | No           | ns      | >0,9999          |
| 6                                                    | -0,01875   | -2,113 to 2,076    | No           | ns      | >0,9999          |
| 6,05                                                 | -0,2021    | -2,297 to 1,893    | No           | ns      | >0,9999          |
| 6,15                                                 | 0,2277     | -1,867 to 2,322    | No           | ns      | >0,9999          |
| 6,7                                                  | 3,634      | 1,539 to 5,728     | Yes          | ****    | <0,0001          |
| 7                                                    | 3,596      | 1,501 to 5,690     | Yes          | ****    | <0,0001          |
| 8                                                    | 3,978      | 1,883 to 6,072     | Yes          | ****    | <0,0001          |
| 9                                                    | 3,322      | 1,227 to 5,417     | Yes          | ***     | 0,0002           |
| 10                                                   | 4,307      | 2,212 to 6,401     | Yes          | ****    | <0,0001          |

| Test details                                         | Mean 1 | Mean 2 | Mean Diff, | SE of diff, | N1 | N2 | t       | DF |
|------------------------------------------------------|--------|--------|------------|-------------|----|----|---------|----|
| Depleted carr WT mono - Depleted carr CD200R-/- mono |        |        |            |             |    |    |         |    |
| 0                                                    | 8,257  | 7,355  | 0,9018     | 0,7149      | 4  | 4  | 1,261   | 66 |
| 2                                                    | 2,423  | 3,208  | -0,7854    | 0,7149      | 4  | 4  | 1,099   | 66 |
| 4                                                    | 3,677  | 3,525  | 0,1512     | 0,7149      | 4  | 4  | 0,2116  | 66 |
| 6                                                    | 3,773  | 3,792  | -0,01875   | 0,7149      | 4  | 4  | 0,02623 | 66 |
| 6,05                                                 | 4,231  | 4,433  | -0,2021    | 0,7149      | 4  | 4  | 0,2827  | 66 |
| 6,15                                                 | 4,555  | 4,328  | 0,2277     | 0,7149      | 4  | 4  | 0,3185  | 66 |
| 6,7                                                  | 8,634  | 5      | 3,634      | 0,7149      | 4  | 4  | 5,083   | 66 |
| 7                                                    | 7,9    | 4,304  | 3,596      | 0,7149      | 4  | 4  | 5,03    | 66 |
| 8                                                    | 8,37   | 4,393  | 3,978      | 0,7149      | 4  | 4  | 5,564   | 66 |
| 9                                                    | 8,347  | 5,025  | 3,322      | 0,7149      | 4  | 4  | 4,646   | 66 |
| 10                                                   | 8,849  | 4,542  | 4,307      | 0,7149      | 4  | 4  | 6,024   | 66 |

Sup. Fig10B - complex 1

Two-way RM ANOVA      Matching: Stacked  
 Assume sphericity?      Yes  
 Alpha                      0,05

| Source of Variation  | % of total variation | P value | P value summary | Significant? |
|----------------------|----------------------|---------|-----------------|--------------|
| Time x Column Factor | 1,375                | 0,7235  | ns              | No           |
| Time                 | 43,35                | 0,0013  | **              | Yes          |
| Column Factor        | 5,333                | 0,1479  | ns              | No           |
| Subject              | 16,63                | 0,4736  | ns              | No           |

| ANOVA table          | SS    | DF | MS    | F (DFn, DFd)       | P value  |
|----------------------|-------|----|-------|--------------------|----------|
| Time x Column Factor | 196   | 2  | 98,02 | F (2, 16) = 0,3303 | P=0,7235 |
| Time                 | 6180  | 2  | 3090  | F (2, 16) = 10,41  | P=0,0013 |
| Column Factor        | 760,2 | 1  | 760,2 | F (1, 8) = 2,566   | P=0,1479 |
| Subject              | 2370  | 8  | 296,3 | F (8, 16) = 0,9983 | P=0,4736 |
| Residual             | 4748  | 16 | 296,8 |                    |          |

Difference between column means

|                               |                 |
|-------------------------------|-----------------|
| Mean of WT                    | 11,38           |
| Mean of CD200R <sup>-/-</sup> | 21,45           |
| Difference between means      | -10,07          |
| SE of difference              | 6,285           |
| 95% CI of difference          | -24,56 to 4,426 |

Data summary

|                                   |    |
|-----------------------------------|----|
| Number of columns (Column Factor) | 2  |
| Number of rows (Time)             | 3  |
| Number of subjects (Subject)      | 10 |
| Number of missing values          | 0  |

Compare each cell mean with the other cell mean in that row

|                                  |      |
|----------------------------------|------|
| Number of families               | 1    |
| Number of comparisons per family | 3    |
| Alpha                            | 0,05 |

| Bonferroni's multiple comparisons test | Mean Diff, | 95,00% CI of diff, | Significant? | Summary | Adjusted P Value |
|----------------------------------------|------------|--------------------|--------------|---------|------------------|
| WT - CD200R <sup>-/-</sup>             |            |                    |              |         |                  |
| basal                                  | -3,376     | -31,41 to 24,66    | No           | ns      | >0,9999          |
| ADP                                    | -11,04     | -39,08 to 16,99    | No           | ns      | 0,9624           |
| Oligo                                  | -15,79     | -43,82 to 12,25    | No           | ns      | 0,4807           |

| Test details               | Mean 1 | Mean 2 | Mean Diff, | SE of diff, | N1 | N2 | t     | DF |
|----------------------------|--------|--------|------------|-------------|----|----|-------|----|
| WT - CD200R <sup>-/-</sup> |        |        |            |             |    |    |       |    |
| basal                      | 8,132  | 11,51  | -3,376     | 10,89       | 5  | 5  | 0,31  | 24 |
| ADP                        | 30,82  | 41,86  | -11,04     | 10,89       | 5  | 5  | 1,014 | 24 |
| Oligo                      | -4,803 | 10,98  | -15,79     | 10,89       | 5  | 5  | 1,449 | 24 |

Sup. Fig10B - Complex 2

Two-way RM ANOVA Matching: Stacked  
 Assume sphericity? Yes  
 Alpha 0,05

| Source of Variation  | % of total variation | P value | P value summary | Significant? |
|----------------------|----------------------|---------|-----------------|--------------|
| Time x Column Factor | 0,4433               | 0,8681  | ns              | No           |
| Time                 | 32,6                 | 0,0012  | **              | Yes          |
| Column Factor        | 0,03762              | 0,9347  | ns              | No           |
| Subject              | 42,08                | 0,0181  | *               | Yes          |

| ANOVA table          | SS    | DF | MS    | F (DFn, DFd)        | P value  |
|----------------------|-------|----|-------|---------------------|----------|
| Time x Column Factor | 33,8  | 2  | 16,9  | F (2, 16) = 0,1427  | P=0,8681 |
| Time                 | 2485  | 2  | 1243  | F (2, 16) = 10,50   | P=0,0012 |
| Column Factor        | 2,868 | 1  | 2,868 | F (1, 8) = 0,007152 | P=0,9347 |
| Subject              | 3208  | 8  | 401   | F (8, 16) = 3,387   | P=0,0181 |
| Residual             | 1894  | 16 | 118,4 |                     |          |

| Difference between column means |                 |
|---------------------------------|-----------------|
| Mean of WT                      | 7,763           |
| Mean of CD200R <sup>-/-</sup>   | 8,381           |
| Difference between means        | -0,6184         |
| SE of difference                | 7,312           |
| 95% CI of difference            | -17,48 to 16,24 |

| Data summary                      |    |
|-----------------------------------|----|
| Number of columns (Column Factor) | 2  |
| Number of rows (Time)             | 3  |
| Number of subjects (Subject)      | 10 |
| Number of missing values          | 0  |

Compare each cell mean with the other cell mean in that row

|                                  |      |
|----------------------------------|------|
| Number of families               | 1    |
| Number of comparisons per family | 3    |
| Alpha                            | 0,05 |

| Bonferroni's multiple comparisons test | Mean Diff, | 95,00% CI of diff, | Significant? | Summary | Adjusted P Value |
|----------------------------------------|------------|--------------------|--------------|---------|------------------|
| WT - CD200R <sup>-/-</sup>             |            |                    |              |         |                  |
| basal                                  | -3,128     | -26,86 to 20,61    | No           | ns      | >0,9999          |
| ADP                                    | 2,064      | -21,67 to 25,80    | No           | ns      | >0,9999          |
| Oligo                                  | -0,7913    | -24,52 to 22,94    | No           | ns      | >0,9999          |

| Test details               | Mean 1 | Mean 2 | Mean Diff, | SE of diff, | N1 | N2 | t       | DF |
|----------------------------|--------|--------|------------|-------------|----|----|---------|----|
| WT - CD200R <sup>-/-</sup> |        |        |            |             |    |    |         |    |
| basal                      | 8,266  | 11,39  | -3,128     | 9,222       | 5  | 5  | 0,3392  | 24 |
| ADP                        | 19,27  | 17,2   | 2,064      | 9,222       | 5  | 5  | 0,2238  | 24 |
| Oligo                      | -4,245 | -3,454 | -0,7913    | 9,222       | 5  | 5  | 0,08581 | 24 |



Sup Fig10C - Release

|                                        |                             |         |
|----------------------------------------|-----------------------------|---------|
| Column B                               | <i>Cd200r<sup>-/-</sup></i> |         |
| vs.                                    | vs,                         |         |
| Column A                               | WT                          |         |
| Unpaired t test                        |                             |         |
| P value                                |                             | 0,5003  |
| P value summary                        | ns                          |         |
| Significantly different (P < 0.05)?    | No                          |         |
| One- or two-tailed P value?            | Two-tailed                  |         |
| t, df                                  | t=0,7058, df=8              |         |
| How big is the difference?             |                             |         |
| Mean of column A                       |                             | 14323   |
| Mean of column B                       |                             | 24564   |
| Difference between means (B - A) ± SEM | 10241 ± 14509               |         |
| 95% confidence interval                | -23217 to 43699             |         |
| R squared (eta squared)                |                             | 0,05862 |
| F test to compare variances            |                             |         |
| F, DFn, Dfd                            | 3,553, 4, 4                 |         |
| P value                                |                             | 0,2471  |
| P value summary                        | ns                          |         |
| Significantly different (P < 0.05)?    | No                          |         |
| Data analyzed                          |                             |         |
| Sample size, column A                  |                             | 5       |
| Sample size, column B                  |                             | 5       |

## Sup Fig10C - MTDR

|                                        |                             |
|----------------------------------------|-----------------------------|
| Column B                               | <i>Cd200r<sup>-/-</sup></i> |
| vs.                                    | vs,                         |
| Column A                               | WT                          |
| Unpaired t test                        |                             |
| P value                                | 0,492                       |
| P value summary                        | ns                          |
| Significantly different (P < 0.05)?    | No                          |
| One- or two-tailed P value?            | Two-tailed                  |
| t, df                                  | t=0,7200, df=8              |
| How big is the difference?             |                             |
| Mean of column A                       | 5560                        |
| Mean of column B                       | 8130                        |
| Difference between means (B - A) ± SEM | 2569 ± 3568                 |
| 95% confidence interval                | -5659 to 10798              |
| R squared (eta squared)                | 0,06086                     |
| F test to compare variances            |                             |
| F, DFn, Dfd                            | 6,869, 4, 4                 |
| P value                                | 0,0887                      |
| P value summary                        | ns                          |
| Significantly different (P < 0.05)?    | No                          |
| Data analyzed                          |                             |
| Sample size, column A                  | 5                           |
| Sample size, column B                  | 5                           |

## Sup. Fig10D

Two-way ANOVA Ordinary  
Alpha 0,05

| Source of Variation | % of total variation | P value | P value sur | Significant? |
|---------------------|----------------------|---------|-------------|--------------|
| Interaction         | 4,4                  | 0,8034  | ns          | No           |
| Time                | 19                   | 0,1043  | ns          | No           |
| Treatment           | 0,024                | 0,9109  | ns          | No           |

| ANOVA table | SS (Type III) | DF | MS    | F (DFn, DF P value   |
|-------------|---------------|----|-------|----------------------|
| Interaction | 79383         | 5  | 15877 | F (5, 40) = P=0,8034 |
| Time        | 339661        | 5  | 67932 | F (5, 40) = P=0,1043 |
| Treatment   | 437           | 1  | 437   | F (1, 40) = P=0,9109 |
| Residual    | 1380086       | 40 | 34502 |                      |

| Difference between column means    |             |
|------------------------------------|-------------|
| Predicted (LS) mean of F4/80       | 140         |
| Predicted (LS) mean of Other       | 134         |
| Difference between predicted means | 6           |
| SE of difference                   | 53          |
| 95% CI of difference               | -101 to 113 |

| Data summary                  |    |
|-------------------------------|----|
| Number of columns (Treatment) | 2  |
| Number of rows (Time)         | 6  |
| Number of values              | 52 |

Within each column, compare rows (simple effects within columns)

| Number of families               | 2    |
|----------------------------------|------|
| Number of comparisons per family | 5    |
| Alpha                            | 0,05 |

| Bonferroni's multiple comparisons test | Predicted (LS) mean diff, | 95,00% CI | Significant? | Summary | Adjusted P Value |
|----------------------------------------|---------------------------|-----------|--------------|---------|------------------|
|----------------------------------------|---------------------------|-----------|--------------|---------|------------------|

|           |      |             |    |    |         |
|-----------|------|-------------|----|----|---------|
| F4/80     |      |             |    |    |         |
| WT vs. KO | 0,49 | -410 to 411 | No | ns | >0,9999 |
| WT vs. WT | -220 | -587 to 147 | No | ns | 0,5657  |
| WT vs. KO | -274 | -640 to 93  | No | ns | 0,2525  |
| WT vs. WT | -16  | -383 to 351 | No | ns | >0,9999 |
| WT vs. KO | -6,8 | -374 to 360 | No | ns | >0,9999 |

|           |      |             |    |    |         |
|-----------|------|-------------|----|----|---------|
| Other     |      |             |    |    |         |
| WT vs. KO | 28   | -382 to 436 | No | ns | >0,9999 |
| WT vs. WT | -45  | -412 to 322 | No | ns | >0,9999 |
| WT vs. KO | -105 | -472 to 262 | No | ns | >0,9999 |
| WT vs. WT | -22  | -389 to 345 | No | ns | >0,9999 |
| WT vs. KO | 26   | -341 to 391 | No | ns | >0,9999 |

| Test details | Predicted (LS) mean 1 | Predicted (LS) mean 2 | Predicted (LS) mean diff | SE of diff | N1 | N2 | t | DF |
|--------------|-----------------------|-----------------------|--------------------------|------------|----|----|---|----|
|--------------|-----------------------|-----------------------|--------------------------|------------|----|----|---|----|

|           |    |     |      |     |   |   |        |    |
|-----------|----|-----|------|-----|---|---|--------|----|
| F4/80     |    |     |      |     |   |   |        |    |
| WT vs. KO | 55 | 54  | 0,49 | 152 | 3 | 3 | 0,0032 | 40 |
| WT vs. WT | 55 | 274 | -220 | 136 | 3 | 5 | 1,6    | 40 |
| WT vs. KO | 55 | 328 | -274 | 136 | 3 | 5 | 2      | 40 |
| WT vs. WT | 55 | 70  | -16  | 136 | 3 | 5 | 0,12   | 40 |
| WT vs. KO | 55 | 61  | -6,8 | 136 | 3 | 5 | 0,05   | 40 |

|           |     |     |      |     |   |   |      |    |
|-----------|-----|-----|------|-----|---|---|------|----|
| Other     |     |     |      |     |   |   |      |    |
| WT vs. KO | 115 | 87  | 28   | 152 | 3 | 3 | 0,19 | 40 |
| WT vs. WT | 115 | 160 | -45  | 136 | 3 | 5 | 0,33 | 40 |
| WT vs. KO | 115 | 220 | -105 | 136 | 3 | 5 | 0,77 | 40 |
| WT vs. WT | 115 | 137 | -22  | 136 | 3 | 5 | 0,16 | 40 |
| WT vs. KO | 115 | 89  | 26   | 136 | 3 | 5 | 0,19 | 40 |

Sup Fig10E

|                             |                      |         |             |                       |
|-----------------------------|----------------------|---------|-------------|-----------------------|
| Two-way ANOVA               | Ordinary             |         |             |                       |
| Alpha                       | 0,05                 |         |             |                       |
| Source of Variation         | % of total variation | P value | P value sur | Significant?          |
| Interaction                 | 6,3                  | 0,8509  | ns          | No                    |
| Row Factor                  | 14                   | 0,0485  | *           | Yes                   |
| Time                        | 8,7                  | 0,0281  | *           | Yes                   |
| ANOVA table                 | SS (Type III)        | DF      | MS          | F (DFn, DF) P value   |
| Interaction                 | 55058                | 10      | 5506        | F (10, 60) = P=0,8509 |
| Row Factor                  | 120496               | 5       | 24099       | F (5, 60) = P=0,0485  |
| Time                        | 76586                | 2       | 38293       | F (2, 60) = P=0,0281  |
| Residual                    | 605910               | 60      | 10099       |                       |
| Data summary                |                      |         |             |                       |
| Number of columns (Time)    | 3                    |         |             |                       |
| Number of rows (Row Factor) | 6                    |         |             |                       |
| Number of values            | 78                   |         |             |                       |

Within each column, compare rows (simple effects within columns)

|                                  |      |
|----------------------------------|------|
| Number of families               | 3    |
| Number of comparisons per family | 5    |
| Alpha                            | 0,05 |

Bonferroni's multiple comparisons test Predicted (LS) mean diff, 95,00% CI Significant Summary Adjusted P Value

|           |      |             |    |    |         |
|-----------|------|-------------|----|----|---------|
| iNos      |      |             |    |    |         |
| KO vs. WT | -4   | -222 to 214 | No | ns | >0,9999 |
| KO vs. WT | -9,1 | -204 to 18€ | No | ns | >0,9999 |
| KO vs. KO | -22  | -217 to 174 | No | ns | >0,9999 |
| KO vs. WT | -6,8 | -202 to 18€ | No | ns | >0,9999 |
| KO vs. KO | -3,3 | -199 to 192 | No | ns | >0,9999 |
| CD206     |      |             |    |    |         |
| KO vs. WT | -2,6 | -221 to 21€ | No | ns | >0,9999 |
| KO vs. WT | -117 | -312 to 79  | No | ns | 0,5868  |
| KO vs. KO | -169 | -364 to 26  | No | ns | 0,1248  |
| KO vs. WT | -11  | -206 to 184 | No | ns | >0,9999 |
| KO vs. KO | -5,2 | -200 to 19€ | No | ns | >0,9999 |
| Other     |      |             |    |    |         |
| KO vs. WT | 6,2  | -212 to 224 | No | ns | >0,9999 |
| KO vs. WT | -95  | -290 to 101 | No | ns | >0,9999 |
| KO vs. KO | -84  | -279 to 112 | No | ns | >0,9999 |
| KO vs. WT | 1,5  | -194 to 197 | No | ns | >0,9999 |
| KO vs. KO | 1,3  | -194 to 19€ | No | ns | >0,9999 |

| Test details | Predicted (LS) mean | 1   | Predicted ( | Predicted ( | SE of diff, | N1 | N2    | t  | DF |
|--------------|---------------------|-----|-------------|-------------|-------------|----|-------|----|----|
| iNos         |                     |     |             |             |             |    |       |    |    |
| KO vs. WT    | 6,3                 | 10  | -4          | 82          | 3           | 3  | 0,049 | 60 |    |
| KO vs. WT    | 6,3                 | 15  | -9,1        | 73          | 3           | 5  | 0,12  | 60 |    |
| KO vs. KO    | 6,3                 | 28  | -22         | 73          | 3           | 5  | 0,29  | 60 |    |
| KO vs. WT    | 6,3                 | 13  | -6,8        | 73          | 3           | 5  | 0,092 | 60 |    |
| KO vs. KO    | 6,3                 | 9,6 | -3,3        | 73          | 3           | 5  | 0,045 | 60 |    |
| CD206        |                     |     |             |             |             |    |       |    |    |
| KO vs. WT    | 40                  | 43  | -2,6        | 82          | 3           | 3  | 0,032 | 60 |    |
| KO vs. WT    | 40                  | 156 | -117        | 73          | 3           | 5  | 1,6   | 60 |    |
| KO vs. KO    | 40                  | 209 | -169        | 73          | 3           | 5  | 2,3   | 60 |    |
| KO vs. WT    | 40                  | 51  | -11         | 73          | 3           | 5  | 0,15  | 60 |    |
| KO vs. KO    | 40                  | 45  | -5,2        | 73          | 3           | 5  | 0,071 | 60 |    |
| Other        |                     |     |             |             |             |    |       |    |    |
| KO vs. WT    | 7,9                 | 1,8 | 6,2         | 82          | 3           | 3  | 0,075 | 60 |    |
| KO vs. WT    | 7,9                 | 102 | -95         | 73          | 3           | 5  | 1,3   | 60 |    |
| KO vs. KO    | 7,9                 | 92  | -84         | 73          | 3           | 5  | 1,1   | 60 |    |
| KO vs. WT    | 7,9                 | 6,5 | 1,5         | 73          | 3           | 5  | 0,02  | 60 |    |
| KO vs. KO    | 7,9                 | 6,7 | 1,3         | 73          | 3           | 5  | 0,017 | 60 |    |

Sup. Fig10F

Table Analyzed F4/80 gem, CD200R vs WT

Column B *Cd200r*<sup>-/-</sup>

vs. vs,

Column A WT

Unpaired t test

P value 0,9879

P value summary ns

Significantly different (P < 0.05)? No

One- or two-tailed P value? Two-tailed

t, df t=0,01565, df=8

How big is the difference?

Mean of column A 2,893

Mean of column B 2,888

Difference between means (B - A) -0,005363 ± 0,3427

95% confidence interval -0,7957 to 0,7849

R squared (eta squared) 0,00003061

F test to compare variances

F, DFn, Dfd 1,794, 4, 4

P value 0,5852

P value summary ns

Significantly different (P < 0.05)? No

Data analyzed

Sample size, column A 5

Sample size, column B 5

Sup. Fig10G

|                                          |                             |        |
|------------------------------------------|-----------------------------|--------|
| Table Analyzed                           | CD206 gem, CD200R vs WT     |        |
| Column B                                 | <i>Cd200r<sup>-/-</sup></i> |        |
| vs.                                      | vs,                         |        |
| Column A                                 | WT                          |        |
| Paired t test                            |                             |        |
| P value                                  |                             | 0,128  |
| P value summary                          | ns                          |        |
| Significantly different (P < 0.05)?      | No                          |        |
| One- or two-tailed P value?              | Two-tailed                  |        |
| t, df                                    | t=1,915, df=4               |        |
| Number of pairs                          |                             | 5      |
| How big is the difference?               |                             |        |
| Mean of differences (B - A)              |                             | 0,4509 |
| SD of differences                        |                             | 0,5264 |
| SEM of differences                       |                             | 0,2354 |
| 95% confidence interval                  | -0,2027 to 1,104            |        |
| R squared (partial eta squared)          |                             | 0,4784 |
| How effective was the pairing?           |                             |        |
| Correlation coefficient (r)              |                             | 0,3091 |
| P value (one tailed)                     |                             | 0,3064 |
| P value summary                          | ns                          |        |
| Was the pairing significantly effective? | No                          |        |

Sup. Fig11

Two-way RM ANOVA Matching: Stacked  
 Assume sphericity? Yes  
 Alpha 0,05

| Source of Variation | % of total variation | P value | P value summary | Significant? |
|---------------------|----------------------|---------|-----------------|--------------|
| Time x Treatment    | 18,51                | <0,0001 | ****            | Yes          |
| Time                | 56,3                 | <0,0001 | ****            | Yes          |
| Treatment           | 5,726                | <0,0001 | ****            | Yes          |
| Subject             | 0,755                | 0,985   | ns              | No           |

| ANOVA table      | SS    | DF | MS     | F (DFn, DFd)        | P value  |
|------------------|-------|----|--------|---------------------|----------|
| Time x Treatment | 74,94 | 14 | 5,353  | F (14, 70) = 4,794  | P<0,0001 |
| Time             | 228   | 7  | 32,57  | F (7, 70) = 29,16   | P<0,0001 |
| Treatment        | 23,19 | 2  | 11,59  | F (2, 10) = 37,92   | P<0,0001 |
| Subject          | 3,057 | 10 | 0,3057 | F (10, 70) = 0,2738 | P=0,9850 |
| Residual         | 78,17 | 70 | 1,117  |                     |          |

Data summary  
 Number of columns (Treatment) 3  
 Number of rows (Time) 8  
 Number of subjects (Subject) 13  
 Number of missing values 0

Within each row, compare columns (simple effects within rows)

Number of families 8  
 Number of comparisons per family 2  
 Alpha 0,05

Dunnett's multiple comparisons test Predicted (LS) mean ± 95,00% CI of diff. Significant? Summary Adjusted P Value

|                                                           | Predicted (LS) mean ± 95,00% CI of diff. | Significant?     | Summary | Adjusted P Value |         |
|-----------------------------------------------------------|------------------------------------------|------------------|---------|------------------|---------|
| 0                                                         |                                          |                  |         |                  |         |
| MMdtr + Carr + Vesicles WT vs. MMdtr + Carr + Vesicles KO | -0,5478                                  | -2,150 to 1,054  | No      | ns               | 0,6568  |
| MMdtr + Carr + Vesicles WT vs. MMdtr + Carr + Vesicle sup | 0,2804                                   | -1,239 to 1,800  | No      | ns               | 0,8809  |
| 2                                                         |                                          |                  |         |                  |         |
| MMdtr + Carr + Vesicles WT vs. MMdtr + Carr + Vesicles KO | -0,02833                                 | -1,630 to 1,574  | No      | ns               | 0,9988  |
| MMdtr + Carr + Vesicles WT vs. MMdtr + Carr + Vesicle sup | -0,1593                                  | -1,679 to 1,361  | No      | ns               | 0,9594  |
| 6                                                         |                                          |                  |         |                  |         |
| MMdtr + Carr + Vesicles WT vs. MMdtr + Carr + Vesicles KO | -0,8646                                  | -2,467 to 0,7375 | No      | ns               | 0,3722  |
| MMdtr + Carr + Vesicles WT vs. MMdtr + Carr + Vesicle sup | -0,5394                                  | -2,059 to 0,9804 | No      | ns               | 0,6367  |
| 8                                                         |                                          |                  |         |                  |         |
| MMdtr + Carr + Vesicles WT vs. MMdtr + Carr + Vesicles KO | 0,5538                                   | -1,048 to 2,156  | No      | ns               | 0,651   |
| MMdtr + Carr + Vesicles WT vs. MMdtr + Carr + Vesicle sup | 0,2018                                   | -1,318 to 1,722  | No      | ns               | 0,9359  |
| 8.05                                                      |                                          |                  |         |                  |         |
| MMdtr + Carr + Vesicles WT vs. MMdtr + Carr + Vesicles KO | 0,7737                                   | -0,8283 to 2,376 | No      | ns               | 0,4469  |
| MMdtr + Carr + Vesicles WT vs. MMdtr + Carr + Vesicle sup | 0,36                                     | -1,160 to 1,880  | No      | ns               | 0,813   |
| 8.15                                                      |                                          |                  |         |                  |         |
| MMdtr + Carr + Vesicles WT vs. MMdtr + Carr + Vesicles KO | 3,465                                    | 1,863 to 5,067   | Yes     | ****             | <0,0001 |
| MMdtr + Carr + Vesicles WT vs. MMdtr + Carr + Vesicle sup | 3,171                                    | 1,651 to 4,691   | Yes     | ****             | <0,0001 |
| 8.4                                                       |                                          |                  |         |                  |         |
| MMdtr + Carr + Vesicles WT vs. MMdtr + Carr + Vesicles KO | 4,339                                    | 2,737 to 5,941   | Yes     | ****             | <0,0001 |
| MMdtr + Carr + Vesicles WT vs. MMdtr + Carr + Vesicle sup | 4,996                                    | 3,476 to 6,516   | Yes     | ****             | <0,0001 |
| 9                                                         |                                          |                  |         |                  |         |
| MMdtr + Carr + Vesicles WT vs. MMdtr + Carr + Vesicles KO | -0,1804                                  | -1,782 to 1,422  | No      | ns               | 0,9534  |
| MMdtr + Carr + Vesicles WT vs. MMdtr + Carr + Vesicle sup | 0,3051                                   | -1,215 to 1,825  | No      | ns               | 0,861   |

| Test details                                              | Predicted (LS) mean 1 | Predicted (LS) mean 2 | Predicted (LS) mean ± SE of diff. | N1     | N2 | q | DF         |
|-----------------------------------------------------------|-----------------------|-----------------------|-----------------------------------|--------|----|---|------------|
| 0                                                         |                       |                       |                                   |        |    |   |            |
| MMdtr + Carr + Vesicles WT vs. MMdtr + Carr + Vesicles KO | 7,983                 | 8,53                  | -0,5478                           | 0,7125 | 4  | 4 | 0,7687 80  |
| MMdtr + Carr + Vesicles WT vs. MMdtr + Carr + Vesicle sup | 7,983                 | 7,702                 | 0,2804                            | 0,676  | 4  | 5 | 0,4149 80  |
| 2                                                         |                       |                       |                                   |        |    |   |            |
| MMdtr + Carr + Vesicles WT vs. MMdtr + Carr + Vesicles KO | 3,205                 | 3,233                 | -0,02833                          | 0,7125 | 4  | 4 | 0,03977 80 |
| MMdtr + Carr + Vesicles WT vs. MMdtr + Carr + Vesicle sup | 3,205                 | 3,364                 | -0,1593                           | 0,676  | 4  | 5 | 0,2357 80  |
| 6                                                         |                       |                       |                                   |        |    |   |            |
| MMdtr + Carr + Vesicles WT vs. MMdtr + Carr + Vesicles KO | 3,123                 | 3,988                 | -0,8646                           | 0,7125 | 4  | 4 | 1,213 80   |
| MMdtr + Carr + Vesicles WT vs. MMdtr + Carr + Vesicle sup | 3,123                 | 3,662                 | -0,5394                           | 0,676  | 4  | 5 | 0,798 80   |
| 8                                                         |                       |                       |                                   |        |    |   |            |
| MMdtr + Carr + Vesicles WT vs. MMdtr + Carr + Vesicles KO | 3,624                 | 3,07                  | 0,5538                            | 0,7125 | 4  | 4 | 0,7772 80  |
| MMdtr + Carr + Vesicles WT vs. MMdtr + Carr + Vesicle sup | 3,624                 | 3,422                 | 0,2018                            | 0,676  | 4  | 5 | 0,2986 80  |
| 8.05                                                      |                       |                       |                                   |        |    |   |            |
| MMdtr + Carr + Vesicles WT vs. MMdtr + Carr + Vesicles KO | 4,127                 | 3,353                 | 0,7737                            | 0,7125 | 4  | 4 | 1,086 80   |
| MMdtr + Carr + Vesicles WT vs. MMdtr + Carr + Vesicle sup | 4,127                 | 3,767                 | 0,36                              | 0,676  | 4  | 5 | 0,5326 80  |
| 8.15                                                      |                       |                       |                                   |        |    |   |            |
| MMdtr + Carr + Vesicles WT vs. MMdtr + Carr + Vesicles KO | 6,888                 | 3,423                 | 3,465                             | 0,7125 | 4  | 4 | 4,863 80   |
| MMdtr + Carr + Vesicles WT vs. MMdtr + Carr + Vesicle sup | 6,888                 | 3,717                 | 3,171                             | 0,676  | 4  | 5 | 4,691 80   |
| 8.4                                                       |                       |                       |                                   |        |    |   |            |
| MMdtr + Carr + Vesicles WT vs. MMdtr + Carr + Vesicles KO | 8,042                 | 3,703                 | 4,339                             | 0,7125 | 4  | 4 | 6,09 80    |
| MMdtr + Carr + Vesicles WT vs. MMdtr + Carr + Vesicle sup | 8,042                 | 3,046                 | 4,996                             | 0,676  | 4  | 5 | 7,391 80   |
| 9                                                         |                       |                       |                                   |        |    |   |            |
| MMdtr + Carr + Vesicles WT vs. MMdtr + Carr + Vesicles KO | 3,75                  | 3,93                  | -0,1804                           | 0,7125 | 4  | 4 | 0,2532 80  |
| MMdtr + Carr + Vesicles WT vs. MMdtr + Carr + Vesicle sup | 3,75                  | 3,445                 | 0,3051                            | 0,676  | 4  | 5 | 0,4513 80  |

Sup. Fig12A

Two-way RM ANOVA      Matching: Stacked  
 Assume sphericity?      Yes  
 Alpha                      0,05

| Source of Variation | % of total variation | P value | P value summary | Significant? |
|---------------------|----------------------|---------|-----------------|--------------|
| Time x Treatment    | 0,89                 | 0,7354  | ns              | No           |
| Time                | 86                   | <0,0001 | ****            | Yes          |
| Treatment           | 0,27                 | 0,4705  | ns              | No           |
| Subject             | 2,7                  | 0,2516  | ns              | No           |

| ANOVA table      | SS  | DF | MS   | F (DFn, DFd)     | P value  |
|------------------|-----|----|------|------------------|----------|
| Time x Treatment | 2,3 | 5  | 0,47 | F (5, 30) = 0,55 | P=0,7354 |
| Time             | 225 | 5  | 45   | F (5, 30) = 53   | P<0,0001 |
| Treatment        | 0,7 | 1  | 0,7  | F (1, 6) = 0,59  | P=0,4705 |
| Subject          | 7   | 6  | 1,2  | F (6, 30) = 1,4  | P=0,2516 |
| Residual         | 25  | 30 | 0,84 |                  |          |

Difference between column means  
 Mean of WT Carr            5  
 Mean of CD200 Carr        5,2  
 Difference between means   -0,24  
 SE of difference            0,31  
 95% CI of difference        -1,0 to 0,52

Data summary  
 Number of columns (Treatment)    2  
 Number of rows (Time)            6  
 Number of subjects (Subject)      8  
 Number of missing values          0

Compare each cell mean with the other cell mean in that row

Number of families            1  
 Number of comparisons per family   6  
 Alpha                            0,05

| Sidak's multiple comparisons test | Mean Diff. | 95,00% CI of diff. | Significant? | Summary | Adjusted P Value |
|-----------------------------------|------------|--------------------|--------------|---------|------------------|
| WT Carr - CD200 Carr              |            |                    |              |         |                  |
| 0                                 | -0,066     | -1,9 to 1,8        | No           | ns      | >0,9999          |
| 0,5                               | -0,016     | -1,9 to 1,9        | No           | ns      | >0,9999          |
| 1                                 | 0,33       | -1,5 to 2,2        | No           | ns      | 0,9971           |
| 2                                 | -1,1       | -3,0 to 0,76       | No           | ns      | 0,4949           |
| 3                                 | -0,31      | -2,2 to 1,6        | No           | ns      | 0,9979           |
| 4                                 | -0,27      | -2,1 to 1,6        | No           | ns      | 0,999            |

| Test details         | Mean 1 | Mean 2 | Mean Diff. | SE of diff. | N1 | N2 | t     | DF |
|----------------------|--------|--------|------------|-------------|----|----|-------|----|
| WT Carr - CD200 Carr |        |        |            |             |    |    |       |    |
| 0                    | 7,7    | 7,8    | -0,066     | 0,67        | 4  | 4  | 0,098 | 36 |
| 0,5                  | 3      | 3,1    | -0,016     | 0,67        | 4  | 4  | 0,024 | 36 |
| 1                    | 3,6    | 3,3    | 0,33       | 0,67        | 4  | 4  | 0,5   | 36 |
| 2                    | 2,6    | 3,7    | -1,1       | 0,67        | 4  | 4  | 1,7   | 36 |
| 3                    | 4,7    | 5      | -0,31      | 0,67        | 4  | 4  | 0,47  | 36 |
| 4                    | 8,2    | 8,4    | -0,27      | 0,67        | 4  | 4  | 0,41  | 36 |



Sup. Fig12B

|                                           |         |
|-------------------------------------------|---------|
| ANOVA summary                             |         |
| F                                         | 9,596   |
| P value                                   | <0,0001 |
| P value summary                           | ****    |
| Significant diff. among means (P < 0.05)? | Yes     |
| R squared                                 | 0.6153  |

|                                             |                |
|---------------------------------------------|----------------|
| Brown-Forsythe test                         |                |
| F (DFn, DFd)                                | 0,6834 (5, 30) |
| P value                                     | 0,6396         |
| P value summary                             | ns             |
| Are SDs significantly different (P < 0.05)? | No             |

|                                             |        |
|---------------------------------------------|--------|
| Bartlett's test                             |        |
| Bartlett's statistic (corrected)            | 2,588  |
| P value                                     | 0,7633 |
| P value summary                             | ns     |
| Are SDs significantly different (P < 0.05)? | No     |

|                             |       |    |         |                   |          |
|-----------------------------|-------|----|---------|-------------------|----------|
| ANOVA table                 |       |    |         |                   |          |
| Treatment (between columns) | SS    | DF | MS      | F (DFn, DFd)      | P value  |
| Residual (within columns)   | 1,642 | 5  | 0,3284  | F (5, 30) = 9,596 | P<0,0001 |
| Total                       | 1,027 | 30 | 0,03422 |                   |          |
|                             | 2,669 | 35 |         |                   |          |

|                                |    |
|--------------------------------|----|
| Data summary                   |    |
| Number of treatments (columns) | 6  |
| Number of values (total)       | 36 |

|                                  |  |      |
|----------------------------------|--|------|
| Number of families               |  | 1    |
| Number of comparisons per family |  | 5    |
| Alpha                            |  | 0,05 |

| Dunnnett's multiple comparisons test | Mean Diff. | 95.00% CI of diff. | Significant? | Summary | Adjusted P Value | A-? |   |
|--------------------------------------|------------|--------------------|--------------|---------|------------------|-----|---|
| 0 vs. 1                              | -0,1073    | -0,3911 to 0,1765  | No           | ns      | 0,7711           | B   | 1 |
| 0 vs. 2                              | -0,1405    | -0,4243 to 0,1433  | No           | ns      | 0,5581           | C   | 2 |
| 0 vs. 3                              | -0,3848    | -0,6686 to -0,1010 | Yes          | **      | 0,005            | D   | 3 |
| 0 vs. 4                              | -0,6208    | -0,9045 to -0,3370 | Yes          | ****    | <0,0001          | E   | 4 |
| 0 vs. 7                              | -0,4175    | -0,7013 to -0,1337 | Yes          | **      | 0,0022           | F   | 7 |

| Test details |        | Mean 1 | Mean 2  | Mean Diff. | SE of diff. | n1 | n2    | q  | DF |
|--------------|--------|--------|---------|------------|-------------|----|-------|----|----|
| 0 vs. 1      | 0,4947 | 0,602  | -0,1073 | 0,1068     | 6           | 6  | 1,005 | 30 |    |
| 0 vs. 2      | 0,4947 | 0,6352 | -0,1405 | 0,1068     | 6           | 6  | 1,315 | 30 |    |
| 0 vs. 3      | 0,4947 | 0,8795 | -0,3848 | 0,1068     | 6           | 6  | 3,603 | 30 |    |
| 0 vs. 4      | 0,4947 | 1,115  | -0,6208 | 0,1068     | 6           | 6  | 5,812 | 30 |    |
| 0 vs. 7      | 0,4947 | 0,9122 | -0,4175 | 0,1068     | 6           | 6  | 3,909 | 30 |    |

Sup. Fig12C

ANOVA summary

|                                          |        |
|------------------------------------------|--------|
| F                                        | 1,212  |
| P value                                  | 0,3276 |
| P value summary                          | ns     |
| Significant dif. among means (P < 0.05)? | No     |
| R squared                                | 0,168  |

Brown-Forsythe test

|                                             |                |
|---------------------------------------------|----------------|
| F (DFn, DFd)                                | 0,8782 (5, 30) |
| P value                                     | 0,5075         |
| P value summary                             | ns             |
| Are SDs significantly different (P < 0.05)? | No             |

Bartlett's test

|                                             |       |
|---------------------------------------------|-------|
| Bartlett's statistic (corrected)            | 15,08 |
| P value                                     | 0,01  |
| P value summary                             | -     |
| Are SDs significantly different (P < 0.05)? | Yes   |

ANOVA table

|                             | SS        | DF | MS        | F (DFn, DFd)      | P value  |
|-----------------------------|-----------|----|-----------|-------------------|----------|
| Treatment (between columns) | 0,0006738 | 5  | 0,0001348 | F (5, 30) = 1,212 | P=0,3276 |
| Residual (within columns)   | 0,003336  | 30 | 0,0001112 |                   |          |
| Total                       | 0,00401   | 35 |           |                   |          |

Data summary

|                                |    |
|--------------------------------|----|
| Number of treatments (columns) | 6  |
| Number of values (total)       | 36 |

Number of families

|                                  |      |
|----------------------------------|------|
| Number of comparisons per family | 5    |
| Alpha                            | 0,05 |

Dunnett's multiple comparisons test

|         | Mean Diff. | 95,00% CI of diff.    | Significant? | Summary | Adjusted P Value | A-? |
|---------|------------|-----------------------|--------------|---------|------------------|-----|
| 0 vs. 1 | 0,006196   | -0,009981 to 0,022337 | No           | ns      | 0,7629           | B 1 |
| 0 vs. 2 | -0,007173  | -0,02335 to 0,009003  | No           | ns      | 0,5535           | C 2 |
| 0 vs. 3 | -0,001037  | -0,01721 to 0,01514   | No           | ns      | 0,9997           | D 3 |
| 0 vs. 4 | 0,004786   | -0,01139 to 0,02096   | No           | ns      | 0,8947           | E 4 |
| 0 vs. 7 | 0,0003897  | -0,01579 to 0,01657   | No           | ns      | >0,9999          | F 7 |

Test details

|         | Mean 1  | Mean 2  | Mean Diff. | SE of diff. | n1 | n2 | q      | DF |
|---------|---------|---------|------------|-------------|----|----|--------|----|
| 0 vs. 1 | 0,02028 | 0,01409 | 0,006196   | 0,006088    | 6  | 6  | 1,018  | 30 |
| 0 vs. 2 | 0,02028 | 0,02745 | -0,007173  | 0,006088    | 6  | 6  | 1,178  | 30 |
| 0 vs. 3 | 0,02028 | 0,02132 | -0,001037  | 0,006088    | 6  | 6  | 0,1704 | 30 |
| 0 vs. 4 | 0,02028 | 0,0155  | 0,004786   | 0,006088    | 6  | 6  | 0,7861 | 30 |
| 0 vs. 7 | 0,02028 | 0,01989 | 0,0003897  | 0,006088    | 6  | 6  | 0,064  | 30 |

Sup. Fig 12D

Table Analyzed N2A silencig Aso test

| Two-way ANOVA       |                      | Ordinary |                 |                   |              |         |
|---------------------|----------------------|----------|-----------------|-------------------|--------------|---------|
| Alpha               |                      | 0,05     |                 |                   |              |         |
| Source of Variation | % of total variation | P value  | P value summary | Significant?      |              |         |
| Interaction         | 13,96                | 0,0084   | **              | Yes               |              |         |
| Row Factor          | 28,47                | 0,0006   | ***             | Yes               |              |         |
| Treatment           | 32,85                | 0,0003   | ***             | Yes               |              |         |
| ANOVA table         |                      | SS       | DF              | MS                | F (DFn, DFd) | P value |
| Interaction         | 0,3289               | 1        | 0,3289          | F (1, 16) = 9,039 | P=0,0084     |         |
| Row Factor          | 0,6707               | 1        | 0,6707          | F (1, 16) = 18,43 | P=0,0006     |         |
| Treatment           | 0,774                | 1        | 0,774           | F (1, 16) = 21,27 | P=0,0003     |         |
| Residual            | 0,5822               | 16       | 0,03639         |                   |              |         |

Difference between column means

|                          |                  |
|--------------------------|------------------|
| Mean of Si-Scrb1         | 1,115            |
| Mean of Si-Isec1         | 0,7215           |
| Difference between means | 0,3934           |
| SE of difference         | 0,08531          |
| 95% CI of difference     | 0,2126 to 0,5743 |

Difference between row means

|                          |                  |
|--------------------------|------------------|
| Mean of Cd200            | 1,101            |
| Mean of Isec1/Gm690      | 0,735            |
| Difference between means | 0,3662           |
| SE of difference         | 0,08531          |
| 95% CI of difference     | 0,1854 to 0,5471 |

Interaction CI

|                       |                    |
|-----------------------|--------------------|
| Mean diff, A1 - B1    | 0,1369             |
| Mean diff, A2 - B2    | 0,6499             |
| (A1 - B1) - (A2 - B2) | -0,513             |
| 95% CI of difference  | -0,8747 to -0,1513 |
| (B1 - A1) - (B2 - A2) | 0,513              |
| 95% CI of difference  | 0,1513 to 0,8747   |

Data summary

|                               |    |
|-------------------------------|----|
| Number of columns (Treatment) | 2  |
| Number of rows (Row Factor)   | 2  |
| Number of values              | 20 |

Compare each cell mean with the other cell mean in that row

|                                  |      |
|----------------------------------|------|
| Number of families               | 1    |
| Number of comparisons per family | 2    |
| Alpha                            | 0,05 |

| Sidak's multiple comparisons test | Mean Diff. | 95,00% CI of diff. | Significant? | Summary | Adjusted P Value |
|-----------------------------------|------------|--------------------|--------------|---------|------------------|
| Si-Scrb1 - Si-Isec1               |            |                    |              |         |                  |
| Cd200                             | 0,1369     | -0,1606 to 0,4345  | No           | ns      | 0,4716           |
| Isec1/Gm690                       | 0,6499     | 0,3523 to 0,9475   | Yes          | ***     | 0,0001           |

| Test details        | Mean 1 | Mean 2 | Mean Diff. | SE of diff. | N1 | N2 | t     | DF |
|---------------------|--------|--------|------------|-------------|----|----|-------|----|
| Si-Scrb1 - Si-Isec1 |        |        |            |             |    |    |       |    |
| Cd200               | 1,17   | 1,033  | 0,1369     | 0,1206      | 5  | 5  | 1,135 | 16 |
| Isec1/Gm690         | 1,06   | 0,4101 | 0,6499     | 0,1206      | 5  | 5  | 5,387 | 16 |

## Sup. Fig12E

|                                            |                        |
|--------------------------------------------|------------------------|
| Table Analyzed                             | iSec1                  |
| Column B                                   | ASO iSec1              |
| vs.                                        | vs,                    |
| Column A                                   | ASO MM                 |
| Unpaired t test                            |                        |
| P value                                    | 0,0347                 |
| P value summary                            | *                      |
| Significantly different (P < 0.05)?        | Yes                    |
| One- or two-tailed P value?                | Two-tailed             |
| t, df                                      | t=2,541, df=8          |
| How big is the difference?                 |                        |
| Mean of column A                           | 0,1967                 |
| Mean of column B                           | 0,1598                 |
| Difference between means (B - A) $\pm$ SEM | -0,03695 $\pm$ 0,01454 |
| 95% confidence interval                    | -0,07049 to -0,003411  |
| R squared (eta squared)                    | 0,4465                 |
| F test to compare variances                |                        |
| F, DFn, Dfd                                | 8,087, 4, 4            |
| P value                                    | 0,0673                 |
| P value summary                            | ns                     |
| Significantly different (P < 0.05)?        | No                     |
| Data analyzed                              |                        |
| Sample size, column A                      | 5                      |
| Sample size, column B                      | 5                      |

Sup. Fig12F

Two-way RM ANOVA      Matching: Stacked  
 Assume sphericity?      Yes  
 Alpha      0,05

| Source of Variation | % of total variation | P value | P value summary | Significant? |
|---------------------|----------------------|---------|-----------------|--------------|
| Time x Treatment    | 10,52                | <0,0001 | ****            | Yes          |
| Time                | 71,26                | <0,0001 | ****            | Yes          |
| Treatment           | 6,812                | 0,0042  | **              | Yes          |
| Subject             | 2,753                | 0,0564  | ns              | No           |

| ANOVA table      | SS    | DF | MS     | F (DFn, DFd)      | P value  |
|------------------|-------|----|--------|-------------------|----------|
| Time x Treatment | 42,84 | 8  | 5,355  | F (8, 56) = 7,084 | P<0,0001 |
| Time             | 290,1 | 8  | 36,26  | F (8, 56) = 47,97 | P<0,0001 |
| Treatment        | 27,73 | 1  | 27,73  | F (1, 7) = 17,32  | P=0,0042 |
| Subject          | 11,21 | 7  | 1,601  | F (7, 56) = 2,118 | P=0,0564 |
| Residual         | 42,33 | 56 | 0,7559 |                   |          |

Difference between column means  
 Mean of WT Control Carr      6,232  
 Mean of WT iSec1 Carr      5,055  
 Difference between means      1,178  
 SE of difference      0,2829  
 95% CI of difference      0,5085 to 1,847

Data summary  
 Number of columns (Treatment)      2  
 Number of rows (Time)      9  
 Number of subjects (Subject)      9  
 Number of missing values      0

Compare each cell mean with the other cell mean in that row

Number of families      1  
 Number of comparisons per family      9  
 Alpha      0,05

| Sidak's multiple comparisons test | Predicted (LS) mean diff, | 95,00% CI of diff, | Significant? | Summary | Adjusted P Value |
|-----------------------------------|---------------------------|--------------------|--------------|---------|------------------|
| WT Control Carr - WT iSec1 Carr   |                           |                    |              |         |                  |
| 0                                 | -0,6398                   | -2,411 to 1,131    | No           | ns      | 0,9621           |
| 1                                 | -0,9823                   | -2,753 to 0,7886   | No           | ns      | 0,6744           |
| 2                                 | -0,1956                   | -1,966 to 1,575    | No           | ns      | >0,9999          |
| 3                                 | 0,6186                    | -1,152 to 2,389    | No           | ns      | 0,9693           |
| 4                                 | 3,345                     | 1,574 to 5,115     | Yes          | ****    | <0,0001          |
| 5                                 | 2,431                     | 0,6605 to 4,202    | Yes          | **      | 0,0019           |
| 6                                 | 2,647                     | 0,8763 to 4,418    | Yes          | ***     | 0,0006           |
| 8                                 | 1,399                     | -0,3720 to 3,170   | No           | ns      | 0,2195           |
| 10                                | 1,975                     | 0,2043 to 3,746    | Yes          | *       | 0,0196           |

| Test details                    | Predicted (LS) mean 1 | Predicted (LS) mean 2 | Predicted (LS) mean diff, | SE of diff, | N1 | N2 | t      | DF |
|---------------------------------|-----------------------|-----------------------|---------------------------|-------------|----|----|--------|----|
| WT Control Carr - WT iSec1 Carr |                       |                       |                           |             |    |    |        |    |
| 0                               | 8,111                 | 8,751                 | -0,6398                   | 0,6184      | 4  | 5  | 1,035  | 63 |
| 1                               | 2,047                 | 3,029                 | -0,9823                   | 0,6184      | 4  | 5  | 1,588  | 63 |
| 2                               | 3,057                 | 3,253                 | -0,1956                   | 0,6184      | 4  | 5  | 0,3163 | 63 |
| 3                               | 3,961                 | 3,343                 | 0,6186                    | 0,6184      | 4  | 5  | 1      | 63 |
| 4                               | 7,705                 | 4,36                  | 3,345                     | 0,6184      | 4  | 5  | 5,409  | 63 |
| 5                               | 7,999                 | 5,567                 | 2,431                     | 0,6184      | 4  | 5  | 3,932  | 63 |
| 6                               | 8,067                 | 5,42                  | 2,647                     | 0,6184      | 4  | 5  | 4,28   | 63 |
| 8                               | 7,275                 | 5,876                 | 1,399                     | 0,6184      | 4  | 5  | 2,262  | 63 |
| 10                              | 7,87                  | 5,895                 | 1,975                     | 0,6184      | 4  | 5  | 3,194  | 63 |

Sup. Fig12G

Two-way RM ANOVA      Matching: Stacked  
 Assume sphericity?      Yes  
 Alpha      0,05

| Source of Variation | % of total variation | P value | P value summary | Significant? |
|---------------------|----------------------|---------|-----------------|--------------|
| Time x Treatment    | 11,78                | <0,0001 | ****            | Yes          |
| Time                | 47,34                | <0,0001 | ****            | Yes          |
| Treatment           | 31,65                | 0,0002  | ***             | Yes          |
| Subject             | 1,61                 | 0,3056  | ns              | No           |

| ANOVA table      | SS    | DF | MS     | F (DFn, DFd)      | P value  |
|------------------|-------|----|--------|-------------------|----------|
| Time x Treatment | 38,74 | 8  | 4,843  | F (8, 40) = 5,703 | P<0,0001 |
| Time             | 155,6 | 8  | 19,45  | F (8, 40) = 22,91 | P<0,0001 |
| Treatment        | 104,1 | 1  | 104,1  | F (1, 5) = 98,27  | P=0,0002 |
| Subject          | 5,295 | 5  | 1,059  | F (5, 40) = 1,247 | P=0,3056 |
| Residual         | 33,97 | 40 | 0,8491 |                   |          |

Difference between column means  
 Mean of CD200ko Control Carr      6,501  
 Mean of CD200ko iSec1 Carr      3,904  
 Difference between means      2,597  
 SE of difference      0,262  
 95% CI of difference      1,924 to 3,271

Data summary  
 Number of columns (Treatment)      2  
 Number of rows (Time)      9  
 Number of subjects (Subject)      7  
 Number of missing values      0

Compare each cell mean with the other cell mean in that row

Number of families      1  
 Number of comparisons per family      9  
 Alpha      0,05

| Sidak's multiple comparisons test         | Predicted (LS) mean diff, | 95,00% CI of diff, | Significant? | Summary | Adjusted P Value |
|-------------------------------------------|---------------------------|--------------------|--------------|---------|------------------|
| CD200ko Control Carr - CD200ko iSec1 Carr |                           |                    |              |         |                  |
| 0                                         | 1,331                     | -0,7413 to 3,403   | No           | ns      | 0,4727           |
| 1                                         | 0,1415                    | -1,931 to 2,214    | No           | ns      | >0,9999          |
| 2                                         | 0,2354                    | -1,837 to 2,308    | No           | ns      | >0,9999          |
| 3                                         | 2,134                     | 0,06207 to 4,206   | Yes          | *       | 0,0397           |
| 4                                         | 3,553                     | 1,481 to 5,625     | Yes          | ****    | <0,0001          |
| 5                                         | 4,445                     | 2,373 to 6,517     | Yes          | ****    | <0,0001          |
| 6                                         | 3,509                     | 1,437 to 5,581     | Yes          | ***     | 0,0001           |
| 8                                         | 3,943                     | 1,871 to 6,015     | Yes          | ****    | <0,0001          |
| 10                                        | 4,082                     | 2,010 to 6,154     | Yes          | ****    | <0,0001          |

| Test details                              | Predicted (LS) mean 1 | Predicted (LS) mean 2 | Predicted (LS) mean diff, | SE of diff, | N1 | N2 | t      | DF |
|-------------------------------------------|-----------------------|-----------------------|---------------------------|-------------|----|----|--------|----|
| CD200ko Control Carr - CD200ko iSec1 Carr |                       |                       |                           |             |    |    |        |    |
| 0                                         | 8,576                 | 7,245                 | 1,331                     | 0,7134      | 3  | 4  | 1,865  | 45 |
| 1                                         | 2,366                 | 2,225                 | 0,1415                    | 0,7134      | 3  | 4  | 0,1984 | 45 |
| 2                                         | 3,447                 | 3,211                 | 0,2354                    | 0,7134      | 3  | 4  | 0,33   | 45 |
| 3                                         | 5,172                 | 3,038                 | 2,134                     | 0,7134      | 3  | 4  | 2,992  | 45 |
| 4                                         | 7,514                 | 3,961                 | 3,553                     | 0,7134      | 3  | 4  | 4,981  | 45 |
| 5                                         | 8,29                  | 3,845                 | 4,445                     | 0,7134      | 3  | 4  | 6,231  | 45 |
| 6                                         | 7,478                 | 3,969                 | 3,509                     | 0,7134      | 3  | 4  | 4,918  | 45 |
| 8                                         | 8,03                  | 4,087                 | 3,943                     | 0,7134      | 3  | 4  | 5,527  | 45 |
| 10                                        | 7,64                  | 3,558                 | 4,082                     | 0,7134      | 3  | 4  | 5,722  | 45 |

Sup. Fig12H

Table Analyzed iSec1\_Mutant\_Facs

|                                    |                      |         |                 |                   |          |
|------------------------------------|----------------------|---------|-----------------|-------------------|----------|
| Two-way ANOVA                      | Ordinary             |         |                 |                   |          |
| Alpha                              | 0,05                 |         |                 |                   |          |
| Source of Variation                | % of total variation | P value | P value summary | Significant?      |          |
| Interaction                        | 38,61                | <0,0001 | ****            | Yes               |          |
| Row Factor                         | 38,61                | <0,0001 | ****            | Yes               |          |
| Column Factor                      | 17,65                | 0,0022  | **              | Yes               |          |
| ANOVA table                        | SS (Type III)        | DF      | MS              | F (DFn, DFd)      | P value  |
| Interaction                        | 0,2487               | 1       | 0,2487          | F (1, 14) = 30,57 | P<0,0001 |
| Row Factor                         | 0,2487               | 1       | 0,2487          | F (1, 14) = 30,57 | P<0,0001 |
| Column Factor                      | 0,1137               | 1       | 0,1137          | F (1, 14) = 13,97 | P=0,0022 |
| Residual                           | 0,1139               | 14      | 0,008135        |                   |          |
| Difference between column means    |                      |         |                 |                   |          |
| Predicted (LS) mean of ASO MM      | 1                    |         |                 |                   |          |
| Predicted (LS) mean of ASO iSec1   | 0,8314               |         |                 |                   |          |
| Difference between predicted means | 0,1686               |         |                 |                   |          |
| SE of difference                   | 0,0451               |         |                 |                   |          |
| 95% CI of difference               | 0,07185 to 0,2653    |         |                 |                   |          |
| Difference between row means       |                      |         |                 |                   |          |
| Predicted (LS) mean of WT          | 0,791                |         |                 |                   |          |
| Predicted (LS) mean of Mutant      | 1,04                 |         |                 |                   |          |
| Difference between predicted means | -0,2494              |         |                 |                   |          |
| SE of difference                   | 0,0451               |         |                 |                   |          |
| 95% CI of difference               | -0,3461 to -0,1526   |         |                 |                   |          |
| Interaction CI                     |                      |         |                 |                   |          |
| Mean diff, A1 - B1                 | 0,4179               |         |                 |                   |          |
| Mean diff, A2 - B2                 | -0,08078             |         |                 |                   |          |
| (A1 - B1) - (A2 - B2)              | 0,4987               |         |                 |                   |          |
| 95% CI of difference               | 0,3053 to 0,6921     |         |                 |                   |          |
| (B1 - A1) - (B2 - A2)              | -0,4987              |         |                 |                   |          |
| 95% CI of difference               | -0,6921 to -0,3053   |         |                 |                   |          |
| Data summary                       |                      |         |                 |                   |          |
| Number of columns (Column Factor)  | 2                    |         |                 |                   |          |
| Number of rows (Row Factor)        | 2                    |         |                 |                   |          |
| Number of values                   | 18                   |         |                 |                   |          |

Compare each cell mean with the other cell mean in that row

|                                  |      |
|----------------------------------|------|
| Number of families               | 1    |
| Number of comparisons per family | 2    |
| Alpha                            | 0,05 |

| Sidak's multiple comparisons test | Predicted (LS) mean di | 95,00% CI of diff, | Significant? | Summary | Adjusted P Value |
|-----------------------------------|------------------------|--------------------|--------------|---------|------------------|
| ASO MM - ASO iSec1                |                        |                    |              |         |                  |
| WT                                | 0,4179                 | 0,2336 to 0,6022   | Yes          | ***     | 0,0001           |
| Mutant                            | -0,08078               | -0,2111 to 0,04956 | No           | ns      | 0,2658           |

| Test details       | Predicted (LS) mean 1 | Predicted (LS) mean 2 | Predicted (LS) mean di | SE of diff, | N1 | N2 | t     | DF |
|--------------------|-----------------------|-----------------------|------------------------|-------------|----|----|-------|----|
| ASO MM - ASO iSec1 |                       |                       |                        |             |    |    |       |    |
| WT                 | 1                     | 0,5821                | 0,4179                 | 0,07364     | 3  | 3  | 5,675 | 14 |
| Mutant             | 1                     | 1,081                 | -0,08078               | 0,05207     | 6  | 6  | 1,551 | 14 |

Sup. Fig121

Two-way RM ANOVA      Matching: Stacked  
 Assume sphericity?      Yes  
 Alpha      0,05

| Source of Variation | % of total variation | P value | P value summary | Significant? |
|---------------------|----------------------|---------|-----------------|--------------|
| Time x Treatment    | 17,48                | <0,0001 | ****            | Yes          |
| Time                | 60,92                | <0,0001 | ****            | Yes          |
| Treatment           | 6,469                | 0,0162  | *               | Yes          |
| Subject             | 3,539                | 0,0385  | *               | Yes          |

| ANOVA table      | SS    | DF | MS    | F (DFn, DFd)      | P value  |
|------------------|-------|----|-------|-------------------|----------|
| Time x Treatment | 78,85 | 8  | 9,856 | F (8, 48) = 9,047 | P<0,0001 |
| Time             | 274,8 | 8  | 34,35 | F (8, 48) = 31,53 | P<0,0001 |
| Treatment        | 29,19 | 1  | 29,19 | F (1, 6) = 10,97  | P=0,0162 |
| Subject          | 15,97 | 6  | 2,661 | F (6, 48) = 2,442 | P=0,0385 |
| Residual         | 52,29 | 48 | 1,089 |                   |          |

| Difference between column means |                   |
|---------------------------------|-------------------|
| Mean of CD200ko-iSecsi (EV)     | 5,289             |
| Mean of CD200ko-iSecsi (iSec)   | 6,562             |
| Difference between means        | -1,273            |
| SE of difference                | 0,3845            |
| 95% CI of difference            | -2,214 to -0,3325 |

Data summary  
 Number of columns (Treatment)      2  
 Number of rows (Time)      9  
 Number of subjects (Subject)      8  
 Number of missing values      0

Compare each cell mean with the other cell mean in that row

Number of families      1  
 Number of comparisons per family      9  
 Alpha      0,05

| Sidak's multiple comparisons test           | Mean Diff, | 95,00% CI of diff, | Significant? | Summary | Adjusted P Value |
|---------------------------------------------|------------|--------------------|--------------|---------|------------------|
| CD200ko-iSecsi (EV) - CD200ko-iSecsi (iSec) |            |                    |              |         |                  |
| -4                                          | 0,01438    | -2,276 to 2,304    | No           | ns      | >0,9999          |
| -3                                          | 0,4726     | -1,817 to 2,763    | No           | ns      | 0,9993           |
| -1                                          | 0,7609     | -1,529 to 3,051    | No           | ns      | 0,9771           |
| 1                                           | -0,1248    | -2,415 to 2,165    | No           | ns      | >0,9999          |
| 2                                           | -0,01208   | -2,302 to 2,278    | No           | ns      | >0,9999          |
| 3                                           | -0,405     | -2,695 to 1,885    | No           | ns      | 0,9998           |
| 4                                           | -3,219     | -5,509 to -0,9289  | Yes          | **      | 0,0015           |
| 5                                           | -5,624     | -7,914 to -3,334   | Yes          | ****    | <0,0001          |
| 6                                           | -3,323     | -5,613 to -1,033   | Yes          | ***     | 0,001            |

| Test details                                | Mean 1 | Mean 2 | Mean Diff, | SE of diff, | N1 | N2 | t       | DF |
|---------------------------------------------|--------|--------|------------|-------------|----|----|---------|----|
| CD200ko-iSecsi (EV) - CD200ko-iSecsi (iSec) |        |        |            |             |    |    |         |    |
| -4                                          | 8,965  | 8,95   | 0,01438    | 0,795       | 4  | 4  | 0,01808 | 54 |
| -3                                          | 7,877  | 7,405  | 0,4726     | 0,795       | 4  | 4  | 0,5945  | 54 |
| -1                                          | 8,275  | 7,514  | 0,7609     | 0,795       | 4  | 4  | 0,9571  | 54 |
| 1                                           | 2,415  | 2,539  | -0,1248    | 0,795       | 4  | 4  | 0,157   | 54 |
| 2                                           | 3,612  | 3,624  | -0,01208   | 0,795       | 4  | 4  | 0,0152  | 54 |
| 3                                           | 4,665  | 5,07   | -0,405     | 0,795       | 4  | 4  | 0,5094  | 54 |
| 4                                           | 4,297  | 7,516  | -3,219     | 0,795       | 4  | 4  | 4,049   | 54 |
| 5                                           | 3,184  | 8,809  | -5,624     | 0,795       | 4  | 4  | 7,075   | 54 |
| 6                                           | 4,31   | 7,632  | -3,323     | 0,795       | 4  | 4  | 4,18    | 54 |
